# Supplementary material for: Genomics in Bacterial Taxonomy: Impact on the Genus Pseudomonas
Source: Genes (Basel). 2020 Jan 29;11(2):139. doi: 10.3390/genes11020139 (PMC7074058; doi:10.3390/genes11020139)
Supplement: Supplementary file 1 [file genes-11-00139-s001.zip]

Archive with 5 entries (5 files):
- FigureSupplementaryS1_S4.pdf
- TableS1 Numeros de Acceso v5MG_DEF.xlsx
- TableS2_16S rDNA 140120_MG.xlsx
- TableS3_4Concagenes 140120_MG.xlsx
- TableS4_ComparisonConca4HesseParks_VS2MG.xlsx
