# Supplementary material for: Genomics in Bacterial Taxonomy: Impact on the Genus Pseudomonas
Source: Genes (Basel). 2020 Jan 29;11(2):139. doi: 10.3390/genes11020139 (PMC7074058; doi:10.3390/genes11020139)
Supplement: Supplementary file 1 [file genes-11-00139-s001.zip › TableS1 Numeros de Acceso v5MG_DEF.xlsx]

## Sheet: Hoja1
TABLE S1. Species type strains analyzed in this study. Individual genes or genome accession numbers are also indicated.
Species	Type strain	16S rDNA	gyrB gene	rpoD gene	rpoB gene	Genome
Pseudomonas abietaniphila	ATCC 700689	AJ011504.1	FN554166.1	FN554447.1	AJ717416.1	FNCO00000000.1
Pseudomonas abyssi	MT5	NTMR00000000.1	NTMR00000000.1	NTMR00000000.1	NTMR00000000.1	NTMR00000000.1
Pseudomonas aeruginosa	ATCC 10145	HE978271.1	AB039386.1	AB039607.1	AJ717442.1	CP012001.1
Pseudomonas aestus	CMAA1215	KX347965	AVOY00000000.1	AVOY00000000.1	-	AVOY00000000.1
Pseudomonas aestusnigri	GXO14	HG004394.1	HG004396.1	FN994281.2	NBYK00000000.1	NBYK00000000.1
Pseudomonas agarici	ATCC 25941	Z76652.1	AB039457.1	AB039563.1	AJ717477.1	FOAR00000000.1
Pseudomonas alcaligenes	ATCC 14909	D84006.1	AB039388.1	AB039606.1	AJ279966.1	BATI00000000.1
Pseudomonas alcaliphila	LMG 23134	AB030583.1	FN554167.1	FN554448.1	AJ717463.1	FNAE00000000.1
Pseudomonas alkylphenolica	JCM 16553	CP009048.1	HE577792.1	HE577794.1	HE577798.1	CP009048.1
Pseudomonas amygdali	LMG 13184	Z76654.1	AB039462.1	AB039509.1	AJ717462.1/FN554726.1	JYHB00000000.1
Pseudomonas anguilliseptica	LMG 21629	X99540.1	FN554168.1	FN554449.1	AJ717417.1	FNSC00000000.1
Pseudomonas antarctica	LMG 22709	AJ537601.1	FN554169.1	FN554450.1	FN554727.1	LT629704.1
Pseudomonas argentinensis	LMG 22563	AY691188.2	FN554170.1	FN554451.1	FN554728.1	FORC00000000.1
Pseudomonas arsenicoxydans	CECT 7543	FN645213.1	FN645139.1	FN645160/HE800488.1	HE800503.1	LT629705.1
Pseudomonas asiatica	RYU5	MH517510.1	LC435051.1	LC435053.1	LC435052.1	SAMD00127555-00127557
Pseudomonas asplenii	LMG 2137	AB021397.1	AB039455.1	AB039593.1	AJ717432.1	LT629777.1
Pseudomonas asturiensis	LMG 26898	FRDA00000000.1	FRDA00000000.1	FRDA00000000.1	FRDA00000000.1	FRDA00000000.1
Pseudomonas asuensis	DSM 17866	AJ871471.1	-	-	-	-
Pseudomonas avellanae	CIP 105176	U49384.1	FN554173.1	FN554454.1	AJ717469.1	AKBS00000000.1
Pseudomonas aylmerense	S1E40	MAUE00000000.1	MAUE00000000.1	MAUE00000000.1	MAUE00000000.1	MAUE00000000.1
Pseudomonas azotifigens	DSM 17556	AB189452.1	FN554174.1	AUDU00000000.1	FN554729.1	AUDU00000000.1
Pseudomonas azotoformans	LMG 21611	D84009.1	AB039411.1	AB039547.1	AJ717458.1	LT629702.1
Pseudomonas baetica	CECT 7720	FM201274.3	FN201278/HE800470.1	FN678357.1	HE800504.1	PHHE00000000.1
Pseudomonas balearica	DSM 6083	U26418.1	AB039394.1	AB039605.1	AJ717480.1	CP007511.1
Pseudomonas batumici	UCM_B-321	JXDG00000000.1	JXDG00000000.1	JXDG00000000.1	JXDG00000000.1	JXDG00000000.1
Pseudomonas bauzanensis	DSM 22558	GQ161991.1	HE800471.1	HE800489.1	HE800505.1	PFOGN00000000.1
Pseudomonas benzenivorans	DSM 8628	FM208263.1	HE800472.1	HE800490.1	HE800506.1	FNCT00000000.1
Pseudomonas bohemica	IA19	MG190030.1	NKHL00000000.1	NKHL00000000.1	NKHL00000000.1	NKHL00000000.1
Pseudomonas borbori	LMG 23199	AM114527.1	FN554175.1	FN554456.1	FN554730.1	FOWX00000000.1
Pseudomonas brassicacearum
Pseudomonas brassicacearum subsp. brassicacearum	DSM 13227	AF100321.1	AM084675.1	AM084334.1	AJ717436.1	LT629713.1
Pseudomonas brenneri	DSM 15294	AF268968.1	FN554176.1	FN554457.1	AJ717482.1	LT629800
Pseudomonas caeni	CECT 7778	EU620679.2	HE800473.1	HE800491.1	HE800507.1	ATXQ00000000.1
Pseudomonas canadensis	2-92	AYTD00000000.1	AYTD00000000.1	AYTD00000000.1	AYTD00000000.1	AYTD00000000.1
Pseudomonas cannabina	LMG 5096	AJ492827	FN554177.1	FN554458.1	AJ717453.1	LJPX00000000.1
Pseudomonas caricapapayae	LMG 2152	D84010	AB039454.1	AB039507.1	AJ717437.1	LJPW00000000.1
Pseudomonas caspiana	FBF102	HG805773.1	HG805671.1	HG805592.1	LOHF00000000.1	LOHF00000000.1
Pseudomonas cedrina
Pseudomonas cedrina subsp. cedrina	CFML 96-198;DSM 17516	AF064461.1	FN554178.1	FN554459.1	AJ717424.1	LT629753.1
Pseudomonas cedrina subsp. fulgida	DSM 14938;LMG21467	AJ492830.1	KP260626.1	HE586449.1	KX186859.1	-
Pseudomonas cerasi	LMG 28609	LN713316	LT222319.1	LT222319.1	LN713308.1	LT222319.1
Pseudomonas chengduensis	DSM 26382	EU307111	JX042516.1	JX042517.1	FMZQ00000000.1	FMZQ00000000.1
Pseudomonas chloritidismutans	AW-1	AY017341.1	AJ880092.2	DAJ880091.1	AOFQ00000000.1	AOFQ00000000.1
Pseudomonas chlororaphis
Pseudomonas chlororaphis subsp. aurantiaca	NCIB 10068	DQ682655.1	FN554171.1	FN554452.1	AJ717421.1	LT629747.1
Pseudomonas chlororaphis subsp. aureofaciens	DSM 6698	AY509898.1	FN554172.1	FN554453.1	AJ717426.1	LT629738.1
Pseudomonas chlororaphis subsp. chlororaphis	DSM 50083	Z76673.1	D86019.1	AB039549.1	AJ717478.1	LT852426.1
Pseudomonas chlororaphis subsp. piscium	DSM 21509	LT629761.1	LT629761.1	LT629761.1	LT629761.1	LT629761.1
Pseudomonas cichorii	ATCC 10857	Z76658.1	AB039434.1	AB039526.1	AJ717418.1	FNIK00000000.1
Pseudomonas citronellolis	LMG 18378	Z76659.1	AB039452.1	AB039604.1	AJ717460.1	FOLS00000000.1
Pseudomonas coleopterorum	CECT 8695	KM888184.1	KM888185.1	KM888187.1	KM888186.1	FNTZ00000000.1
Pseudomonas composti	C2	FN429930.1	HE800474.1	FR716577.1	HE800508.1	FOWP00000000.1
Pseudomonas congelans	LMG 21466	AJ492828	FN554179.1	FN554460.1	FN554731.1	FNJH00000000.1
Pseudomonas coronafaciens	LMG 5060	MF662828.1	JSED00000000.1	JSED00000000.1	JSED00000000.1	JSED00000000.1
Pseudomonas corrugata	ATCC 29736	D84012.1	AB039460.1	AB039566.1	AJ717487.1	LIGR00000000.1
Pseudomonas costantinii	LMG 22119	AF374472.1	FN554180.1	FN554461.1	FN554732.1	MDDR00000000.1
Pseudomonas cremoricolorata	DSM 17059	AB060137.1	FN554181.1	FN554462.1	AUEA00000000.1	AUEA00000000.1
Pseudomonas cuatrocienegasensis	CIP 109853	EU791281.1	FOFP00000000.1	FOFP00000000.1	FOFP00000000.1	FOFP00000000.1
Pseudomonas deceptionensis	CECT 7677	GU936597.1	HE800476.1	GU936596.1	HE800510.1	JYKX00000000.1
Pseudomonas delhiensis	RLD-1	DQ339153.1	HE800477.1	HE800493.1	HE800511.1	FNEC00000000.1
Pseudomonas donghuensis	HYS	AJJP00000000.1	AJJP00000000.1	AJJP00000000.1	AJJP00000000.1	AJJP00000000.1
Pseudomonas duriflava	KCTC 22129	EU046271.1	HE800478.1	HE800494.1	HE800512.1	VLKY00000000.1
Pseudomonas endophytica	BSTT44;CECT 8691T	LN624760.1	LN624765.1	LN624763.1	LLWH00000000.1	LLWH00000000.1
Pseudomonas entomophila	L48T	AY907566.1	CT573326.1	CT573326.1	CT573326.1	CT573326.1
Pseudomonas extremaustralis	DSM 17835	AJ583501.3	HE800479.1	JN814374.1/HE800495.1	JN814371.1	LT629689.1
Pseudomonas extremorientalis	LMG 19695	AF405328.1	FN554182.1	FN554464.1	FN554733.1	MDGK00000000.1
Pseudomonas ficuserectae	CCUG 32779	AB021378.1	AB039418.1	AB039501.1	AJ717457.1	LJQJ00000000.1
Pseudomonas flavescens	LMG 18387	U01916.1	FN554183.1	FN554465.1	AJ717468.1	FNDG00000000.1
Pseudomonas flexibilis	ATCC 29606	JRUD00000000.1	JRUD00000000.1	JRUD00000000.1	JRUD00000000.1	JRUD00000000.1
Pseudomonas floridensis	GEV388	MUIO00000000.1	MUIO00000000.1	MUIO00000000.1	MUIO00000000.1	MUIO00000000.1
Pseudomonas fluorescens	ATCC 13525	D84013.1	D86016.1	AB039545.1	AJ717451.1	LHVP00000000.1
Pseudomonas fluvialis	ASS-1	KU248754.1	NMQV00000000.1	NMQV00000000.1	NMQV00000000.1	NMQV00000000.1
Pseudomonas formosensis	JCM 18415	JF432053.1	FOYD00000000.1	FOYD00000000.1	FOYD00000000.1	FOYD00000000.1
Pseudomonas fragi	CECT 446	AF094733.1	FN554184.1	FN554466.1	AJ717444.1	LT629783.1
Pseudomonas frederiksbergensis	LMG 19851	AF094733.1	AM084676.1	AM084335.2	AJ717465.1	FNTF00000000.1
Pseudomonas fulva	ATCC 31418	AB060136.1	AB039395.1	AB039586.1	AJ717419.1	BBIQ00000000.1
Pseudomonas furukawaii	KF707	AB109887.1	AP014862.1	AP014862.1.1	AP014862.1	AP014862.1
Pseudomonas fuscovaginae	LMG 2158	FJ483519.1	FN554185.1	FN554467.1	AJ717433.1	LT629972.1
Pseudomonas gallaeciencis	V113	FN995250.2	LN876645.1	FN994225.2	LMAZ00000000.1	LMAZ00000000.1
Pseudomonas gessardii	LMG 21604	AF074384.1	FN554186.1	FN554468.1	AJ717438.1	FNKR00000000.1
Pseudomonas glareae	KMM 9500	LC011944.1	-	-	-	-
Pseudomonas graminis	LMG 21661	Y11150.1	FN554187.1	FN554469.1	AJ717429.1	FOHW00000000.1
Pseudomonas granadensis	DSM 28040	HG764746.1	HG764749.1	HG764748.1	HG764747.1	LT629778.1
Pseudomonas gregormendelii	LMG 28632	KP123631.1	-	KP123633.1	-	-
Pseudomonas grimontii	ATCC BAA-140	AF268029.1	FN554188.1	FN554470.1	AJ717439.1	FNKM00000000.1
Pseudomonas guangdongensis	CCTCC 2012022	JX274436.1	LT629780.1	LT629780.1	LT629780.1	LT629780.1
Pseudomonas guariconensis	LMG 27394	HF674459.1	HF674462/LN851841.1	HF674460.1/LN851842.1	HF674461.1/LN851843.1	FMYX00000000.1
Pseudomonas guguanensis	JCM 18416	JQ864237.1	JQ864238.1	FNJJ00000000.1	FNJJ00000000.1	FNJJ00000000.1
Pseudomonas guineae	M8	AM491810.1	FN554189.1	FN554471.1	FN554734.1	FOQL00000000.1
Pseudomonas helleri	DSM 29165	JYLD00000000.1	JYLD00000000.1	JYLD00000000.1	JYLD00000000.1	JYLD00000000.1
Pseudomonas helmanticensis	CECT 8548	HG940537.1	SOCQ00000000.1	HG940517.1	HG940518.1	Gp0112928
Pseudomonas humi	CCA1	BDGS00000000.1	BDGS00000000.1	BDGS00000000.1	BDGS00000000.1	BDGS00000000.1
Pseudomonas hunanensis	NCCB 100446	J545210.1	JX545211.1/KP151497.1	KP151501.1	PISL00000000.1	PISL00000000.1
Pseudomonas hussainii	JCM 19513	KF582606.1	FOAS00000000.1	FOAS00000000.1	FOAS00000000.1	FOAS00000000.1
Pseudomonas indica	LMG 23066	AF302795.1	FN554190.1	FN554472.1	AJ717481.1	FNFD00000000.1
Pseudomonas indoloxydans	JCM 14246	DQ916277.2	AB548144.1	AB548146/HE800496.1	AB548148.1	QASO00000000.1
Pseudomonas japonica	JCM 21532	AB126621.2	GQ996725.1	HE577795.1	HE577800.1	BBI00000000.1
Pseudomonas jessenii	ATCC 700870	AF068259.1	FN554191.1	FN554473.1	AJ717447.1	FNTC00000000.1
Pseudomonas jinjuensis	LMG 21316	AF468448.1	FN554192.1	FN554474.1	FN554735.1	FNIJ00000000.1
Pseudomonas kairouanesis	KC12	LR031357.1	LR130162.1	LR130152.1	QUZU00000000.1	QUZU00000000.1
Pseudomonas kilonensis	DSM 13647	AJ292426.1	AM084677.2	AM084336.1	AJ717472.1	LHVH00000000.1
Pseudomonas knackmussii	LMG 23759	AF039489.1	FN554193.1	FN554475.1	FN554736.1	NZ_HG322950.1
Pseudomonas koreensis	LMG 21318	AF468452.1	FN554194.1	FN554476.1	FN554737.1	LT629687.1
Pseudomonas kribbensis	DSM 100278	KT321658.1	KT183428.1	CP029608.1	KT183429.1	CP029608.1
Pseudomonas kunmingensis	DSM 25974	JQ246444.1	FORS00000000.1	FORS00000000.1	FORS00000000.1	FORS00000000.1
Pseudomonas kuykendallii	NRRL B-59562	JF749828.1	FNNU00000000.1	FNNU00000000.1	FNNU00000000.1	FNNU00000000.1
Pseudomonas lactis	DSM 29167	JYLO00000000.1	JYLO00000000.1	JYLO00000000.1	JYLO00000000.1	JYLO00000000.1
Pseudomonas laurylsulfatiphila	AP3_16	NIRS00000000.1	NIRS00000000.1	NIRS00000000.1	NIRS00000000.1	NIRS00000000.1
Psudomonas laurentiana	GSL-010	KY471137.1	-	-	-	-
Pseudomonas laurylsulfatovorans	AP3_22	MUJK00000000.1	MUJK00000000.1	MUJK00000000.1	MUJK00000000.1	MUJK00000000.1
Pseudomonas libanensis	CIP 105460	AF057645.1	FN554195.1	FN554477.1	AJ717454.1	LT629699.1
Pseudomonas lini	CFBP 5737	AY035996.2	FN554196.1	FN554478.1	AJ717466.1	LT629746.1
Pseudomonas linyingensis	LMG 25967	HM246142.1	FNZE00000000.1	FNZE00000000.1	FNZE00000000.1	FNZE00000000.1
Pseudomonas litoralis	2SM5	FN908483.1	FN908486.1	FN908485.1	FN908484.1	LT629748.1
Pseudomonas lundensis	ATCC 49968	AB021395.1	FN554197.1	FN554479.1	AJ717428.1	JYKY00000000.1
Pseudomonas lurida	P 513/18	AJ581999.1	HE800480.1	HE800497.1	HE800513.1	PDJB00000000.1
Pseudomonas lutea	LMG 21974	AY364537.1	FN554198.1	FN554480.1	FN554738.1	JRMB00000000.1
Pseudomonas luteola	LMG 7041	D84002.1	FN554199.1	FN554481.1	AJ717452.1	FOEV00000000.1
Pseudomonas mandelii	LMG 21607	AF058286.1	FN554200.1	FN554482.1	AJ717435.1	LT629796.1
Pseudomonas mangrovi	TC-11	MH137036.1	QASN00000000.1	QASN00000000.1	QASN00000000.1	QASN00000000.1
Pseudomonas marginalis	ATCC 10844	Z76663.1	AB039448.1	AB039575.1	AJ717425.1	FNSU00000000.1
Pseudomonas marincola	JCM 14761	AB301071.1	FN554201.1	FN554483.1	FN554739.1	FPBC00000000.1
Pseudomonas massiliensis	CB1	CCYK00000000.1	CCYK00000000.1	CCYK00000000.1	CCYK00000000.1	CCYK00000000.1
Pseudomonas matsuisoli	CCMHH0089	KJ720680.1	KM249139.1	MK191849.1	KM249140.1	-
Pseudomonas mediterranea	CFBP 5447	AF386080.1	AM084678.2	AM084337.1	AJ717449.1	LT629790.1
Pseudomonas meliae	CCUG 51503	AB021382.1	FN554202.1	FN554484.1		JYHE00000000.1
Pseudomonas mendocina	ATCC 25411	D84016.1	AJ633103.1	AJ633567.1	AJ279967.1	BBQC00000000.1
Pseudomonas meridiana	CIP 108465	AJ537602 .1	FN554203.1	FN554485.1	FN554740.1	-
Pseudomonas migulae	CCUG 43165	AF074383.1	FN554204.1	FN554486.1	AJ717446.1	FNTY00000000.1
Pseudomonas mohnii	CCUG 53115	AM293567.1	AM293561.1	FN554487.1	FN554741.1	FNRV00000000.1
Pseudomonas monteilii	ATCC 700476	AF064458.1	FN554205.1	FN554488.1	AJ717455.1	JHYV00000000.1
Pseudomonas moorei	CCUG 53114	AM293566.1	AM293560.1	FN554489.1	FN554742.1	FNKJ00000000.1
Pseudomonas moraviensis	DSM 16007	AY970952.1	FN554206.1	FN554490.1	FN554743.1	LT629788.1
Pseudomonas mosselii	ATCC BAA-99	AF072688.2	FN554207.1	FN554491.1	FN554744.1	JHYW00000000.1
Pseudomonas mucidolens	LMG 2223	D84017.1	AB039409.1	AB039546.1	AJ717427.1	LT629802.1
Pseudomonas multiresinivorans	ATCC 700690	X96787.1	-	-	-	-
Pseudomonas nabeulensis	E10B	LR130177.1	LR130168.1	LR130158.1	QUZT00000000.1	QUZT00000000.1
Pseudomonas nitritireducens	LMG 25966	HM246143.1	LT601026.1	LT601022.1	-	-
Pseudomonas nitroreducens	ATCC 33634	AM088473.1	FN554208.1	FN554492.1	AJ717448.1	FZOM00000000.1
Pseudomonas oceani	DSM 100277	KT449732.1	KU187947.1	KU187948.1	PPSK00000000.1	PPSK00000000.1
Pseudomonas oleovorans
Pseudomonas oleovorans subsp. lubricantis	RS1	DQ842018.3	EF675630.1	EF667505.1	-	-
Pseudomonas oleovorans subsp. oleovorans	ATCC 8062	D84018.1	AB039396.1	AB039601.1	AJ717461.1	FNZC00000000.1
Pseudomonas orientalis	DSM 17489	AF064457.1	FN554209.1	FN554493.1	AJ717434.1	LT629782.1
Pseudomonas oryzae	KCTC 32247	KF317694.2	LT629751.1	LT629751.1	LT629751.1	LT629751.1
Pseudomonas oryzihabitans	ATCC 43272	AM262973.1	FN554210.1	FN554494.1	HE800519.1	BBIT00000000.1
Pseudomonas otitidis	DSM 17224	AY953147.1	FN554211.1	FN554495.1	FN554745.1	FOJP00000000.1
Pseudomonas pachastrellae	CCUG 46540	AB125366.1	FN554212.1	FN554496.1	FN554746.1	FOUD00000000.1
Pseudomonas palleroniana	LMG 23076	AY091527.1	FN554213.1	FN554497.1	FN554747.1	FNUA00000000.1
Pseudomonas panacis	CIP108524	AY787208.3	FN554214.1	FN554498.1	FN554748.1	FNSP00000000.1
Pseudomonas panipatensis	CCM 7469T	EF424401.1	FN554215.1	FN554499.1	FN554749.1	FNDS00000000.1
Pseudomonas parafulva	DSM 17004	AB060132.1	FN554216.1	FN554500.1	AJ717471.1	AUEB00000000.1
Pseudomonas paralactis	DSM 29164	JYLN00000000.1	JYLN00000000.1	JYLN00000000.1	JYLN00000000.1	JYLN00000000.1
Pseudomonas pelagia	JCM 15562	EU888911.1	FN908496.1	FN908495.1	FN908494.1	AROI00000000.1
Pseudomonas peli	LMG 23201	AM114534.1	FN554217.1	FN554501.1	FN554750.1	FMTL00000000.1
Pseudomonas perfectomarina	ATCC 14405 = CCUG 16156	U65012.1	AGSL00000000.1	AGSL00000000.1	AGSL00000000.1	AGSL00000000.1
Pseudomonas pertucinogena	LMG 1874	AB021380.1	DQ350613.2	FN554502.1	AJ717441.1	Go0013192
Pseudomonas pharmacofabricae	ZYSR67-Z	KX910087.1	PIYS00000000.1	PIYS00000000.1	PIYS00000000.1	PIYS00000000.1
Pseudomonas plecoglossicida	ATCC 700383	AB009457.1	FN554218.1	FN554503.1	AJ717456.1	BBIV00000000.1
Pseudomonas poae	LMG 21465	AJ492829.1	FN554219.1	FN554504.1	FN554751.1	LT629706.1
Pseudomonas pohangensis	DSM 17875	LT629785.1	LT629785.1	LT629785.1	LT629785.1	LT629785.1
Pseudomonas populi	CCTCC AB 2013069	KC609749.2	KJ561381.1	KJ570856.1	-	-
Pseudomonas profundi	M5	VTPZ00000000.1	VTPZ00000000.1	VTPZ00000000.1	VTPZ00000000.1	VTPZ00000000.1
Pseudomonas prosekii	LMG 26867	JN814372.1	JN814373.1	JN814373.1	JN814370.1	LT629762.1
Pseudomonas protegens	DSM 19095	AJ278812.1	DQ458573.1/HE800482.1	X84416.1	DQ458638.1/HE800514.1	CP003190.1
Pseudomonas proteolytica	CIP 108464	AJ537603.1	FN554220.1	FN554505.1	FN554752.1	FNTR00000000.1
Pseudomonas pseudoalcaligenes
Pseudomonas pseudoalcaligenes subsp. pseudoalcaligenes	LMG 1225	Z76666.1	AB039397.1	AB039602.1	AJ717430.1	Gp0023768
Pseudomonas psychrophila	DSM17535	AB041885.1	FN554221.1	FN554506.1	AJ717464.1	LT629795.1
Pseudomonas psychrotolerans	LMG 21977	AJ575816.1	FN554222.1	FN554507.1	FN554753.1	FMWB00000000.1
Pseudomonas punonensis	CECT 8089	JQ344321.1	FRBQ00000000.1	FRBQ00000000.1	JX435104.1	FRBQ00000000.1
Pseudomonas putida	ATCC 12633	D84020.1	AB039451.1	AB039581.1	AJ717474.1	AP013070.1
Pseudomonas pyomelaminifaciens	MR 02	PESJ00000000.1	PESJ00000000.1	PESJ00000000.1	PESJ00000000.1	PESJ00000000.1
Pseudomonas qingdaonensis	JJ3	MG589917.1	PHTD00000000.1	PHTD00000000.1	PHTD00000000.1	PHTD00000000.1
Pseudomonas reidholzensis	CCOS 865	LT009707.2	UNOZ00000000.1	LT009713.1	UNOZ00000000.1	UNOZ00000000.1
Pseudomonas reinekei	CCUG 53116	AM293565.1	AM293559.1	FN554508.1	FN554754.1	MSTQ00000000.1
Pseudomonas resinovorans	LMG 2274	Z76668.1	FN554223.1	FN554509.1	AJ717479.1	AUIE00000000.1
Pseudomonas rhizosphaerae	LMG 21640	AY152673.1	FN554224.1	FN554510.1	FN554755.1	CP009533.1
Pseudomonas rhodesiae	LMG 17764	AF064459.1	FN554225.1	FN554511.1	AJ717431.1	LT629801.1
Pseudomonas sabulinigri	KCTC 22137	EU143352.1	FN908493.1	FN908492.1	FN908491.1	LT629763.1
Pseudomonas sagittaria	JCM 18195	JQ277453.1	FOXM00000000.1	FOXM00000000.1	FOXM00000000.1	FOXM00000000.1
Pseudomonas salegens	CECT 8338	LT629787.1	LT629787.1	LT629787.1	LT629787.1	LT629787.1
Pseudomonas salina	XCD-X85	KC762324.2	VTTI00000000.1	VTTI00000000.1	VTTI00000000.1	VTTI00000000.1
Pseudomonas salomonii	LMG 22120	AY091528.1	FN554226.1	FN554512.1	FN554756.1	MDFI00000000.1
Pseudomonas saponiphila	DSM 9751	FM208264.1	HE800483.1	HE800499.1	HE800515.1	FNTJ00000000.1
Pseudomonas saudimassiliensis	12M76	LK391969.1	LK391969.1	LK391969.1	LK391969.1	LK391969.1
Pseudomonas saudiphocaensis	20 BN	LK021121.2	CCSF00000000.1	CCSF00000000.1	CCSF00000000.1	CCSF00000000.1
Pseudomonas savastanoi	LMG 2209	AB021402.1	AB039469.1	AB039514.1	AJ717422.1	LJRJ00000000.1
Pseudomonas sediminis	PI11	KP319033.1	NIQU00000000.1	NIQU00000000.1	NIQU00000000.1	NIQU01000000.1
Pseudomonas segetis	IMSNU 14101	AY770691.2	HE800484.1	HE800500.1	HE800516.1	FZOG00000001.1
Pseudomonas seleniipraecipitans	LMG 25475	FJ422810.1	HE800485.1	HE800501.1	HE800517.1	FNBM00000000.1
Pseudomonas sesami	SI-P133	NR_149822.1	-	-	KY498640.1	-
Pseudomonas sichuanensis	WCHPs060039;TC-11	MH428810.1	QKVM00000000.1	QKVM00000000.1	QKVM00000000.1	QKVM00000000.1
Pseudomonas sihuiensis	KCTC 32246	LT629797.1	LT629797.1	LT629797.1	LT629797.1	LT629797.1
Pseudomonas silesiensis	A3	CP014870.1	CP014870.1	CP014870.1	CP014870.1	CP014870.1
Pseudomonas simiae	Oli	AJ936933.1	FN554227.1	FN554513.1	FN554757.1	MDFH00000000.1
Pseudomonas soli	LMG 27941	HF930598.1	HF930597.1	HF930597.1	HF930596.1	FOEQ00000000.1
Pseudomonas songnenensis	NEAU-ST5-5	JQ762269.1	KP151494.1	KP151498.1	RFFN00000000.1	RFFN00000000.1.1
Pseudomonas straminea	LMG 21615	D84023.1	AB039410.1	AB039600.1	FN554758.1	FOMO00000000.1
Pseudomonas stutzeri	ATCC 17588	AF094748.1	AJ617557.1	AJ631316.1	AJ279962.1	CP002881.1
Pseudomonas synxantha	ATCC 9890	D84025.1	AB039415.1	AB039550.1	AJ717420.1	LT629786.1
Pseudomonas syringae	NCPPB 281	DQ318866.1	AB039428.1	AB039516.1	FN554759.1	JALK00000000.1
Pseudomonas taeanensis	KCTC 22612	FJ424813.1	HE800486.1	HE800502.1	HE800518.1	AWSQ00000000.1
Pseudomonas taetrolens	LMG 2336	D84027.1	AB039412.1	AB039523.1	AJ717423.1	JYLA00000000.1
Pseudomonas taiwanensis	DSM 21245	EU103629.1	FJ418634/HE800487.1	HE577796.1	HE577797.1	AUEC00000000.1
Pseudomonas tarimensis	MA-69	KC709664.1	KM077173.1	KM095629.1	KJ995816.1	-
Pseudomonas thermotolerans	CIP 107795	AJ311980.1	FN554228.1	FN554514.1	FN554760.1	AQPA00000000.1
Pseudomonas thivervalensis	DSM 13194	AF100323.1	AM084679.1	AM084338.2	AM0844680.1	LHVE00000000.1
Pseudomonas tianjinensis	KCTC 52977	MF083697.1	-	-	-	-
Pseudomonas tolaasii	ATCC 33618	AF255336.1	AB039423.1	AB039561.1	AJ717467.1	PHHD00000000.1
Pseudomonas toyotomiensis	NCIMB 14511	AB453701.1	AB494447.1	AB548145.1	AB548147.1	FOXK00000000.1
Pseudomonas tremae	LMG 22121	AJ492826.1	DQ072692/FN554229.1	DQ072714.1/FN554463.1	FN554761.1	LJRO00000000.1
Pseudomonas trivialis	LMG 21464	AJ492831.1	FN554230.1	FN554515.1	FN554762.1	JYLK00000000.1
Pseudomonas tuomuerensis	CECT 7766	DQ868767.1	AB571150.1/KR706346.1	AB571152.1	AB571151.1	JTAK00000000.1
Pseudomonas turukhanskensis	IB-1.1	KP306892.1	LT219440.1	LT219438.1	LT219439.1	-
Pseudomonas umsongensis	LMG 21317	AF468450.1	FN554231.1	FN554516.1	FN554763.1	LT629767.1
Pseudomonas urumqiensis	T3	MH355542.1	RBZQ00000000.1	RBZQ00000000.1	RBZQ00000000.1	RBZQ00000000.1
Pseudomonas uticensis	UC17F4	KU577462.1	DQ497208.1.1	DQ497211.1	-	-
Pseudomonas vancouverensis	ATCC 700688	AJ011507.1	FN554232.1	FN554517.1	AJ717473.1	LT629803.1
Pseudomonas veronii	LMG 17761	AF064460.1	FN554233.1	FN554518.1	AJ717445.1	JYLL00000000.1
Pseudomonas versuta	L10.10	KC433618.1	KY264775.1	KY264773.1	KY264774.1	CP012676.1
Pseudomonas viridiflava	ATCC 13223	AY180972.1	AB039427.1	AB039520.1	FN554764.1	LJRS00000000.1
Pseudomonas vranovensis	DSM 16006	AY970951.1	HE577791.1	HE577793.1	HE577799.1	AUED00000000.1
Pseudomonas wadenswillerensis	CCOS 864	LT009706.2	UIDD00000000.1	UIDD00000000.1	UIDD00000000.1	UIDD00000000.1
Pseudomonas weihenstephanensis	DSM 29166	JYLF00000000.1	JYLF00000000.1	JYLF00000000.1	JYLF00000000.1	JYLF00000000.1
Pseudomonas xanthomarina	CCUG 46543	AY970951.1	AM905836.1	AM905872.1	FN554765.1	LT629970.1
Pseudomonas xiamenensis	JCM 13530	DQ088664.1	DQ350612.2	EF596884.1	EF667149.1	Gp0013197
Pseudomonas xinjiangensis	NRRLB-51270	EU286805.1	LT629736.1	LT629736.1	LT629736.1	LT629736.1
Pseudomonas yamanorum	LMG 27247	LT629793.1	LT629793.1	LT629793.1	LT629793.1	LT629793.1
Pseudomonas yangmingensis	DSM 24213	FOUI00000000.1	FOUI00000000.1	FOUI00000000.1	FOUI00000000.1	FOUI00000000.1
Pseudomonas zeshuii	KACC 15471	JN411093.1	FQYS00000000.1	FQYS00000000.1	FQYS00000000.1	FQYS00000000.1
Pseudomonas zhaodongensis	DSM 27559	JQ762275.1	KP151495.1	KP151499.1	RFFM00000000.1	RFFM00000000.1.1
Azotobacter beijerinckii	ICMP 8673	FOFJ00000000.1	FOFJ00000000.1	FOFJ00000000.1	FOFJ00000000.1	FOFJ00000000.1
Azotobacter chroococcum	ATCC 9043	SJAA00000000.1	SJAA00000000.1	SJAA00000000.1	SJAA00000000.1	SJAA00000000.1
Azomonas agilis	DSM 375	VLKG00000000.1	VLKG00000000.1	VLKG00000000.1	VLKG00000000.1	VLKG00000000.1
Entomomonas moraniae	QZS01	CP029822.1	CP029822.1	CP029822.1	CP029822.1	CP029822.1
Oblitimonas alkaliphila	B4199	KP986583.1	CP012358.1	CP012358.1	CP012358.1	CP012358.1
Thiopseudomonas denitrificans	X2	KJ567598.1	LNJZ00000000.1	LNJZ00000000.1	LNJZ00000000.1	LNJZ00000000.1
Thiopseudomonas denitrificans	DSM 28679	SNYK00000000.1	SNYK00000000.1	SNYK00000000.1	SNYK00000000.1	SNYK00000000.1
Ventosimonas gracilis	CV58	KT258896.1	LSZO00000000.1	LSZO00000000.1	LSZO00000000.1	LSZO00000000.1
Cellvibrio japonicus	Ueda107	CP000934.1	CP000934.1	CP000934.1	CP000934.1	CP000934.1
Escherichia coli	ATCC 11775= DSM 30083	X80725.1	CP033092.2	CP033092.2	CP033092.2	CP033092.2
