# Supplementary material for: Genomics in Bacterial Taxonomy: Impact on the Genus Pseudomonas
Source: Genes (Basel). 2020 Jan 29;11(2):139. doi: 10.3390/genes11020139 (PMC7074058; doi:10.3390/genes11020139)
Supplement: Supplementary file 1 [file genes-11-00139-s001.zip › TableS2_16S rDNA 140120_MG.xlsx]

## Sheet: Hoja1
	Suplemmentary Table S2. 16S rDNA similarity matrix for all species and subspecies of Pseudomonas type strains studied; closest-genera were also included.
		1	2	3	4	5	6	7	8	9	10	11	12	13	14	15	16	17	18	19	20	21	22	23	24	25	26	27	28	29	30	31	32	33	34	35	36	37	38	39	40	41	42	43	44	45	46	47	48
1	P. lurida	100	97.6902	99.6746	99.4297	98.8502	99.4287	99.5931	99.8375	98.8549	99.3478	98.7725	99.7561	99.6746	98.9347	98.6061	99.1011	99.3478	99.1018	99.1839	99.7561	99.3478	99.2659	99.5931	99.1018	98.3588	98.2758	99.0196	99.1018	98.6899	98.5233	98.4379	98.7725	99.1011	98.9373	98.6888	98.6899	97.8576	97.9428	98.0098	97.6902	98.2758	98.1095	97.9188	98.0262	98.1079	98.9373	98.9373	98.6899
2	P. taetrolens	97.6902	100	97.8576	98.1079	97.2588	97.9377	97.774	97.6902	97.6064	98.0246	97.774	97.774	97.6902	98.0197	97.6044	97.9394	98.0246	98.1079	97.774	97.774	97.8576	97.774	97.774	97.6064	97.1859	97.1015	97.1859	97.1015	97.1859	97.0991	97.4321	97.8576	97.7721	97.6064	97.1835	97.1859	98.6878	98.4404	98.9277	100	99.1011	98.9364	98.9241	98.854	98.9356	98.2744	98.2744	98.3574
3	P. simiae	99.6746	97.8576	100	99.5931	98.7674	99.7557	99.2659	99.6746	99.0196	99.6746	98.9373	99.9188	99.8375	99.0996	98.5233	99.4292	99.6746	99.4297	99.3478	99.9188	99.5114	99.1018	99.4297	99.4297	98.2758	98.1927	98.9373	98.8549	98.4417	98.2744	98.1882	98.6899	99.0188	98.8549	98.4404	98.4417	98.0246	98.0262	98.1777	97.8576	98.4417	98.2758	98.0875	98.1927	98.2744	98.9373	98.9373	98.7725
4	P. canadensis	99.4297	98.1079	99.5931	100	98.7674	99.5106	99.0196	99.4297	99.2659	99.2659	99.1839	99.5114	99.4297	98.7695	98.5233	99.1832	99.2659	99.0196	99.1839	99.5114	99.1018	98.8549	99.1839	99.0196	98.2758	98.1927	98.9373	98.8549	98.4417	98.2744	98.1882	98.6899	99.0188	98.8549	98.4404	98.4417	98.2744	98.0262	98.4288	98.1079	98.6899	98.5245	98.3397	98.4417	98.5233	98.6899	98.6899	98.7725
5	P. azotoformans	98.8502	97.2588	98.7674	98.7674	100	98.516	98.4353	98.8502	98.2687	98.4353	98.2687	98.6845	98.6015	98.0131	98.434	98.434	98.4353	98.1852	98.2687	98.6845	98.2687	98.2687	98.6015	98.352	99.1805	99.0981	99.8368	99.7551	99.3452	99.1799	99.2611	98.7674	98.9321	98.7674	99.3446	99.3452	97.7647	98.1852	97.5784	97.2588	97.8505	97.6826	97.6554	97.5985	97.6807	98.1852	98.1852	97.9343
6	P. extremorientalis	99.4287	97.9377	99.7557	99.5106	98.516	100	99.018	99.4287	98.7705	99.4287	98.6878	99.6741	99.5924	99.1805	98.6038	99.1819	99.4287	99.5106	99.2647	99.6741	99.5924	99.1826	99.5106	99.1826	98.3561	98.273	98.6878	98.605	98.1897	98.0213	97.9343	98.4392	98.7695	98.605	98.1882	98.1897	97.7703	97.7721	98.2586	97.9377	98.1897	98.0229	97.9999	97.9394	98.0213	99.018	99.018	98.8531
7	P. aylmerense	99.5931	97.774	99.2659	99.0196	98.4353	99.018	100	99.4297	98.4417	99.2659	98.6899	99.3478	99.2659	99.0172	98.6888	99.1832	99.4297	99.1839	99.2659	99.3478	99.1018	99.0196	99.1839	99.0196	98.2758	98.1927	98.6073	98.6899	98.7725	98.6061	98.5209	98.8549	99.1832	99.0196	98.7715	98.7725	97.9411	98.0262	98.0938	97.774	98.3588	98.1927	98.0032	98.1095	98.1912	99.0196	99.0196	98.7725
8	P. costantinii	99.8375	97.6902	99.6746	99.4297	98.8502	99.4287	99.4297	100	98.8549	99.3478	98.7725	99.5931	99.5114	98.7695	98.4404	99.1011	99.3478	99.1018	99.0196	99.5931	99.1839	99.2659	99.5931	99.1018	98.3588	98.2758	99.0196	98.9373	98.5245	98.3574	98.2715	98.6073	98.9364	98.7725	98.5233	98.5245	97.8576	97.9428	98.0098	97.6902	98.2758	98.1095	97.9188	98.0262	98.1079	98.9373	98.9373	98.6899
9	P. salomonii	98.8549	97.6064	99.0196	99.2659	98.2687	98.7705	98.4417	98.8549	100	98.8549	98.7725	98.9373	99.0196	98.3547	98.0246	98.6888	98.7725	98.5245	98.4417	98.9373	98.6073	98.4417	98.7725	98.6073	97.8593	97.7758	98.3588	98.2758	98.0262	97.774	97.6024	98.2758	98.5233	98.6073	98.1079	98.0262	97.774	97.5245	98.0098	97.6064	98.1927	98.0262	97.8344	97.9428	98.0246	98.4417	98.4417	98.5245
10	P. antarctica	99.3478	98.0246	99.6746	99.2659	98.4353	99.4287	99.2659	99.3478	98.8549	100	99.1018	99.5931	99.6746	99.1819	98.6061	99.511	99.7561	99.5114	99.3478	99.5931	99.1839	98.7725	99.1018	99.5931	98.4417	98.3588	98.6073	98.5245	98.5245	98.3574	98.1882	98.7725	99.1011	99.0196	98.5233	98.6073	98.1912	98.1927	98.2615	98.0246	98.6073	98.4417	98.2557	98.3588	98.4404	99.0196	99.0196	98.8549
11	P. fluorescens	98.7725	97.774	98.9373	99.1839	98.2687	98.6878	98.6899	98.7725	98.7725	99.1018	100	98.8549	98.9373	98.5209	98.2744	98.9364	99.0196	98.7725	98.6899	98.8549	98.4417	98.1927	98.5245	98.8549	98.1095	98.0262	98.2758	98.1927	98.1927	98.0246	98.0213	98.4417	98.7715	98.6899	98.1912	98.2758	97.9411	97.6921	98.0938	97.774	98.3588	98.1927	98.0032	98.1095	98.1912	98.4417	98.4417	98.5245
12	P. poae	99.7561	97.774	99.9188	99.5114	98.6845	99.6741	99.3478	99.5931	98.9373	99.5931	98.8549	100	99.9188	99.1819	98.6061	99.3473	99.5931	99.3478	99.4297	100	99.5931	99.0196	99.3478	99.3478	98.1927	98.1095	98.8549	98.9373	98.5245	98.3574	98.2715	98.7725	99.1011	98.9373	98.5233	98.5245	97.9411	97.9428	98.0938	97.774	98.3588	98.1927	98.0032	98.1095	98.1912	98.8549	98.8549	98.6899
13	P. trivialis	99.6746	97.6902	99.8375	99.4297	98.6015	99.5924	99.2659	99.5114	99.0196	99.6746	98.9373	99.9188	100	99.1819	98.6061	99.3473	99.5931	99.3478	99.3478	99.9188	99.5114	98.9373	99.2659	99.4297	98.2758	98.1927	98.7725	98.8549	98.5245	98.3574	98.1882	98.7725	99.1011	99.0196	98.5233	98.6073	97.8576	97.8593	98.0098	97.6902	98.2758	98.1095	97.9188	98.0262	98.1079	98.8549	98.8549	98.6899
14	P. marginalis	98.9347	98.0197	99.0996	98.7695	98.0131	99.1805	99.0172	98.7695	98.3547	99.1819	98.5209	99.1819	99.1819	100	98.7684	99.6736	99.4283	99.5102	99.5921	99.1819	99.4283	98.7695	98.9347	98.9347	98.2715	98.1882	98.1882	98.2715	98.6038	98.3534	98.1001	98.6038	98.8512	98.7695	98.5197	98.4379	97.6845	97.6024	98.1762	98.0197	98.1048	97.9377	97.9136	97.854	97.936	99.0172	99.0172	98.9347
15	P. panacis	98.6061	97.6044	98.5233	98.5233	98.434	98.6038	98.6888	98.4404	98.0246	98.6061	98.2744	98.6061	98.6061	98.7684	100	98.6878	98.854	98.9364	98.5233	98.6061	98.6888	98.3574	98.5233	98.5233	98.6888	98.7715	98.6061	98.6888	98.9364	98.7705	98.5197	99.1832	99.4287	99.2653	98.8531	98.854	97.4364	98.1912	97.924	97.6044	97.8576	97.6902	97.8326	97.6064	97.6883	98.7715	98.7715	98.4404
16	P. grimontii	99.1011	97.9394	99.4292	99.1832	98.434	99.1819	99.1832	99.1011	98.6888	99.511	98.9364	99.3473	99.3473	99.6736	98.6878	100	99.7559	99.511	99.7559	99.3473	99.1011	98.6888	98.854	99.2653	98.3574	98.2744	98.6061	98.5233	98.7715	98.605	98.3534	98.854	99.1003	98.9364	98.6878	98.6888	98.1064	98.0246	98.2601	97.9394	98.5233	98.3574	98.1701	98.2744	98.3561	99.0188	99.0188	98.9364
17	P. extremoaustralis	99.3478	98.0246	99.6746	99.2659	98.4353	99.4287	99.4297	99.3478	98.7725	99.7561	99.0196	99.5931	99.5931	99.4283	98.854	99.7559	100	99.7561	99.5114	99.5931	99.3478	98.9373	99.1018	99.5114	98.3588	98.2758	98.6073	98.5245	98.7725	98.6061	98.3547	99.0196	99.2653	99.1018	98.6888	98.6899	98.1912	98.1927	98.3452	98.0246	98.6073	98.4417	98.2557	98.3588	98.4404	99.2659	99.2659	99.1018
18	P. veronii	99.1018	98.1079	99.4297	99.0196	98.1852	99.5106	99.1839	99.1018	98.5245	99.5114	98.7725	99.3478	99.3478	99.5102	98.9364	99.511	99.7561	100	99.2659	99.3478	99.4297	99.0196	99.1839	99.2659	98.4417	98.3588	98.3588	98.2758	98.5245	98.3574	98.1048	98.8549	99.1832	99.0196	98.6061	98.6073	97.9411	97.9428	98.4288	98.1079	98.3588	98.1927	98.1717	98.1095	98.1912	99.3478	99.3478	99.2659
19	P. rhodesiae	99.1839	97.774	99.3478	99.1839	98.2687	99.2647	99.2659	99.0196	98.4417	99.3478	98.6899	99.4297	99.3478	99.5921	98.5233	99.7559	99.5114	99.2659	100	99.4297	99.1839	98.6073	98.7725	99.1018	98.1095	98.0262	98.4417	98.5245	98.6073	98.4404	98.3547	98.6899	99.0188	98.8549	98.6061	98.6073	97.9411	97.8593	98.0938	97.774	98.3588	98.1927	98.0032	98.1095	98.1912	98.7725	98.7725	98.6899
20	P. kairouanensis	99.7561	97.774	99.9188	99.5114	98.6845	99.6741	99.3478	99.5931	98.9373	99.5931	98.8549	100	99.9188	99.1819	98.6061	99.3473	99.5931	99.3478	99.4297	100	99.5931	99.0196	99.3478	99.3478	98.1927	98.1095	98.8549	98.9373	98.5245	98.3574	98.2715	98.7725	99.1011	98.9373	98.5233	98.5245	97.9411	97.9428	98.0938	97.774	98.3588	98.1927	98.0032	98.1095	98.1912	98.8549	98.8549	98.6899
21	P. nabeulensis	99.3478	97.8576	99.5114	99.1018	98.2687	99.5924	99.1018	99.1839	98.6073	99.1839	98.4417	99.5931	99.5114	99.4283	98.6888	99.1011	99.3478	99.4297	99.1839	99.5931	100	99.1839	99.3478	98.9373	98.1095	98.0262	98.4417	98.5245	98.3588	98.1079	98.0213	98.5245	98.854	98.7725	98.3574	98.2758	97.6902	97.6921	98.1777	97.8576	98.1095	97.9428	97.9188	97.8593	97.9411	98.9373	98.9373	98.7725
22	P. palleroniana	99.2659	97.774	99.1018	98.8549	98.2687	99.1826	99.0196	99.2659	98.4417	98.7725	98.1927	99.0196	98.9373	98.7695	98.3574	98.6888	98.9373	99.0196	98.6073	99.0196	99.1839	100	99.6746	98.5245	98.1095	98.0262	98.4417	98.3588	98.1927	97.9411	98.0213	98.1927	98.5233	98.5245	98.2744	98.1095	97.6064	97.6921	98.0938	97.774	98.0262	97.8593	97.8344	97.7758	97.8576	98.8549	98.8549	98.6073
23	P. tolaasii	99.5931	97.774	99.4297	99.1839	98.6015	99.5106	99.1839	99.5931	98.7725	99.1018	98.5245	99.3478	99.2659	98.9347	98.5233	98.854	99.1018	99.1839	98.7725	99.3478	99.3478	99.6746	100	98.8549	98.4417	98.3588	98.7725	98.6899	98.3588	98.1079	98.0213	98.3588	98.6888	98.6899	98.4404	98.2758	97.6064	97.6921	98.0938	97.774	98.0262	97.8593	97.8344	97.7758	97.8576	99.0196	99.0196	98.7725
24	P. orientales	99.1018	97.6064	99.4297	99.0196	98.352	99.1826	99.0196	99.1018	98.6073	99.5931	98.8549	99.3478	99.4297	98.9347	98.5233	99.2653	99.5114	99.2659	99.1018	99.3478	98.9373	98.5245	98.8549	100	98.8549	98.7725	98.5245	98.4417	98.4417	98.2744	98.1048	98.6899	99.0188	98.9373	98.4404	98.5245	97.774	97.9428	97.9258	97.6064	98.1927	98.0262	97.8344	97.9428	98.0246	98.7725	98.7725	98.6073
25	P. cedrina subsp. cedrina	98.3588	97.1859	98.2758	98.2758	99.1805	98.3561	98.2758	98.3588	97.8593	98.4417	98.1095	98.1927	98.2758	98.2715	98.6888	98.3574	98.3588	98.4417	98.1095	98.1927	98.1095	98.1095	98.4417	98.8549	100	99.9188	99.3478	99.2659	99.2659	99.1011	98.9347	98.5245	98.854	98.7725	99.2653	99.3478	97.3544	97.7758	97.5039	97.1859	97.4406	97.2724	97.4107	97.1882	97.2702	98.2758	98.2758	97.9428
26	P. cedrina subsp. fulgida	98.2758	97.1015	98.1927	98.1927	99.0981	98.273	98.1927	98.2758	97.7758	98.3588	98.0262	98.1095	98.1927	98.1882	98.7715	98.2744	98.2758	98.3588	98.0262	98.1095	98.0262	98.0262	98.3588	98.7725	99.9188	100	99.2659	99.1839	99.1839	99.0188	98.8521	98.4417	98.7715	98.6899	99.1832	99.2659	97.2702	97.6921	97.4193	97.1015	97.3566	97.1882	97.3256	97.1039	97.1859	98.1927	98.1927	97.8593
27	P. lactis	99.0196	97.1859	98.9373	98.9373	99.8368	98.6878	98.6073	99.0196	98.3588	98.6073	98.2758	98.8549	98.7725	98.1882	98.6061	98.6061	98.6073	98.3588	98.4417	98.8549	98.4417	98.4417	98.7725	98.5245	99.3478	99.2659	100	99.9188	99.5114	99.3473	99.2641	98.7725	99.1011	98.9373	99.511	99.5114	97.6902	98.1095	97.5039	97.1859	97.7758	97.6084	97.5804	97.5245	97.6064	98.1927	98.1927	97.8593
28	P. paralactis	99.1018	97.1015	98.8549	98.8549	99.7551	98.605	98.6899	98.9373	98.2758	98.5245	98.1927	98.9373	98.8549	98.2715	98.6888	98.5233	98.5245	98.2758	98.5245	98.9373	98.5245	98.3588	98.6899	98.4417	99.2659	99.1839	99.9188	100	99.5931	99.4292	99.3462	98.8549	99.1832	99.0196	99.5927	99.5931	97.6064	98.0262	97.4193	97.1015	97.6921	97.5245	97.4956	97.4406	97.5225	98.1095	98.1095	97.7758
29	P. libaniensis	98.6899	97.1859	98.4417	98.4417	99.3452	98.1897	98.7725	98.5245	98.0262	98.5245	98.1927	98.5245	98.5245	98.6038	98.9364	98.7715	98.7725	98.5245	98.6073	98.5245	98.3588	98.1927	98.3588	98.4417	99.2659	99.1839	99.5114	99.5931	100	99.6744	99.4283	99.1018	99.3473	99.2659	99.8374	99.7561	97.6902	98.1095	97.5039	97.1859	97.7758	97.6084	97.5804	97.5245	97.6064	98.3588	98.3588	98.0262
30	P. synxantha	98.5233	97.0991	98.2744	98.2744	99.1799	98.0213	98.6061	98.3574	97.774	98.3574	98.0246	98.3574	98.3574	98.3534	98.7705	98.605	98.6061	98.3574	98.4404	98.3574	98.1079	97.9411	98.1079	98.2744	99.1011	99.0188	99.3473	99.4292	99.6744	100	99.3457	98.9364	99.1826	99.0188	99.5924	99.5927	97.5204	97.9411	97.3323	97.0991	97.6064	97.4385	97.4085	97.3544	97.4364	98.1912	98.1912	97.8576
31	P. mucidolens	98.4379	97.4321	98.1882	98.1882	99.2611	97.9343	98.5209	98.2715	97.6024	98.1882	98.0213	98.2715	98.1882	98.1001	98.5197	98.3534	98.3547	98.1048	98.3547	98.2715	98.0213	98.0213	98.0213	98.1048	98.9347	98.8521	99.2641	99.3462	99.4283	99.3457	100	98.6867	99.0164	98.8521	99.4278	99.4283	97.6005	98.0213	97.4128	97.4321	97.6864	97.5184	97.4893	97.4342	97.5163	97.9377	97.9377	97.6024
32	P. yamanorum	98.7725	97.8576	98.6899	98.6899	98.7674	98.4392	98.8549	98.6073	98.2758	98.7725	98.4417	98.7725	98.7725	98.6038	99.1832	98.854	99.0196	98.8549	98.6899	98.7725	98.5245	98.1927	98.3588	98.6899	98.5245	98.4417	98.7725	98.8549	99.1018	98.9364	98.6867	100	99.6744	99.5114	99.1011	99.1018	98.0246	98.7725	98.1777	97.8576	98.4417	98.2758	98.2557	98.1927	98.2744	99.0196	99.0196	98.9373
33	P. brenneri	99.1011	97.7721	99.0188	99.0188	98.9321	98.7695	99.1832	98.9364	98.5233	99.1011	98.7715	99.1011	99.1011	98.8512	99.4287	99.1003	99.2653	99.1832	99.0188	99.1011	98.854	98.5233	98.6888	99.0188	98.854	98.7715	99.1011	99.1832	99.3473	99.1826	99.0164	99.6744	100	99.9187	99.4292	99.511	97.9394	98.6888	98.0922	97.7721	98.3574	98.1912	98.1701	98.1079	98.1897	98.854	98.854	98.6061
34	P. proteolytica	98.9373	97.6064	98.8549	98.8549	98.7674	98.605	99.0196	98.7725	98.6073	99.0196	98.6899	98.9373	99.0196	98.7695	99.2653	98.9364	99.1018	99.0196	98.8549	98.9373	98.7725	98.5245	98.6899	98.9373	98.7725	98.6899	98.9373	99.0196	99.2659	99.0188	98.8521	99.5114	99.9187	100	99.511	99.4297	97.774	98.5245	97.9258	97.6064	98.1927	98.0262	98.0032	97.9428	98.0246	98.6899	98.6899	98.4417
35	P. gessardii	98.6888	97.1835	98.4404	98.4404	99.3446	98.1882	98.7715	98.5233	98.1079	98.5233	98.1912	98.5233	98.5233	98.5197	98.8531	98.6878	98.6888	98.6061	98.6061	98.5233	98.3574	98.2744	98.4404	98.4404	99.2653	99.1832	99.511	99.5927	99.8374	99.5924	99.4278	99.1011	99.4292	99.511	100	99.9187	97.6883	98.1079	97.5019	97.1835	97.774	97.6064	97.5784	97.5225	97.6044	98.2744	98.2744	98.0246
36	P. meridiana	98.6899	97.1859	98.4417	98.4417	99.3452	98.1897	98.7725	98.5245	98.0262	98.6073	98.2758	98.5245	98.6073	98.4379	98.854	98.6888	98.6899	98.6073	98.6073	98.5245	98.2758	98.1095	98.2758	98.5245	99.3478	99.2659	99.5114	99.5931	99.7561	99.5927	99.4283	99.1018	99.511	99.4297	99.9187	100	97.6902	98.1095	97.5039	97.1859	97.7758	97.6084	97.5804	97.5245	97.6064	98.2758	98.2758	98.0262
37	P. endophytica	97.8576	98.6878	98.0246	98.2744	97.7647	97.7703	97.9411	97.8576	97.774	98.1912	97.9411	97.9411	97.8576	97.6845	97.4364	98.1064	98.1912	97.9411	97.9411	97.9411	97.6902	97.6064	97.6064	97.774	97.3544	97.2702	97.6902	97.6064	97.6902	97.5204	97.6005	98.0246	97.9394	97.774	97.6883	97.6902	100	99.2653	99.1765	98.6878	99.5927	99.7559	99.588	99.511	99.7557	98.1079	98.1079	98.1912
38	P. helleri	97.9428	98.4404	98.0262	98.0262	98.1852	97.7721	98.0262	97.9428	97.5245	98.1927	97.6921	97.9428	97.8593	97.6024	98.1912	98.0246	98.1927	97.9428	97.8593	97.9428	97.6921	97.6921	97.6921	97.9428	97.7758	97.6921	98.1095	98.0262	98.1095	97.9411	98.0213	98.7725	98.6888	98.5245	98.1079	98.1095	99.2653	100	98.9286	98.4404	99.1839	99.5114	99.5058	99.2659	99.511	98.2758	98.2758	97.9428
39	P. lundensis	98.0098	98.9277	98.1777	98.4288	97.5784	98.2586	98.0938	98.0098	98.0098	98.2615	98.0938	98.0938	98.0098	98.1762	97.924	98.2601	98.3452	98.4288	98.0938	98.0938	98.1777	98.0938	98.0938	97.9258	97.5039	97.4193	97.5039	97.4193	97.5039	97.3323	97.4128	98.1777	98.0922	97.9258	97.5019	97.5039	99.1765	98.9286	100	98.9277	99.1772	99.425	99.4183	99.2599	99.4245	98.5958	98.5958	98.6791
40	P. taetrolens	97.6902	100	97.8576	98.1079	97.2588	97.9377	97.774	97.6902	97.6064	98.0246	97.774	97.774	97.6902	98.0197	97.6044	97.9394	98.0246	98.1079	97.774	97.774	97.8576	97.774	97.774	97.6064	97.1859	97.1015	97.1859	97.1015	97.1859	97.0991	97.4321	97.8576	97.7721	97.6064	97.1835	97.1859	98.6878	98.4404	98.9277	100	99.1011	98.9364	98.9241	98.854	98.9356	98.2744	98.2744	98.3574
41	P. versuta	98.2758	99.1011	98.4417	98.6899	97.8505	98.1897	98.3588	98.2758	98.1927	98.6073	98.3588	98.3588	98.2758	98.1048	97.8576	98.5233	98.6073	98.3588	98.3588	98.3588	98.1095	98.0262	98.0262	98.1927	97.4406	97.3566	97.7758	97.6921	97.7758	97.6064	97.6864	98.4417	98.3574	98.1927	97.774	97.7758	99.5927	99.1839	99.1772	99.1011	100	99.6746	99.5058	99.5931	99.6744	98.5245	98.5245	98.6073
42	P. weihenstephanensis	98.1095	98.9364	98.2758	98.5245	97.6826	98.0229	98.1927	98.1095	98.0262	98.4417	98.1927	98.1927	98.1095	97.9377	97.6902	98.3574	98.4417	98.1927	98.1927	98.1927	97.9428	97.8593	97.8593	98.0262	97.2724	97.1882	97.6084	97.5245	97.6084	97.4385	97.5184	98.2758	98.1912	98.0262	97.6064	97.6084	99.7559	99.5114	99.425	98.9364	99.6746	100	99.8356	99.7561	100	98.3588	98.3588	98.4417
43	P. fragi	97.9188	98.9241	98.0875	98.3397	97.6554	97.9999	98.0032	97.9188	97.8344	98.2557	98.0032	98.0032	97.9188	97.9136	97.8326	98.1701	98.2557	98.1717	98.0032	98.0032	97.9188	97.8344	97.8344	97.8344	97.4107	97.3256	97.5804	97.4956	97.5804	97.4085	97.4893	98.2557	98.1701	98.0032	97.5784	97.5804	99.588	99.5058	99.4183	98.9241	99.5058	99.8356	100	99.7533	99.8355	98.4236	98.4236	98.4236
44	P. decepcionensis	98.0262	98.854	98.1927	98.4417	97.5985	97.9394	98.1095	98.0262	97.9428	98.3588	98.1095	98.1095	98.0262	97.854	97.6064	98.2744	98.3588	98.1095	98.1095	98.1095	97.8593	97.7758	97.7758	97.9428	97.1882	97.1039	97.5245	97.4406	97.5245	97.3544	97.4342	98.1927	98.1079	97.9428	97.5225	97.5245	99.511	99.2659	99.2599	98.854	99.5931	99.7561	99.7533	100	99.7559	98.2758	98.2758	98.3588
45	P. psychrophila	98.1079	98.9356	98.2744	98.5233	97.6807	98.0213	98.1912	98.1079	98.0246	98.4404	98.1912	98.1912	98.1079	97.936	97.6883	98.3561	98.4404	98.1912	98.1912	98.1912	97.9411	97.8576	97.8576	98.0246	97.2702	97.1859	97.6064	97.5225	97.6064	97.4364	97.5163	98.2744	98.1897	98.0246	97.6044	97.6064	99.7557	99.511	99.4245	98.9356	99.6744	100	99.8355	99.7559	100	98.3574	98.3574	98.4404
46	P. arsenicoxydans	98.9373	98.2744	98.9373	98.6899	98.1852	99.018	99.0196	98.9373	98.4417	99.0196	98.4417	98.8549	98.8549	99.0172	98.7715	99.0188	99.2659	99.3478	98.7725	98.8549	98.9373	98.8549	99.0196	98.7725	98.2758	98.1927	98.1927	98.1095	98.3588	98.1912	97.9377	99.0196	98.854	98.6899	98.2744	98.2758	98.1079	98.2758	98.5958	98.2744	98.5245	98.3588	98.4236	98.2758	98.3574	100	100	99.5114
47	P. mandelii	98.9373	98.2744	98.9373	98.6899	98.1852	99.018	99.0196	98.9373	98.4417	99.0196	98.4417	98.8549	98.8549	99.0172	98.7715	99.0188	99.2659	99.3478	98.7725	98.8549	98.9373	98.8549	99.0196	98.7725	98.2758	98.1927	98.1927	98.1095	98.3588	98.1912	97.9377	99.0196	98.854	98.6899	98.2744	98.2758	98.1079	98.2758	98.5958	98.2744	98.5245	98.3588	98.4236	98.2758	98.3574	100	100	99.5114
48	P. frederiksbergesis	98.6899	98.3574	98.7725	98.7725	97.9343	98.8531	98.7725	98.6899	98.5245	98.8549	98.5245	98.6899	98.6899	98.9347	98.4404	98.9364	99.1018	99.2659	98.6899	98.6899	98.7725	98.6073	98.7725	98.6073	97.9428	97.8593	97.8593	97.7758	98.0262	97.8576	97.6024	98.9373	98.6061	98.4417	98.0246	98.0262	98.1912	97.9428	98.6791	98.3574	98.6073	98.4417	98.4236	98.3588	98.4404	99.5114	99.5114	100
49	P. prosekii	98.8549	98.1912	98.8549	98.6073	98.1017	98.9356	98.9373	98.8549	98.3588	98.9373	98.3588	98.7725	98.7725	98.9347	98.6888	98.9364	99.1839	99.2659	98.6899	98.7725	98.8549	98.7725	98.9373	98.6899	98.1927	98.1095	98.1095	98.0262	98.2758	98.1079	97.854	98.9373	98.7715	98.6073	98.1912	98.1927	98.0246	98.1927	98.5123	98.1912	98.4417	98.2758	98.3397	98.1927	98.2744	99.9188	99.9188	99.4297
50	P. gregormendelii	98.8549	98.1912	98.8549	98.6073	98.1017	98.9356	98.9373	98.8549	98.3588	98.9373	98.3588	98.7725	98.7725	98.9347	98.6888	98.9364	99.1839	99.2659	98.6899	98.7725	98.8549	98.7725	98.9373	98.6899	98.1927	98.1095	98.1095	98.0262	98.2758	98.1079	97.854	98.9373	98.7715	98.6073	98.1912	98.1927	98.0246	98.1927	98.5123	98.1912	98.4417	98.2758	98.3397	98.1927	98.2744	99.9188	99.9188	99.4297
51	P. silesiensis	98.9373	98.2744	98.9373	98.6899	98.1852	99.018	99.0196	98.9373	98.4417	99.0196	98.4417	98.8549	98.8549	99.0172	98.7715	99.0188	99.2659	99.3478	98.7725	98.8549	98.9373	98.8549	99.0196	98.7725	98.2758	98.1927	98.1927	98.1095	98.3588	98.1912	97.9377	99.0196	98.854	98.6899	98.2744	98.2758	98.1079	98.2758	98.5958	98.2744	98.5245	98.3588	98.4236	98.2758	98.3574	100	100	99.5114
52	P. lini	98.7725	98.0246	98.7725	98.5245	98.0181	98.8531	98.8549	98.7725	98.3588	98.8549	98.2758	98.6899	98.6899	98.9347	98.6061	98.854	99.1018	99.2659	98.6073	98.6899	98.8549	98.7725	98.9373	98.6073	98.1095	98.0262	98.0262	97.9428	98.3588	98.0246	97.7703	99.1018	98.7715	98.6899	98.2744	98.1927	97.8576	98.0262	98.3452	98.0246	98.2758	98.1095	98.1717	98.0262	98.1079	99.7561	99.7561	99.5931
53	P. migulae	98.4417	98.1079	98.5245	98.5245	98.6015	98.605	98.5245	98.4417	98.5245	98.6899	98.3588	98.4417	98.5245	98.6038	99.1011	98.6061	98.7725	98.8549	98.3588	98.4417	98.6073	98.5245	98.6899	98.6073	98.7725	98.6899	98.6073	98.5245	98.7725	98.5233	98.3547	99.3478	99.2653	99.3478	98.854	98.7725	97.9411	98.6899	98.4288	98.1079	98.3588	98.1927	98.3397	98.1095	98.1912	99.3478	99.3478	98.9373
54	P. granadensis	97.5225	97.3522	97.3566	97.5225	98.6004	97.6024	97.6064	97.5225	97.1015	97.4385	97.1015	97.3544	97.2702	97.6005	97.9394	97.6044	97.6064	97.774	97.5225	97.3544	97.5225	97.774	97.774	97.3544	98.5233	98.4404	98.5233	98.4404	98.6061	98.3561	98.4366	98.4404	98.1897	98.1912	98.7705	98.6061	97.5204	97.9411	97.671	97.3522	97.6064	97.4385	97.5784	97.3544	97.4364	97.9411	97.9411	98.0246
55	P. moraviensis	97.6064	97.6044	97.4406	97.6064	98.2672	97.6864	97.6902	97.6064	97.1859	97.5225	97.1859	97.4385	97.3544	97.6845	97.7721	97.6883	97.6902	97.774	97.6064	97.4385	97.6064	97.8576	97.8576	97.4385	98.1912	98.1079	98.1912	98.1079	98.2744	98.0229	98.1033	98.0246	97.9394	97.9411	98.3561	98.1912	97.7721	97.9411	97.924	97.6044	97.8576	97.6902	97.748	97.6064	97.6883	98.1912	98.1912	97.9411
56	P. koreensis	97.6902	97.5204	97.5245	97.6902	98.7664	97.7703	97.774	97.6902	97.2702	97.774	97.4385	97.5225	97.6064	97.7684	98.1897	97.8558	97.8576	97.9411	97.6902	97.5225	97.6064	97.6064	97.774	97.6902	98.854	98.7715	98.6888	98.6061	98.7715	98.605	98.4366	98.4404	98.3561	98.2744	98.7705	98.854	97.6883	98.1079	97.8398	97.5204	97.774	97.6064	97.748	97.5225	97.6044	98.2744	98.2744	97.9411
57	P. kribbensis	97.5204	97.4342	97.3544	97.5204	98.5992	97.6005	97.6044	97.5204	97.0991	97.4364	97.0991	97.3522	97.2679	97.5985	97.9377	97.6024	97.6044	97.7721	97.5204	97.3522	97.5204	97.7721	97.7721	97.3522	98.5221	98.4392	98.5221	98.4392	98.605	98.3547	98.4353	98.4392	98.1882	98.1897	98.7695	98.605	97.6024	98.0229	97.7536	97.4342	97.6883	97.5204	97.6613	97.4364	97.5184	97.9394	97.9394	97.9394
58	P. baetica	98.1079	97.9394	98.1095	98.2744	98.2672	98.3547	98.1912	98.1079	97.8576	98.1912	97.8576	98.1079	98.0246	98.1867	98.6878	98.1897	98.3574	98.4404	98.1079	98.1079	98.2744	98.3574	98.3574	98.1079	98.2744	98.1912	98.2744	98.1912	98.3574	98.1064	98.1867	98.9364	98.8531	98.854	98.4392	98.2744	97.7721	98.5233	98.2601	97.9394	98.1912	98.0246	98.1701	97.9411	98.0229	98.7715	98.7715	98.3574
59	P. helmanticensis	98.1079	98.1064	98.1095	98.2744	98.0164	98.3547	98.1912	98.1079	97.6902	98.1912	97.8576	98.1079	98.0246	98.1033	98.3561	98.1897	98.3574	98.5233	98.1079	98.1079	98.1912	98.1912	98.1912	98.1079	97.9411	97.8576	97.9411	97.8576	97.9411	97.7721	97.8523	98.854	98.605	98.4404	98.0229	98.0246	97.9394	98.3574	98.4275	98.1064	98.3574	98.1912	98.3383	98.1079	98.1897	98.6888	98.6888	98.7715
60	P. mohnii	98.4288	98.0082	98.3466	98.5123	98.8407	98.5935	98.5123	98.4288	98.1777	98.5958	98.2615	98.3452	98.4288	98.6758	98.8445	98.678	98.6791	98.7623	98.5123	98.3452	98.5123	98.4288	98.5958	98.5123	99.0115	98.9286	98.8455	98.7623	99.0115	98.7613	98.5923	99.0944	99.0107	99.0115	99.0107	99.0115	98.0082	98.4288	98.3314	98.0082	98.2615	98.0938	98.2411	98.0098	98.0922	99.0944	99.0944	98.6791
61	P. moorei	98.5012	97.9084	98.4184	98.5853	98.916	98.4987	98.5853	98.5012	98.164	98.5012	98.164	98.417	98.3328	98.4974	98.7521	98.6681	98.6692	98.5853	98.5853	98.417	98.417	98.417	98.5853	98.417	98.7531	98.7531	98.9205	98.8369	99.0041	98.7521	98.6659	99.0876	99.0033	99.0041	99.0869	98.9205	98.0779	98.5012	98.2337	97.9084	98.3328	98.164	98.1455	98.0795	98.1625	98.9205	98.9205	98.5012
62	P. reinekei	97.8558	97.35	97.6902	97.8558	98.8483	97.936	97.9394	97.8558	97.4364	97.7721	97.4364	97.6883	97.6044	97.9343	98.2715	97.9377	97.9394	98.0229	97.8558	97.6883	97.8558	97.9394	98.1064	97.6883	98.8531	98.7705	98.8531	98.7705	98.9356	98.6867	98.6015	98.5221	98.4379	98.4392	99.0172	98.8531	97.6024	98.0229	97.671	97.35	97.6044	97.5204	97.6613	97.3522	97.5184	98.3561	98.3561	97.9394
63	P. umsongensis	98.3574	98.0229	98.3588	98.5233	98.5172	98.6038	98.4404	98.3574	97.9411	98.4404	98.1079	98.3574	98.2744	98.3534	98.9356	98.4392	98.6061	98.6888	98.3574	98.3574	98.4404	98.2744	98.4404	98.3574	98.5233	98.4404	98.5233	98.4404	98.5233	98.3561	98.2701	99.1832	99.1003	98.9364	98.5221	98.5233	97.8558	98.6061	98.3438	98.0229	98.2744	98.1079	98.2543	98.0246	98.1064	99.0188	99.0188	98.6061
64	P. vancouverensis	97.774	97.2679	97.6084	97.774	98.7664	97.854	97.8576	97.774	97.3544	97.6902	97.3544	97.6064	97.5225	97.8523	98.1897	97.8558	97.8576	97.9411	97.774	97.6064	97.774	97.8576	98.0246	97.6064	98.7715	98.6888	98.7715	98.6888	98.854	98.605	98.5197	98.4404	98.3561	98.3574	98.9356	98.7715	97.4364	97.8576	97.5865	97.2679	97.5225	97.3544	97.4935	97.2702	97.3522	98.2744	98.2744	97.8576
65	P. laurylsulfatovorans	98.0246	97.6883	98.0262	98.1912	98.1837	98.2715	98.1079	98.0246	97.8576	98.2744	97.9411	98.0246	98.1079	98.1867	98.6878	98.1897	98.3574	98.4404	98.0246	98.0246	98.1912	98.0246	98.1912	98.1912	98.3574	98.2744	98.1912	98.1079	98.4404	98.1064	97.936	98.9364	98.8531	98.854	98.3561	98.3574	97.5204	98.2744	98.0082	97.6883	97.9411	97.774	97.9171	97.6902	97.7721	98.7715	98.7715	98.3574
66	P. jessenii	98.3507	97.8469	98.1852	98.3507	98.7613	98.4314	98.434	98.3507	97.7647	98.2672	97.9326	98.1837	98.1001	98.3466	98.6824	98.4327	98.434	98.5172	98.3507	98.1837	98.2672	98.2672	98.434	98.1837	98.7664	98.6835	98.7664	98.6835	98.7664	98.5992	98.5136	98.9321	98.8483	98.6835	98.7654	98.7664	97.7629	98.3507	98.1686	97.8469	98.1001	97.9326	98.0779	97.8487	97.9309	98.8493	98.8493	98.434
67	P. laurylsulfatiphila	98.1079	98.0229	98.1927	98.6061	97.5965	98.4379	98.1912	98.1079	98.3574	98.4404	98.3574	98.1912	98.2744	98.4366	98.1064	98.4392	98.5233	98.6888	98.2744	98.1912	98.3574	98.1912	98.3574	98.1912	97.774	97.6902	97.6064	97.5225	97.774	97.5204	97.3478	98.6061	98.3561	98.4404	97.9394	97.8576	97.8558	97.6064	98.3438	98.0229	98.2744	98.1079	98.0859	98.0246	98.1064	98.6888	98.6888	99.0188
68	P. brassicacearum subsp. brassicaceatum	98.1912	98.273	98.1912	98.4404	97.5965	98.2715	98.2744	98.0246	98.4404	98.3574	98.2744	98.2744	98.3574	98.6856	98.1897	98.3561	98.4404	98.6061	98.2744	98.2744	98.4404	98.1079	98.2744	98.1079	97.6902	97.6064	97.5225	97.6064	97.8576	97.6044	97.4321	98.6888	98.4392	98.5233	98.0229	97.9411	97.8558	97.6064	98.5111	98.273	98.2744	98.1079	98.0859	98.0246	98.1064	98.7715	98.7715	99.2653
69	P. brassicacearum subsp. neoaurantiaca	98.5245	98.3574	98.5245	98.7725	97.9343	98.605	98.6073	98.3588	98.7725	98.6899	98.6073	98.6073	98.6899	98.8521	98.5233	98.6888	98.7725	98.9373	98.6073	98.6073	98.7725	98.4417	98.6073	98.4417	98.0262	97.9428	97.8593	97.9428	98.1927	97.9411	97.7703	99.0196	98.7715	98.8549	98.3574	98.2758	98.1912	97.9428	98.6791	98.3574	98.6073	98.4417	98.4236	98.3588	98.4404	99.1018	99.1018	99.5931
70	P. kilonensis	98.6899	98.5233	98.6899	98.9373	98.0181	98.7705	98.7725	98.5245	98.7725	98.8549	98.7725	98.7725	98.8549	98.9347	98.6888	98.854	98.9373	99.0196	98.7725	98.7725	98.8549	98.4417	98.6073	98.6073	98.1927	98.1095	98.0262	98.1095	98.2758	98.1079	97.9377	98.9373	98.854	98.7725	98.2744	98.3588	98.3574	98.1095	98.8455	98.5233	98.7725	98.6073	98.5911	98.5245	98.6061	99.3478	99.3478	99.3478
71	P. thivervalensis	98.3574	98.1897	98.3574	98.6061	97.9326	98.4379	98.4404	98.1912	98.4404	98.5233	98.4404	98.4404	98.5233	98.6027	98.5221	98.5221	98.6061	98.7715	98.4404	98.4404	98.5233	98.1079	98.2744	98.2744	98.0246	97.9411	97.8576	97.9411	98.1079	97.9394	97.7684	99.0188	98.7705	98.6888	98.1897	98.2744	98.0229	97.9411	98.5111	98.1897	98.4404	98.2744	98.59	98.3574	98.273	99.0188	99.0188	99.4292
72	P. corrugata	98.4404	98.4392	98.6061	98.854	97.9326	98.6867	98.5233	98.4404	98.854	98.7715	98.6888	98.5233	98.6061	98.7684	98.4392	98.7705	98.854	98.9364	98.5233	98.5233	98.6888	98.5233	98.6888	98.5233	98.1079	98.0246	97.9411	97.8576	98.1079	97.8558	97.6845	98.6888	98.605	98.6888	98.1897	98.1079	98.273	98.0246	98.7613	98.4392	98.6888	98.5233	98.5062	98.4404	98.5221	99.2653	99.2653	99.2653
73	P. mediterranea	97.8593	97.5225	98.1927	97.8593	97.3456	98.273	97.9428	97.8593	97.6921	98.1927	97.5245	98.1095	98.0262	98.6867	97.5225	98.6061	98.3588	98.5245	98.5245	98.1095	98.2758	97.9428	98.1095	97.9428	97.2724	97.1882	97.2724	97.1882	97.3566	97.1015	97.0121	98.0262	97.774	97.7758	97.5225	97.3566	97.3544	97.2724	97.7573	97.5225	97.7758	97.6084	97.5804	97.5245	97.6064	98.5245	98.5245	98.8549
74	P. sesami	97.6084	97.9411	97.8593	97.6921	97.2611	97.9394	97.6921	97.6084	97.3566	98.0262	97.3566	97.7758	97.6921	97.9377	97.2702	97.8576	98.0262	98.1095	97.7758	97.7758	97.9428	98.0262	98.0262	97.6084	97.1882	97.1039	97.1882	97.1039	97.2724	97.017	97.0967	97.5245	97.4385	97.4406	97.3544	97.1882	98.1079	97.6084	98.1777	97.9411	98.1927	98.0262	98.0032	97.9428	98.0246	98.1927	98.1927	98.1927
75	P. protegens	97.9428	97.6064	98.2758	97.8593	97.2611	98.0229	98.0262	97.9428	97.5245	98.2758	97.5245	98.1927	98.1095	97.9377	97.2702	98.1912	98.4417	98.1927	98.1095	98.1927	98.0262	98.0262	98.0262	98.0262	96.8504	96.7657	97.1882	97.1039	97.2724	97.017	97.0967	97.8593	97.774	97.7758	97.3544	97.1882	97.774	97.7758	97.9258	97.6064	98.1927	98.0262	97.8344	97.9428	98.0246	98.1927	98.1927	98.0262
76	P. saponiphila	96.7657	96.9324	97.0195	96.8504	96.411	97.0991	96.8504	96.7657	96.511	97.0195	96.511	96.935	96.8504	97.0967	96.4229	97.017	97.1882	97.2724	96.935	96.935	97.1039	97.1882	97.1882	96.7657	96.3407	96.2555	96.3407	96.2555	96.4259	96.1669	96.2461	96.6809	96.5932	96.596	96.5081	96.3407	97.1015	96.596	97.2497	96.9324	97.1882	97.0195	97.0699	96.935	97.017	97.3566	97.3566	97.3566
77	P. chlororaphis subsp. aurantiaca	98.3588	98.2744	98.6073	98.4417	98.0181	98.6878	98.4417	98.3588	98.1095	98.6073	98.1095	98.5245	98.4417	98.6867	98.0246	98.6061	98.7725	98.9373	98.5245	98.5245	98.6899	98.6073	98.7725	98.3588	97.9428	97.8593	97.9428	97.8593	98.0262	97.774	97.6864	98.5245	98.2744	98.2758	98.1912	98.0262	98.4404	97.9428	98.5958	98.2744	98.5245	98.3588	98.3397	98.2758	98.3574	98.8549	98.8549	99.1839
78	P. chlororaphis subsp. aureofaciens	98.1095	98.0246	98.3588	98.1927	97.8505	98.4392	98.1927	98.1095	97.7758	98.3588	97.8593	98.2758	98.1927	98.4379	97.774	98.3574	98.5245	98.6899	98.2758	98.2758	98.4417	98.1095	98.2758	98.1095	97.6921	97.6084	97.6921	97.6084	97.8593	97.5225	97.4342	98.2758	98.0246	97.9428	97.8576	97.7758	98.1912	97.6921	98.3452	98.0246	98.2758	98.1095	98.0875	98.0262	98.1079	98.6073	98.6073	98.9373
79	P. chlororaphis subsp. chlororaphis	97.6864	97.8523	97.9377	97.7703	97.339	98.0181	97.7703	97.6864	97.4342	98.1048	97.6024	97.854	97.9377	98.1837	97.4321	98.0197	98.1882	98.3547	97.854	97.854	97.9377	97.6024	97.7703	97.9377	97.5184	97.4342	97.2656	97.1812	97.35	97.1789	97.0046	97.9377	97.6845	97.6024	97.4321	97.5184	97.7684	97.2656	98.0891	97.8523	97.854	97.6864	97.6593	97.6024	97.6845	98.2715	98.2715	98.6038
80	P. chlororaphis subsp. piscium	98.4417	98.3574	98.6899	98.5245	98.1017	98.7705	98.5245	98.4417	98.0262	98.6899	98.1927	98.6073	98.5245	98.6867	98.1079	98.6888	98.8549	99.0196	98.6073	98.6073	98.6899	98.3588	98.5245	98.4417	98.0262	97.9428	98.0262	97.9428	98.0262	97.8576	97.7703	98.6073	98.3574	98.1927	98.1079	98.1095	98.6888	98.1927	98.8455	98.3574	98.7725	98.6073	98.5911	98.5245	98.6061	98.9373	98.9373	99.2659
81	P. batumici	97.1859	97.0145	97.1039	97.2702	98.0164	97.35	97.1015	97.1859	96.8478	97.017	96.6781	97.1015	97.017	97.1789	97.3522	97.1835	97.1859	97.3544	97.1015	97.1015	97.2702	97.4385	97.4385	96.9324	97.774	97.6902	97.9411	97.8576	97.8576	97.6044	97.6845	97.8576	97.6044	97.6064	98.0229	97.8576	97.1835	97.4385	97.671	97.0145	97.2702	97.1015	97.2382	97.017	97.0991	97.5225	97.5225	97.5225
82	P. agarici	97.1835	97.5184	97.2702	97.6883	96.7468	97.5163	97.1835	97.1835	97.1835	97.3522	97.2679	97.2679	97.1835	97.43	97.1812	97.35	97.4364	97.6044	97.2679	97.2679	97.5204	97.2679	97.3522	97.0991	96.6754	96.7603	96.6754	96.5903	96.6754	96.417	96.4964	97.3522	97.2656	97.1835	96.7576	96.6754	97.35	97.0991	98.1747	97.5184	97.7721	97.6044	97.5764	97.5204	97.6024	97.6044	97.6044	97.8558
83	P. asplenii	97.2656	97.6005	97.3522	97.7703	96.8293	97.6826	97.2656	97.2656	97.4342	97.6024	97.5184	97.35	97.4342	97.5163	97.1789	97.5163	97.6024	97.7703	97.35	97.35	97.5184	97.1812	97.4342	97.35	96.9273	96.8425	96.7576	96.6726	96.9273	96.5846	96.408	97.6864	97.4321	97.4342	96.9248	96.9273	97.2634	97.0121	98.0922	97.6005	97.6864	97.5184	97.4893	97.4342	97.5163	97.7703	97.7703	98.1882
84	P. fuscovaginae	97.1835	97.35	97.2702	97.6883	96.7468	97.6005	97.1835	97.1835	97.3522	97.5204	97.4364	97.2679	97.3522	97.43	97.1812	97.4342	97.5204	97.6883	97.2679	97.2679	97.4364	97.0991	97.3522	97.2679	96.8451	96.8451	96.6754	96.5903	96.8451	96.5023	96.3255	97.6044	97.35	97.3522	96.8425	96.8451	97.1812	96.9299	98.0065	97.35	97.6044	97.4364	97.4063	97.3522	97.4342	97.6883	97.6883	98.1064
85	P. abietaeniphila	97.1859	97.7721	97.2724	97.6902	96.7495	97.5184	97.1859	97.1859	97.4385	97.5225	97.4385	97.2702	97.3544	97.4321	97.0991	97.4364	97.5225	97.6064	97.2702	97.2702	97.4385	97.1859	97.4385	97.2702	96.8478	96.763	96.6781	96.5932	96.763	96.5052	96.3285	97.3544	97.2679	97.3544	96.8451	96.763	97.7721	97.5225	97.924	97.7721	98.1912	98.0246	98.0015	97.9411	98.0229	97.774	97.774	97.8576
86	P. bohemica	97.2702	97.0145	97.3566	97.774	96.9197	97.6864	96.9324	97.2702	97.4385	97.2702	97.1859	97.3544	97.4385	97.1789	97.1835	97.1835	97.2702	97.3544	97.017	97.3544	97.5225	97.2702	97.5225	97.017	96.763	96.8478	96.9324	96.8478	96.6781	96.42	96.243	97.1015	97.1835	97.2702	96.7603	96.6781	96.8451	96.763	97.5019	97.0145	97.2702	97.1015	97.2382	97.017	97.0991	97.4385	97.4385	97.4385
87	P. graminis	97.6902	97.2679	97.6921	97.8576	97.5965	97.9377	97.3544	97.6902	97.5225	97.5225	97.1859	97.6902	97.6902	97.5163	97.6883	97.5204	97.6902	97.774	97.2702	97.6902	97.8576	97.6902	97.9411	97.2702	97.2702	97.1859	97.5225	97.4385	97.3544	97.0991	96.8399	97.9411	97.7721	97.774	97.3522	97.1859	97.2679	97.6902	97.7554	97.2679	97.6902	97.5225	97.6632	97.4385	97.5204	98.1079	98.1079	97.774
88	P. lutea	97.774	97.0991	97.7758	97.6902	97.7647	98.0213	97.4385	97.774	97.3544	97.6064	97.017	97.774	97.774	97.6005	97.8558	97.5204	97.774	97.8576	97.3544	97.774	97.9411	97.774	98.0246	97.5225	97.4385	97.3544	97.6902	97.6064	97.5225	97.2679	97.0096	98.1079	97.9394	97.9411	97.5204	97.3544	97.0991	97.8576	97.5865	97.0991	97.5225	97.3544	97.4935	97.2702	97.3522	98.1912	98.1912	97.8576
89	P. caspiana	98.6073	98.6061	98.6899	98.6899	97.8505	98.7705	98.6899	98.6073	98.5245	98.6899	98.3588	98.6073	98.5245	98.7695	98.1912	98.6888	98.8549	98.9373	98.6073	98.6073	98.7725	98.6899	98.8549	98.4417	97.7758	97.6921	97.7758	97.6921	97.8593	97.6064	97.5184	98.4417	98.3574	98.3588	97.9411	97.7758	98.4404	98.1927	98.9286	98.6061	98.8549	98.6899	98.6747	98.6073	98.6888	99.3478	99.3478	99.4297
90	P. cichorii	97.5204	96.9273	97.6883	97.3522	97.3412	97.8523	97.1835	97.5204	97.2679	97.5204	96.8451	97.6044	97.6883	97.7703	96.8425	97.6024	97.5204	97.6883	97.4364	97.6044	97.8558	97.4364	97.6883	97.2679	97.0991	97.0145	97.2679	97.1835	97.0145	96.7576	96.5818	97.3522	97.0967	97.0991	97.0967	97.0991	96.9273	96.6754	97.2497	96.9273	97.0145	96.8451	96.808	96.7603	96.8425	97.8558	97.8558	97.9394
91	P. asturiensis	97.6921	97.8576	97.8593	98.1095	97.2611	97.9394	97.6084	97.6921	98.0262	97.8593	97.7758	97.7758	97.8593	97.854	97.6902	97.8576	97.9428	98.0262	97.6084	97.7758	97.9428	97.6921	97.8593	97.6084	97.1882	97.2724	97.1882	97.1039	97.2724	96.9324	96.7576	97.7758	97.6902	97.6921	97.1859	97.1882	97.8576	97.6084	98.6791	97.8576	98.2758	98.1095	98.0875	98.0262	98.1079	98.3588	98.3588	98.4417
92	P. viridiflava	97.6084	96.9324	97.8593	97.7758	97.1765	97.6044	97.2724	97.6084	97.7758	97.6921	97.2724	97.7758	97.8593	97.1812	97.017	97.5225	97.6921	97.4406	97.2724	97.7758	97.6084	97.2724	97.5245	97.4406	96.596	96.6809	97.1039	97.0195	96.8504	96.5932	96.417	97.4406	97.3544	97.4406	96.9324	96.8504	97.2702	97.2724	97.5885	96.9324	97.6921	97.5245	97.3256	97.4406	97.5225	97.6921	97.6921	97.5245
93	P. floridensis	97.3566	96.8478	97.6921	97.3566	97.0071	97.7721	97.0195	97.3566	97.3566	97.5245	96.8504	97.6084	97.6921	97.854	97.017	97.774	97.5245	97.6084	97.6084	97.6084	97.7758	97.3566	97.6084	97.2724	96.7657	96.8504	96.935	96.8504	96.6809	96.4229	96.2461	97.1039	97.017	97.1039	96.763	96.6809	96.8478	96.935	97.5039	96.8478	97.2724	97.1039	97.2405	97.0195	97.1015	97.8593	97.8593	97.6921
94	P. cannabina	98.5245	98.1912	98.5245	98.2758	97.8505	98.605	98.6073	98.5245	98.1095	98.6899	98.1095	98.4417	98.5245	98.5209	98.4404	98.5233	98.7725	98.8549	98.3588	98.4417	98.5245	98.4417	98.6073	98.4417	97.9428	98.0262	97.7758	97.6921	97.8593	97.6902	97.5184	98.5245	98.4404	98.3588	97.8576	97.9428	98.1912	98.3588	98.6791	98.1912	98.6073	98.4417	98.5074	98.3588	98.4404	99.5114	99.5114	99.1018
95	P. avellanae	97.9428	97.2702	97.9428	97.6921	97.2611	97.6883	98.0262	97.9428	97.6921	98.1095	97.5245	97.8593	97.9428	97.6864	97.5225	97.9411	98.1927	97.9428	97.7758	97.8593	97.6921	97.6921	97.8593	97.8593	97.0195	97.1039	97.1882	97.1039	97.3566	97.1015	96.9273	97.9428	97.8576	97.9428	97.4385	97.3566	97.6064	97.7758	97.7573	97.2702	98.0262	97.8593	97.7498	97.7758	97.8576	98.6073	98.6073	98.1927
96	P. coronafaciens	98.0262	97.5225	98.1095	98.1095	97.1765	97.8558	98.1095	98.0262	97.8593	98.2758	97.9428	98.0262	98.1095	97.9377	97.5225	98.1912	98.3588	98.1095	98.0262	98.0262	97.8593	97.7758	97.9428	98.0262	97.0195	97.1039	97.1882	97.1039	97.3566	97.1015	96.9273	97.7758	97.8576	97.9428	97.4385	97.3566	97.8576	97.6084	98.0098	97.5225	98.2758	98.1095	97.9188	98.0262	98.1079	98.1927	98.1927	98.2758
97	P. congelans	98.3588	98.1912	98.6899	98.2758	97.6826	98.7705	98.4417	98.3588	98.2758	98.8549	98.1095	98.6073	98.6899	98.7695	98.1079	98.6888	98.9373	99.0196	98.5245	98.6073	98.7725	98.4417	98.6073	98.6073	97.7758	97.6921	97.6084	97.5245	97.7758	97.5225	97.35	98.3588	98.2744	98.3588	97.8576	97.7758	98.1912	98.1927	98.6791	98.1912	98.6073	98.4417	98.4236	98.3588	98.4404	99.1839	99.1839	99.0196
98	P. syringae subsp. syringae	98.2758	98.1079	98.6073	98.1927	97.5985	98.6878	98.3588	98.2758	98.1927	98.7725	98.0262	98.5245	98.6073	98.6867	98.0246	98.6061	98.8549	98.9373	98.4417	98.5245	98.6899	98.3588	98.5245	98.5245	97.6921	97.6084	97.5245	97.4406	97.6921	97.4385	97.2656	98.2758	98.1912	98.2758	97.774	97.6921	98.1079	98.1095	98.5958	98.1079	98.5245	98.3588	98.3397	98.2758	98.3574	99.1018	99.1018	98.9373
99	P. cerasi	98.4417	98.2744	98.7725	98.3588	97.7666	98.8531	98.5245	98.4417	98.3588	98.9373	98.1927	98.6899	98.7725	98.8521	98.1912	98.7715	99.0196	99.1018	98.6073	98.6899	98.8549	98.5245	98.6899	98.6899	97.8593	97.7758	97.6921	97.6084	97.8593	97.6064	97.4342	98.4417	98.3574	98.4417	97.9411	97.8593	98.2744	98.2758	98.7623	98.2744	98.6899	98.5245	98.5074	98.4417	98.5233	99.2659	99.2659	99.1018
100	P. caricapapayae	98.4417	98.1912	98.6073	98.2758	97.7666	98.6878	98.5245	98.4417	98.2758	98.7725	98.1095	98.5245	98.6073	98.6867	98.1912	98.6061	98.8549	98.9373	98.4417	98.5245	98.6899	98.5245	98.6899	98.5245	97.8593	97.7758	97.6921	97.6084	97.8593	97.6064	97.4342	98.4417	98.3574	98.4417	97.9411	97.8593	98.0246	98.1095	98.5123	98.1912	98.4417	98.2758	98.2557	98.1927	98.2744	99.2659	99.2659	99.0196
101	P. amygdali	97.8593	97.3544	97.9428	97.9428	97.0071	97.6883	97.9428	98.0262	97.6921	98.1095	97.7758	97.8593	97.9428	97.7703	97.3544	98.0246	98.1927	97.9428	97.8593	97.8593	97.6921	97.6084	97.7758	97.8593	96.8504	96.935	97.0195	96.935	97.1882	96.9324	96.7576	97.6084	97.6902	97.7758	97.2702	97.1882	97.6902	97.4406	97.8416	97.3544	98.1095	97.9428	97.7498	97.8593	97.9411	98.0262	98.0262	98.1095
102	P. tremae	98.6073	98.4404	98.9373	98.5245	97.9343	99.018	98.6899	98.6073	98.3588	99.1018	98.3588	98.8549	98.9373	98.9347	98.3574	98.9364	99.1839	99.2659	98.7725	98.8549	98.9373	98.5245	98.6899	98.8549	98.0262	97.9428	97.8593	97.7758	97.9428	97.774	97.6024	98.6073	98.5233	98.4417	97.9411	98.0262	98.2744	98.2758	98.7623	98.4404	98.6899	98.5245	98.5074	98.4417	98.5233	99.4297	99.4297	99.2659
103	P. ficuserectae	98.434	98.4327	98.7664	98.3507	97.7554	98.8474	98.5172	98.434	98.3507	98.9321	98.1837	98.6835	98.7664	98.8483	98.1822	98.7654	99.0148	99.0974	98.6004	98.6835	98.8493	98.5172	98.6835	98.6835	97.8487	97.7647	97.6807	97.5965	97.8487	97.5945	97.4214	98.434	98.3493	98.434	97.9309	97.8487	98.2658	98.2672	98.7582	98.4327	98.6835	98.5172	98.4999	98.434	98.516	99.2623	99.2623	99.0974
104	P. meliae	98.605	98.6038	98.9356	98.5221	97.9309	99.0164	98.6878	98.605	98.3561	99.1003	98.3561	98.8531	98.9356	98.9347	98.3547	98.9347	99.1826	99.2647	98.7705	98.8531	98.9356	98.5221	98.6878	98.8531	98.0229	97.9394	97.8558	97.7721	97.9394	97.7703	97.5985	98.605	98.5209	98.4392	97.9377	98.0229	98.2715	98.273	98.7623	98.6038	98.6878	98.5221	98.5049	98.4392	98.5209	99.4287	99.4287	99.2647
105	P. syringae subsp. savastanoi	98.4392	98.2715	98.7705	98.3561	97.7629	98.8512	98.3561	98.4392	98.1897	98.7705	98.0229	98.6878	98.7705	98.6038	98.0213	98.6038	98.8531	98.9356	98.4392	98.6878	98.7705	98.3561	98.5221	98.5221	97.6883	97.6044	97.6883	97.6044	97.6044	97.4342	97.2611	98.273	98.1882	98.1064	97.6024	97.6883	97.9377	97.9394	98.4288	98.2715	98.3561	98.1897	98.1686	98.1064	98.1882	99.1003	99.1003	98.9356
106	P. turukhanskensis	96.1669	95.9924	95.9991	96.1669	97.2588	96.3316	96.2523	96.1669	95.7382	96.0814	95.7382	95.9957	95.91	96.243	96.5903	96.2492	96.2523	96.4229	96.1669	95.9957	96.1669	96.4229	96.4229	95.9957	97.1859	97.1015	97.1859	97.1015	97.2702	97.0145	97.0943	97.1015	96.8451	96.8478	97.4364	97.2702	96.2492	96.6781	96.3929	95.9924	96.2523	96.1669	96.2945	95.9957	96.1637	96.5932	96.5932	96.6781
107	P. coleopterorum	97.2702	97.4364	97.2724	97.3544	97.0894	97.5184	97.2702	97.2702	97.1015	97.5225	97.1015	97.2702	97.3544	97.3478	97.6044	97.3522	97.5225	97.6064	97.1859	97.2702	97.4385	97.2702	97.5225	97.2702	97.1859	97.2702	97.017	96.9324	97.1015	96.8451	96.6698	97.6902	97.6044	97.6902	97.1835	97.1015	97.2679	97.6902	97.4171	97.4364	97.6902	97.5225	97.8326	97.6064	97.5204	97.9411	97.9411	97.6064
108	P. rhizosphaerae	97.1835	97.4342	97.1859	97.3522	97.087	97.4321	97.1835	97.3522	97.0991	97.4364	97.0991	97.1835	97.2679	97.2611	97.4342	97.2656	97.4364	97.5204	97.0991	97.1835	97.3522	97.1835	97.4364	97.1835	97.1835	97.0991	97.0145	96.9299	97.0991	96.8425	96.667	97.6883	97.6024	97.6883	97.1812	97.0991	97.4342	97.8558	97.5845	97.4342	97.8558	97.6883	97.8308	97.6044	97.6864	97.8558	97.8558	97.5204
109	P. japonica	96.5081	95.9924	96.511	96.6781	96.408	96.8425	96.1669	96.5081	96.4229	96.4229	96.0814	96.5081	96.5932	96.243	96.5903	96.2492	96.4229	96.5932	96.0814	96.5081	96.6781	96.5081	96.763	96.1669	96.1669	96.0814	96.3377	96.2523	96.0814	95.8206	95.6412	96.9324	96.6754	96.763	96.2492	96.1669	95.9924	96.4229	96.6503	95.9924	96.4229	96.2523	96.3808	96.1669	96.2492	96.763	96.763	96.763
110	P. qingdaonensis	97.3544	97.0145	97.3566	97.5225	97.2588	97.6024	97.017	97.3544	97.2702	97.4385	96.9324	97.3544	97.4385	97.0943	97.2679	97.0991	97.2702	97.4385	96.9324	97.3544	97.5225	97.3544	97.6064	97.017	97.017	96.9324	97.1859	97.1015	96.9324	96.6754	96.4994	97.774	97.5204	97.6064	97.0991	97.017	96.8451	97.2702	97.4171	97.0145	97.2702	97.1015	97.2382	97.017	97.0991	97.6064	97.6064	97.6064
111	P. laurentiana	97.6064	97.0991	97.6084	97.774	97.5122	97.854	97.2702	97.6064	97.3544	97.5225	97.1859	97.6064	97.6902	97.2634	97.5204	97.3522	97.5225	97.6902	97.1859	97.6064	97.6902	97.4385	97.6902	97.2702	97.2702	97.1859	97.4385	97.3544	97.1015	96.9299	96.7549	98.0246	97.7721	97.6902	97.1835	97.2702	97.0991	97.5225	97.671	97.0991	97.3544	97.3544	97.4935	97.1015	97.3522	97.8576	97.8576	97.8576
112	P. donghuensis	97.1015	96.5903	97.2724	97.2702	96.7495	97.6024	96.763	97.1015	97.017	97.1859	96.6781	97.2702	97.3544	97.0943	96.42	97.0145	97.1859	97.3544	96.9324	97.2702	97.4385	97.1015	97.3544	96.9324	96.5081	96.4229	96.6781	96.5932	96.4229	96.1637	95.9857	96.9324	96.6754	96.763	96.5903	96.5081	96.7603	96.2523	97.0773	96.5903	96.8478	96.6781	96.639	96.5932	96.6754	97.2702	97.2702	97.6064
113	P. wadenswillerensis	96.9324	96.42	97.1039	97.1015	96.5789	97.4342	96.5932	96.9324	96.8478	97.017	96.5081	97.1015	97.1859	96.9248	96.2492	96.8451	97.017	97.1859	96.763	97.1015	97.2702	96.9324	97.1859	96.763	96.3377	96.2523	96.5081	96.4229	96.2523	95.9924	95.8136	96.763	96.5052	96.5932	96.42	96.3377	96.5903	96.0814	96.9068	96.42	96.6781	96.5081	96.467	96.4229	96.5052	97.1015	97.1015	97.4385
114	P. uticensis	97.0943	96.667	97.2656	97.2634	96.8267	97.5965	96.7549	97.0943	97.0096	97.1789	96.6698	97.2634	97.3478	97.087	96.4964	97.0071	97.1789	97.2634	96.9248	97.2634	97.4321	97.0943	97.3478	97.0096	96.5846	96.4994	96.7549	96.6698	96.4994	96.2398	96.0616	96.7549	96.667	96.7549	96.5818	96.4994	96.8373	96.414	97.1553	96.667	96.9248	96.7549	96.7166	96.6698	96.7522	97.3478	97.3478	97.3478
115	P. vranovensis	96.6781	96.6754	96.7657	97.1859	96.2367	97.0967	96.5081	96.6781	96.9324	96.8478	96.763	96.763	96.8478	96.7549	96.42	96.7603	96.8478	97.017	96.5932	96.763	96.9324	96.6781	96.9324	96.5932	96.1669	96.0814	96.1669	96.0814	96.0814	95.8206	95.6412	96.9324	96.6754	96.763	96.2492	96.1669	96.5052	96.2523	97.2474	96.6754	96.9324	96.763	96.7249	96.6781	96.7603	97.017	97.017	97.4385
116	P. alkylphenolica	97.017	96.8451	97.1039	97.5225	96.5789	97.4342	96.6781	97.017	97.2702	97.017	96.9324	97.1015	97.1859	96.9248	96.5903	96.9299	97.017	97.1859	96.763	97.1015	97.2702	97.017	97.2702	96.763	96.3377	96.2523	96.5081	96.4229	96.2523	95.9924	95.8136	97.1015	96.8451	96.9324	96.42	96.3377	96.6754	96.4229	97.3323	96.8451	97.1015	96.9324	96.8964	96.8478	96.9299	97.1859	97.1859	97.6064
117	P. reidholzensis	97.1859	96.1637	97.0195	97.017	97.0894	97.0121	96.9324	97.1859	96.763	96.9324	96.4229	97.017	97.1015	96.4994	96.6754	96.7603	97.017	96.763	96.6781	97.017	97.017	96.9324	97.1015	96.8478	96.5081	96.4229	97.017	96.9324	96.8478	96.5903	96.414	97.2702	97.1835	97.2702	96.9299	96.8478	96.5052	96.9324	96.6503	96.1637	96.9324	96.5932	96.553	96.5081	96.5903	97.1015	97.1015	96.763
118	P. cremoricolorata	97.1015	96.5903	97.3566	97.2702	96.8346	97.6864	96.6781	97.1015	97.017	97.2702	96.6781	97.3544	97.4385	97.1789	96.7603	97.1835	97.1859	97.2702	97.017	97.3544	97.3544	97.017	97.3544	97.1859	96.763	96.6781	96.763	96.6781	96.4229	96.1637	95.9857	97.017	96.9299	97.017	96.5052	96.4229	96.42	96.6781	97.0773	96.5903	96.8478	96.6781	96.8107	96.5932	96.6754	97.3544	97.3544	97.1859
119	P. fulva	96.1509	95.6302	95.9823	96.1509	97.2474	96.3162	95.8928	96.1509	95.8928	95.8928	95.5474	95.9789	96.0649	95.9688	96.3193	95.9756	95.9789	96.0649	95.8066	95.9789	96.3224	96.3224	96.408	95.8066	97.0046	96.9197	97.1742	97.0894	97.0046	96.7468	96.5704	96.5789	96.4906	96.5789	97.087	97.0046	95.8031	96.2367	96.1184	95.6302	95.8928	95.7203	95.844	95.6339	95.7167	96.408	96.408	96.0649
120	P. parafulva	96.763	96.2492	96.596	96.763	97.8487	96.9273	96.5081	96.763	96.5081	96.5081	96.1669	96.5932	96.6781	96.5846	96.9299	96.5903	96.5932	96.6781	96.4229	96.5932	96.9324	96.8478	97.017	96.4229	97.6064	97.5225	97.774	97.6902	97.6064	97.3522	97.1789	97.1859	97.0991	97.1859	97.6883	97.6064	96.42	96.8478	96.7359	96.2492	96.5081	96.3377	96.467	96.2523	96.3346	97.017	97.017	96.6781
121	P. guariconensis	96.596	96.1669	96.5988	96.8504	96.667	97.0145	96.3407	96.596	96.511	96.511	96.1701	96.596	96.6809	96.417	96.763	96.4229	96.596	96.7657	96.3407	96.596	96.7657	96.8504	97.0195	96.4259	96.4259	96.3407	96.596	96.511	96.4259	96.1669	95.989	97.2724	97.017	97.1039	96.5932	96.511	95.9957	96.596	96.6531	96.1669	96.4259	96.2555	96.3838	96.1701	96.2523	96.935	96.935	96.935
122	P. mosselii	96.9324	96.5052	96.935	97.1015	97.0046	97.2656	96.6781	96.9324	96.8478	96.8478	96.5081	96.9324	97.017	96.7549	97.0991	96.7603	96.9324	97.1015	96.5932	96.9324	97.1015	97.017	97.1859	96.763	96.763	96.6781	96.9324	96.8478	96.763	96.5052	96.3285	97.6064	97.3522	97.4385	96.9299	96.8478	96.3346	96.9324	97.0773	96.5052	96.763	96.5932	96.7249	96.5081	96.5903	97.2702	97.2702	97.2702
123	P. soli	96.5932	96.0781	96.511	96.6781	97.2588	96.8425	96.3377	96.5932	96.4229	96.4229	96.0814	96.5081	96.5932	96.4994	96.5052	96.5052	96.5081	96.6781	96.3377	96.5081	96.6781	96.6781	96.8478	96.1669	97.017	96.9324	97.1859	97.1015	97.017	96.7603	96.5846	97.017	96.7603	96.8478	97.1835	97.1015	96.2492	96.3377	96.6503	96.0781	96.3377	96.1669	96.2945	96.0814	96.1637	96.8478	96.8478	96.8478
124	P. entomophila	97.1765	96.5789	97.0096	97.1765	97.0797	97.3412	96.9222	97.0071	96.9222	96.9222	96.5818	97.1765	97.2611	96.9996	97.3434	96.8346	97.0071	97.1765	96.8373	97.1765	97.3456	97.0919	97.2611	96.8373	96.8373	96.7522	97.0071	97.0919	97.0071	96.7495	96.5732	97.8505	97.5965	97.6826	97.1742	97.0919	96.408	97.0071	97.0675	96.5789	96.8373	96.667	96.8	96.5818	96.6643	97.3456	97.3456	97.3456
125	P. taiwanensis	97.1015	96.6754	97.1039	97.2702	97.1742	97.4342	96.8478	97.1015	97.017	97.017	96.6781	97.1015	97.1859	96.9248	97.2679	96.9299	97.1015	97.2702	96.763	97.1015	97.4385	97.1859	97.3544	96.9324	96.9324	96.8478	97.1015	97.017	96.9324	96.6754	96.4994	97.774	97.5204	97.6064	97.0991	97.017	96.5052	97.1015	97.1624	96.6754	96.9324	96.763	96.8964	96.6781	96.7603	97.4385	97.4385	97.4385
126	P. hunanensis	97.2702	96.9299	97.2724	97.4385	97.1742	97.6024	97.017	97.2702	97.1859	97.1859	96.8478	97.2702	97.3544	97.0943	97.2679	97.0991	97.2702	97.3544	96.9324	97.2702	97.6064	97.3544	97.5225	96.9324	96.9324	96.8478	97.1015	97.017	96.9324	96.6754	96.4994	97.5225	97.4364	97.5225	97.0145	96.9324	96.7603	97.1859	97.4171	96.9299	97.1859	97.017	97.1529	96.9324	97.0145	97.6902	97.6902	97.3544
127	P. plecoglossida	97.2702	96.6754	97.1039	97.2702	97.0046	97.4342	97.017	97.1015	97.017	97.017	96.6781	97.2702	97.3544	97.0943	97.2679	96.9299	97.1015	97.2702	96.9324	97.2702	97.6064	97.1859	97.3544	96.763	96.763	96.6781	96.9324	97.017	96.9324	96.6754	96.4994	97.774	97.5204	97.6064	97.0991	97.017	96.5052	96.9324	97.1624	96.6754	96.9324	96.763	96.8964	96.6781	96.7603	97.4385	97.4385	97.4385
128	P. putida	96.9324	96.9299	97.0195	97.4385	96.6643	97.35	96.8478	96.9324	97.017	96.9324	97.017	97.017	97.1015	96.8399	96.5903	96.9299	97.017	97.1015	96.763	97.017	97.2702	96.8478	97.017	96.6781	96.2523	96.1669	96.4229	96.3377	96.1669	96.0781	95.9857	96.8478	96.7603	96.6781	96.1637	96.2523	96.7603	96.5081	97.4171	96.9299	97.1859	97.017	96.982	96.9324	97.0145	97.2702	97.2702	97.3544
129	P. monteilii	97.2702	96.6754	97.1039	97.2702	97.1742	97.4342	97.017	97.1015	96.8478	97.017	96.6781	97.2702	97.3544	97.0096	97.4364	96.9299	97.1015	97.2702	96.9324	97.2702	97.5225	97.017	97.1859	96.9324	96.9324	96.8478	97.1015	97.1859	97.017	96.8451	96.6698	97.9411	97.6883	97.6064	97.0991	97.1859	96.5052	97.1015	97.1624	96.6754	96.9324	96.763	96.8964	96.6781	96.7603	97.4385	97.4385	97.4385
130	P. asiatica	97.1015	96.6754	97.1039	97.2702	97.1742	97.4342	96.8478	97.1015	97.017	97.017	96.6781	97.1015	97.1859	96.9248	97.2679	96.9299	97.1015	97.2702	96.763	97.1015	97.4385	97.1859	97.3544	96.9324	96.9324	96.8478	97.1015	97.017	96.9324	96.6754	96.4994	97.774	97.5204	97.6064	97.0991	97.017	96.5052	97.1015	97.1624	96.6754	96.9324	96.763	96.8964	96.6781	96.7603	97.4385	97.4385	97.4385
131	P. pyomelaminifaciens	97.1015	96.6754	97.1039	97.2702	97.1742	97.4342	96.8478	97.1015	97.017	97.017	96.6781	97.1015	97.1859	96.9248	97.2679	96.9299	97.1015	97.2702	96.763	97.1015	97.4385	97.1859	97.3544	96.9324	96.9324	96.8478	97.1015	97.017	96.9324	96.6754	96.4994	97.774	97.5204	97.6064	97.0991	97.017	96.5052	97.1015	97.1624	96.6754	96.9324	96.763	96.8964	96.6781	96.7603	97.4385	97.4385	97.4385
132	P. massiliensis	97.1859	96.7603	97.1039	96.9324	96.8346	97.4342	97.2702	97.1859	96.6781	97.3544	96.6781	97.1015	97.1859	97.6005	96.7603	97.5204	97.4385	97.5225	97.4385	97.1015	97.4385	97.2702	97.4385	97.1015	96.9324	96.8478	96.763	96.6781	96.9324	96.6754	96.4994	97.017	96.9299	97.017	97.0145	96.9324	96.8451	96.763	97.3323	96.7603	97.017	96.9324	96.8964	96.763	96.9299	97.6902	97.6902	97.4385
133	P. mangrovi	95.2205	94.9561	95.2245	95.3935	95.0263	95.5586	95.307	95.2205	95.1339	95.4798	95.1339	95.2205	95.307	95.3819	95.5623	95.3896	95.566	95.6522	95.2205	95.2205	95.566	95.307	95.4798	95.2205	95.2205	95.1339	95.0472	94.9603	95.2205	94.9561	94.8604	95.3935	95.7346	95.8241	95.3031	95.2205	95.1298	95.566	95.789	94.9561	95.2205	95.3935	95.5135	95.307	95.3896	95.566	95.566	95.307
134	P. sichuanensis	97.1015	96.6754	97.1039	97.2702	97.1742	97.4342	96.8478	97.1015	97.017	97.017	96.6781	97.1015	97.1859	96.9248	97.2679	96.9299	97.1015	97.2702	96.763	97.1015	97.2702	97.1859	97.3544	96.9324	96.9324	96.8478	97.1015	97.017	96.9324	96.6754	96.4994	97.774	97.5204	97.6064	97.0991	97.017	96.5052	97.1015	97.1624	96.6754	96.9324	96.763	96.8964	96.6781	96.7603	97.4385	97.4385	97.4385
135	P. argentinensis	95.9066	95.5586	95.566	95.7346	96.832	95.8997	95.6485	95.7346	95.2165	95.3031	94.9561	95.7346	95.6485	95.6376	95.989	95.4722	95.476	95.5623	95.5623	95.7346	96.0781	95.9066	95.9066	95.2165	96.42	96.3346	96.7603	96.8451	96.7603	96.417	96.4964	96.2492	96.1605	96.0781	96.6726	96.5903	95.8171	96.2492	96.1314	95.5586	95.8206	95.7346	95.8581	95.5623	95.7311	95.9066	95.9066	95.5623
136	P. straminea	95.4722	95.4684	95.3031	95.6449	96.6587	95.6376	95.2125	95.4722	95.1257	95.0388	94.9518	95.2992	95.2125	95.2873	95.5549	95.2952	95.2125	95.2992	95.2125	95.2992	95.6449	95.6449	95.6449	94.9518	96.1605	96.0748	96.5023	96.417	96.3316	95.9857	96.1509	95.8171	95.7275	95.6449	96.243	96.1605	95.7275	95.989	96.0417	95.4684	95.7311	95.6449	95.7676	95.4722	95.6412	95.6449	95.6449	95.4722
137	P. punonensis	95.7382	95.9066	95.5697	95.7382	96.8346	95.9031	95.8241	95.7382	95.307	95.6522	95.307	95.566	95.4798	95.8136	96.1637	95.8206	95.8241	95.91	95.7382	95.566	95.91	95.9957	95.9957	95.566	96.763	96.6781	96.763	96.6781	96.8478	96.5903	96.6698	96.4229	96.3346	96.3377	96.9299	96.763	96.1637	96.5932	96.4788	95.9066	96.1669	96.0814	96.2081	95.91	96.0781	96.2523	96.2523	95.91
138	P. flavescens	96.0814	95.9066	95.9134	96.0814	95.8066	96.2461	95.8241	95.91	95.6522	95.6522	95.307	96.0814	95.9957	95.8136	95.9924	95.6485	95.8241	95.91	95.7382	96.0814	96.4229	96.1669	96.1669	95.3935	95.3935	95.307	95.7382	95.8241	95.6522	95.3896	95.4684	96.2523	96.1637	96.1669	95.7346	95.566	95.8206	96.2523	96.4788	95.9066	96.1669	96.0814	96.2081	95.91	96.0781	96.2523	96.2523	95.91
139	P. seleniipraecipitatans	96.3377	96.5052	96.1701	96.3377	96.408	96.5023	96.4229	96.1669	95.7382	96.2523	95.91	96.3377	96.2523	96.3285	96.9299	96.2492	96.4229	96.5081	96.3377	96.3377	96.5932	96.2523	96.2523	96.1669	96.3377	96.2523	96.3377	96.4229	96.5081	96.3346	96.414	97.1859	97.0991	96.9324	96.5052	96.5081	96.42	97.1859	97.0773	96.5052	96.763	96.6781	96.8107	96.5081	96.6754	96.8478	96.8478	96.5081
140	P. anguilliseptica	95.1339	95.1298	95.311	95.3935	94.7643	95.6449	94.8734	95.1339	95.1339	95.0472	94.612	95.307	95.2205	95.0346	94.6948	95.043	95.2205	95.3935	94.9603	95.307	95.6522	95.566	95.566	94.7864	94.262	94.1743	94.612	94.5247	94.3497	94.2572	94.5108	95.2205	94.9561	94.9603	94.52	94.3497	94.6948	94.6992	95.4416	95.1298	95.1339	94.9603	94.9003	94.8734	94.9561	95.307	95.307	95.4798
141	P. peli	95.566	95.7346	95.5697	95.7382	95.8928	95.5586	95.6522	95.566	95.307	95.6522	95.307	95.566	95.4798	95.2085	95.476	95.6485	95.8241	95.6522	95.566	95.566	95.4798	95.4798	95.4798	95.566	95.3935	95.307	95.7382	95.6522	95.7382	95.5623	95.7275	96.3377	96.0781	95.91	95.8206	95.8241	96.2492	96.1669	95.6155	95.7346	96.3377	95.9957	95.9484	95.91	95.9924	95.8241	95.8241	95.8241
142	P. guineae	95.307	95.6485	95.311	95.4798	95.6339	95.2992	95.3935	95.307	95.0472	95.566	95.0472	95.307	95.2205	94.9476	95.2165	95.3896	95.566	95.3935	95.307	95.307	95.2205	95.2205	95.2205	95.307	95.1339	95.0472	95.4798	95.3935	95.4798	95.3031	95.4684	95.91	95.8206	95.6522	95.5623	95.566	96.6754	96.5932	95.962	95.6485	96.4229	96.4229	96.3808	96.3377	96.42	95.3935	95.3935	95.3935
143	P. cuatrocienegasensis	95.9957	96.6754	95.9991	96.1669	96.2367	96.3316	96.0814	95.9957	95.91	96.0814	95.7382	95.9957	95.91	96.0715	96.2492	96.0781	96.2523	96.3377	95.9957	95.9957	96.3377	96.4229	96.4229	95.9957	96.1669	96.0814	96.1669	96.0814	96.2523	95.9924	96.0715	96.5081	96.42	96.4229	96.3346	96.1669	96.8451	96.9324	96.7359	96.6754	96.9324	96.763	96.8964	96.6781	96.7603	96.6781	96.6781	96.3377
144	P. marincola	95.7382	95.7346	95.7418	95.91	95.9789	96.0748	95.4798	95.7382	95.4798	95.4798	95.1339	95.7382	95.6522	95.4684	95.9924	95.476	95.6522	95.7382	95.3935	95.7382	96.0814	96.1669	96.1669	95.3935	95.566	95.4798	95.91	95.8241	95.6522	95.3896	95.4684	96.2523	96.1637	96.1669	95.7346	95.566	95.5623	96.3377	96.2209	95.7346	95.9957	95.8241	95.9484	95.7382	95.8206	96.0814	96.0814	95.7382
145	P. segetis	95.6522	95.6485	95.6558	95.8241	95.7203	95.989	95.3935	95.6522	95.3935	95.3935	95.0472	95.6522	95.566	95.3819	95.7346	95.3896	95.566	95.6522	95.307	95.6522	95.9957	96.0814	96.0814	95.307	95.307	95.2205	95.6522	95.566	95.3935	95.1298	95.2085	95.9957	95.9066	95.91	95.476	95.307	95.476	96.0814	96.1347	95.6485	95.91	95.7382	95.8616	95.6522	95.7346	95.9957	95.9957	95.6522
146	P. taeanensis	96.763	96.7603	96.8478	96.8478	97.3434	97.0121	96.5081	96.763	96.5081	96.5081	96.2523	96.763	96.6781	96.5846	96.6754	96.6754	96.6781	96.763	96.5081	96.763	97.017	97.017	96.8478	96.4229	96.9324	96.8478	97.2702	97.1859	96.9324	96.7603	96.8399	96.9324	96.8451	96.6781	96.9299	96.9324	97.0991	97.1859	97.5019	96.7603	97.1859	97.017	97.1529	96.9324	97.0145	97.1015	97.1015	96.763
147	P. benzenivorans	96.6781	96.5052	96.511	96.763	96.5789	96.9273	96.4229	96.5081	96.2523	96.2523	95.91	96.6781	96.5932	96.414	96.7603	96.2492	96.4229	96.5081	96.4229	96.6781	97.017	96.9324	96.763	96.1669	96.1669	96.0814	96.5081	96.5932	96.4229	96.1637	96.243	97.017	96.9299	96.9324	96.5052	96.3377	96.3346	96.9324	96.9921	96.5052	96.763	96.5932	96.7249	96.5081	96.5903	96.8478	96.8478	96.5081
148	P. borbori	96.1669	95.9066	96.1701	96.3377	95.9789	96.5023	95.91	96.1669	95.9957	95.91	95.566	96.1669	96.0814	95.8997	96.0781	95.9066	96.0814	96.2523	95.8241	96.1669	96.5081	96.5932	96.5932	95.6522	95.6522	95.566	95.9957	95.91	95.7382	95.476	95.5549	96.2523	96.3346	96.3377	95.9066	95.7382	95.7346	96.1669	96.4788	95.9066	96.1669	95.9957	96.1216	95.91	95.9924	96.2523	96.2523	96.0814
149	P. glareae	95.7382	95.5623	95.5697	95.7382	95.6339	95.5586	95.8241	95.566	95.2205	95.6522	95.307	95.7382	95.6522	95.3819	95.8206	95.6485	95.8241	95.566	95.7382	95.7382	95.6522	95.4798	95.4798	95.566	95.2205	95.1339	95.566	95.6522	95.7382	95.5623	95.6412	96.4229	96.3346	96.1669	95.7346	95.7382	95.7346	96.3377	96.0484	95.5623	96.1669	95.9957	95.9484	95.91	95.9924	95.91	95.91	95.566
150	P. luteola	95.307	94.9561	95.138	95.307	95.2004	95.4722	95.2205	95.307	94.6992	95.0472	94.8734	95.307	95.2205	95.3819	95.2165	95.2165	95.2205	95.307	95.307	95.307	95.6522	95.307	95.307	94.7864	95.1339	95.0472	95.307	95.3935	95.4798	95.3031	95.2952	95.2205	95.3896	95.307	95.3896	95.307	95.2165	95.1339	95.5286	94.9561	95.4798	95.1339	95.2513	95.0472	95.1298	95.307	95.307	95.0472
151	P. zeshuii	95.0472	94.6948	94.8777	95.0472	94.9391	95.2125	94.9603	95.0472	94.4372	94.7864	94.612	95.0472	94.9603	95.1216	95.043	94.9561	94.9603	95.0472	95.0472	95.0472	95.3935	95.0472	95.0472	94.5247	94.8734	94.8734	95.0472	95.1339	95.2205	95.043	95.0346	94.9603	95.1298	95.0472	95.1298	95.0472	94.9561	94.8734	95.2674	94.6948	95.2205	94.8734	94.9882	94.7864	94.8691	95.0472	95.0472	94.7864
152	P. asuensis	95.043	94.8648	95.0472	95.2165	95.3702	95.3819	94.9561	95.043	94.6948	94.9561	94.782	95.043	94.9561	95.1175	95.2125	95.1257	95.1298	95.2165	95.043	95.043	95.3896	95.3031	95.3031	94.8691	95.3031	95.3031	95.476	95.3896	95.3896	95.2992	95.2913	95.1298	95.2992	95.3031	95.4722	95.3031	95.1257	95.2165	95.4378	94.8648	95.2165	95.043	95.3348	95.1298	95.0388	95.2165	95.2165	94.9561
153	P. duriflava	94.0864	93.9053	94.0914	94.262	94.1496	94.2523	94.1743	94.0864	93.8223	94.262	94.0864	94.0864	94.0864	94.3353	94.3449	94.52	94.5247	94.4372	94.262	94.0864	94.262	94.1743	94.1743	93.9985	94.1743	94.262	94.262	94.1743	94.5247	94.4325	94.2475	94.3497	94.4325	94.4372	94.52	94.3497	94.3449	94.262	94.4781	93.9053	94.4372	94.262	94.3708	93.9985	94.2572	94.4372	94.4372	94.262
154	P. oryzihabitans	94.262	94.1694	94.2669	94.262	93.796	94.6029	94.3497	94.0864	93.8223	94.3497	93.9985	94.4372	94.3497	94.7732	94.1694	94.52	94.5247	94.612	94.6992	94.4372	94.7864	94.3497	94.3497	94.4372	94.262	94.1743	93.9104	93.9985	94.1743	93.9053	94.0714	94.1743	94.3449	94.3497	94.2572	94.0864	94.1694	94.262	94.8299	94.1694	94.262	94.4372	94.4593	94.3497	94.4325	94.5247	94.5247	94.5247
155	P. psychrotolerans	94.262	94.1694	94.2669	94.262	93.796	94.6029	94.3497	94.0864	93.8223	94.3497	93.9985	94.4372	94.3497	94.7732	94.1694	94.52	94.5247	94.612	94.6992	94.4372	94.7864	94.3497	94.3497	94.4372	94.262	94.1743	93.9104	93.9985	94.1743	93.9053	94.0714	94.1743	94.3449	94.3497	94.2572	94.0864	94.1694	94.262	94.8299	94.1694	94.262	94.4372	94.4593	94.3497	94.4325	94.5247	94.5247	94.5247
156	P. chloritidismutans	96.3377	97.0145	96.4259	96.8478	95.8928	96.7576	96.2523	96.3377	96.4229	96.5081	96.4229	96.4229	96.3377	96.414	96.0781	96.42	96.5081	96.5932	96.3377	96.4229	96.4229	96.4229	96.5932	96.2523	95.8241	95.7382	95.8241	95.7382	95.7382	95.476	95.6412	96.3377	96.2492	96.2523	95.8206	95.6522	97.0145	96.763	97.5865	97.0145	97.2702	97.2702	97.2382	97.017	97.2679	96.763	96.763	96.8478
157	P. kunmingensis	96.2523	96.7603	96.3407	96.763	95.8066	96.6726	96.1669	96.2523	96.3377	96.4229	96.3377	96.3377	96.2523	96.3285	95.9924	96.3346	96.4229	96.5081	96.2523	96.3377	96.3377	96.3377	96.5081	96.1669	95.7382	95.6522	95.7382	95.6522	95.6522	95.3896	95.5549	96.0814	96.1637	96.1669	95.7346	95.566	96.7603	96.5081	97.3323	96.7603	97.017	97.017	96.982	96.763	97.0145	96.5081	96.5081	96.5932
158	P. songnenensis	96.3377	96.5903	96.3407	96.5081	96.2367	96.6726	96.2523	96.3377	96.0814	96.4229	96.0814	96.3377	96.2523	96.243	96.42	96.2492	96.4229	96.5932	96.1669	96.3377	96.3377	96.4229	96.5932	96.1669	96.1669	96.0814	96.1669	96.0814	96.0814	95.8206	95.9857	96.9324	96.6754	96.6781	96.2492	96.0814	96.2492	96.6781	96.9068	96.5903	96.6781	96.5081	96.639	96.4229	96.5052	96.763	96.763	96.763
159	P. perfectomarina	95.91	96.1637	95.9134	96.0814	95.9789	96.2461	95.8241	95.91	95.6522	95.9957	95.6522	95.91	95.8241	95.8136	96.1637	95.8206	95.9957	96.1669	95.7382	95.91	95.91	95.9957	96.1669	95.91	95.91	95.8241	95.91	95.8241	95.8241	95.5623	95.7275	96.6781	96.42	96.4229	95.9924	95.8241	95.9066	96.5081	96.5646	96.1637	96.2523	96.1669	96.2945	95.9957	96.1637	96.3377	96.3377	96.3377
160	P. stutzeri	95.6522	95.9066	95.6558	95.8241	95.7203	95.989	95.566	95.6522	95.3935	95.7382	95.3935	95.6522	95.566	95.5549	95.9066	95.5623	95.7382	95.91	95.4798	95.6522	95.6522	95.7382	95.91	95.6522	95.6522	95.566	95.6522	95.566	95.566	95.3031	95.4684	96.4229	96.1637	96.1669	95.7346	95.566	95.5623	96.1669	96.2209	95.9066	95.9957	95.8241	95.9484	95.7382	95.8206	96.0814	96.0814	96.0814
161	P. balearica	95.3935	95.3031	95.4836	95.566	95.2873	95.7311	95.307	95.3935	95.2205	95.4798	95.1339	95.3935	95.307	95.2952	95.6485	95.3031	95.4798	95.566	95.2205	95.3935	95.3935	95.566	95.7382	95.3935	95.3935	95.307	95.3935	95.307	95.307	95.043	95.2085	95.6522	95.8206	95.8241	95.3896	95.2205	94.9561	95.566	95.6155	95.3031	95.3935	95.2205	95.3388	95.1339	95.2165	95.7382	95.7382	95.566
162	P. saudiphocaensis	95.3935	95.5623	95.2245	95.3935	96.4935	95.5586	95.307	95.3935	94.9603	95.4798	94.9603	95.2205	95.1339	95.2952	95.6485	95.3031	95.307	95.3935	95.2205	95.2205	95.2205	95.6522	95.8241	95.2205	96.4229	96.3377	96.4229	96.3377	96.3377	96.0781	96.243	95.91	95.8206	95.8241	96.42	96.2523	95.5623	95.9957	95.789	95.5623	95.6522	95.4798	95.6007	95.3935	95.476	95.7382	95.7382	95.3935
163	P. xanthomarina	96.5081	97.0145	96.596	97.017	96.0649	96.9273	96.4229	96.5081	96.5081	96.6781	96.5932	96.5932	96.5081	96.5846	96.42	96.5903	96.6781	96.763	96.5081	96.5932	96.5932	96.5081	96.6781	96.4229	95.9957	96.0814	95.9957	95.91	95.9957	95.6485	95.8136	96.5081	96.42	96.3377	95.9066	95.8241	96.6754	96.4229	97.3323	97.0145	97.1015	96.9324	96.8964	96.8478	96.9299	96.9324	96.9324	97.017
164	P. zhaodongensis	96.4229	97.0991	96.511	96.9324	95.9789	96.8425	96.3377	96.4229	96.3377	96.5932	96.5081	96.5081	96.4229	96.414	96.1637	96.5052	96.5932	96.6781	96.4229	96.5081	96.4229	96.3377	96.5081	96.3377	95.91	95.8241	95.91	95.8241	95.7382	95.5623	95.7275	96.4229	96.3346	96.1669	95.7346	95.7382	96.8451	96.5932	97.5019	97.0991	97.1859	97.1015	97.0675	96.9324	97.0991	96.8478	96.8478	96.9324
165	P. azotifigens	94.4325	93.7234	94.1743	94.2572	94.0563	94.4231	94.3449	94.2572	93.9934	94.1694	93.817	94.2572	94.3449	94.2426	94.6029	94.0764	94.2572	94.3449	94.0814	94.2572	94.6074	94.3449	94.52	93.9053	94.0814	94.1694	94.0814	94.1694	94.3449	94.1644	93.8898	94.52	94.6029	94.6074	94.2523	94.2572	93.6349	94.0814	94.3851	93.7234	94.0814	93.9053	94.0105	93.817	93.9001	94.6948	94.6948	94.3449
166	P. tarimensis	94.0864	94.1694	94.0914	94.262	94.2377	94.3401	94.1743	94.0864	93.8223	94.0864	93.8223	93.9985	93.9104	94.3353	94.1694	94.3449	94.262	94.3497	94.262	93.9985	94.3497	94.3497	94.3497	93.8223	94.262	94.3497	94.262	94.1743	94.4372	94.0814	94.1595	94.0864	94.1694	94.0864	94.3449	94.262	94.2572	94.3497	95.0052	94.1694	94.612	94.5247	94.5477	94.3497	94.52	94.6992	94.6992	94.5247
167	P. urumqiensis	95.0472	94.6948	95.138	95.2205	94.9391	95.3857	94.9603	95.0472	94.8734	94.9603	94.612	95.0472	94.9603	94.9476	95.3031	94.9561	95.1339	95.2205	94.8734	95.0472	95.3935	95.3935	95.3935	94.8734	94.8734	94.7864	95.0472	94.9603	94.9603	94.8691	94.8604	95.307	95.476	95.4798	95.043	94.8734	94.4325	95.0472	95.1801	94.6948	94.8734	94.6992	94.8123	94.612	94.6948	95.3935	95.3935	95.2205
168	P. matsuisoli	94.5247	93.7287	94.4419	94.5247	94.3257	94.6903	94.4372	94.3497	94.3497	94.4372	94.0864	94.5247	94.612	94.7732	94.4325	94.6074	94.5247	94.612	94.612	94.5247	94.8734	94.5247	94.6992	94.5247	94.612	94.5247	94.4372	94.5247	94.612	94.3449	94.1595	94.262	94.6074	94.6992	94.6948	94.612	93.817	93.9985	94.4781	93.7287	94.1743	94.0864	94.1046	93.9104	94.0814	94.5247	94.5247	94.5247
169	P. kuykendallii	97.017	96.8451	97.0195	97.2702	97.2588	97.35	96.763	97.017	96.8478	97.017	96.5081	97.017	97.017	96.9248	97.4364	96.9299	97.1015	97.1859	96.763	97.017	97.3544	97.1015	97.2702	96.763	96.9324	96.8478	97.1859	97.1015	97.1015	96.8451	96.5846	97.6902	97.5204	97.5225	97.0991	96.9324	97.0145	97.774	97.5019	96.8451	97.2702	97.2702	97.4085	97.017	97.2679	97.5225	97.5225	97.1859
170	P. chengduensis	96.2523	97.0145	96.3407	96.763	95.8066	96.6726	96.3377	96.2523	96.1669	96.4229	96.3377	96.3377	96.2523	96.414	96.1637	96.5052	96.5932	96.763	96.4229	96.3377	96.5932	96.5081	96.5081	96.1669	95.7382	95.6522	95.7382	95.6522	95.7382	95.5623	95.7275	96.6781	96.42	96.2523	95.8206	95.8241	96.6754	96.4229	97.3323	97.0145	97.1015	96.9324	96.8964	96.8478	96.9299	96.763	96.763	97.1859
171	P. sihuiensis	95.9066	95.6449	95.7382	95.7346	96.3193	96.0715	95.6485	95.9066	95.2165	95.476	94.9561	95.7346	95.6485	95.6376	95.6449	95.5586	95.6485	95.8206	95.5623	95.7346	96.0781	96.2492	96.2492	95.3896	95.9066	95.8206	96.2492	96.1637	96.0781	95.7311	95.8963	96.1637	95.9031	95.8206	96.0748	95.9924	95.2992	95.9066	95.9586	95.6449	95.7346	95.5623	95.6841	95.476	95.5586	95.9924	95.9924	95.9924
172	P. toyotomiensis	96.1669	96.9299	96.2555	96.6781	95.7203	96.5875	96.2523	96.1669	96.2523	96.3377	96.2523	96.2523	96.1669	96.414	96.0781	96.42	96.5081	96.6781	96.3377	96.2523	96.5932	96.5932	96.5932	96.0814	95.6522	95.566	95.6522	95.566	95.7382	95.476	95.6412	96.5932	96.3346	96.3377	95.9066	95.7382	96.5903	96.3377	97.2474	96.9299	97.017	96.8478	96.8107	96.763	96.8451	96.6781	96.6781	97.1015
173	P. alcaliphila	96.2523	97.0145	96.3407	96.763	95.8066	96.6726	96.3377	96.2523	96.3377	96.4229	96.3377	96.3377	96.2523	96.4994	96.1637	96.5052	96.5932	96.763	96.4229	96.3377	96.6781	96.6781	96.6781	96.1669	95.7382	95.6522	95.7382	95.6522	95.8241	95.5623	95.7275	96.6781	96.42	96.4229	95.9924	95.8241	96.6754	96.4229	97.3323	97.0145	97.1015	96.9324	96.8964	96.8478	96.9299	96.763	96.763	97.1859
174	P. sedimidis	95.9957	96.42	95.9991	96.1669	96.0649	96.3316	96.0814	95.9957	95.7382	96.0814	95.7382	95.9957	95.91	96.0715	96.42	96.0781	96.2523	96.4229	95.9957	95.9957	96.3377	96.4229	96.4229	95.9957	95.9957	95.91	95.9957	95.91	96.0814	95.8206	95.9857	96.9324	96.6754	96.6781	96.2492	96.0814	96.0781	96.6781	96.7359	96.42	96.5081	96.3377	96.467	96.2523	96.3346	96.5932	96.5932	96.5932
175	P. indoloxydans	96.1669	96.5903	96.1701	96.3377	96.0649	96.5023	96.2523	96.1669	95.7382	96.2523	95.91	96.1669	96.0814	96.1573	96.42	96.2492	96.4229	96.5932	96.1669	96.1669	96.4229	96.4229	96.4229	95.9957	95.9957	95.91	95.9957	95.91	95.9957	95.8206	95.9857	96.9324	96.6754	96.5081	96.0781	96.0814	96.2492	96.6781	96.9068	96.5903	96.6781	96.5081	96.639	96.4229	96.5052	96.763	96.763	96.763
176	P. oleovorans subsp. oleovorans	96.3316	96.7549	96.417	96.5023	96.2304	96.667	96.417	96.3316	95.9031	96.417	96.0748	96.3316	96.2461	96.3224	96.5846	96.414	96.5875	96.7576	96.3316	96.3316	96.5875	96.5875	96.5875	96.1605	96.1605	96.0748	96.1605	96.0748	96.1605	95.9857	96.1509	97.0967	96.8399	96.6726	96.243	96.2461	96.414	96.8425	97.0724	96.7549	96.8425	96.6726	96.8053	96.5875	96.6698	96.9273	96.9273	96.9273
177	P. oleovorans subsp. lubricantis	96.2523	97.0145	96.3407	96.763	95.8066	96.6726	96.3377	96.2523	96.3377	96.4229	96.3377	96.3377	96.2523	96.4994	96.1637	96.5052	96.5932	96.763	96.4229	96.3377	96.6781	96.6781	96.6781	96.1669	95.7382	95.6522	95.7382	95.6522	95.8241	95.5623	95.7275	96.6781	96.42	96.4229	95.9924	95.8241	96.6754	96.4229	97.3323	97.0145	97.1015	96.9324	96.8964	96.8478	96.9299	96.763	96.763	97.1859
178	P. pseudoalcaligenes subsp. pseudoalcaligenes	96.2523	96.6754	96.2555	96.4229	96.1509	96.5875	96.3377	96.2523	95.8241	96.3377	95.9957	96.2523	96.1669	96.243	96.5052	96.3346	96.5081	96.6781	96.2523	96.2523	96.5081	96.5081	96.5081	96.0814	96.0814	95.9957	96.0814	95.9957	96.0814	95.9066	96.0715	97.017	96.7603	96.5932	96.1637	96.1669	96.3346	96.763	96.9921	96.6754	96.763	96.5932	96.7249	96.5081	96.5903	96.8478	96.8478	96.8478
179	P. guguanensis	95.9924	95.2125	95.8241	95.8206	96.3193	96.1573	95.7346	95.9924	95.2165	95.5623	95.043	95.8206	95.7346	95.7239	95.7311	95.6449	95.7346	95.8206	95.6485	95.8206	96.1637	96.3346	96.3346	95.476	95.9924	95.9066	96.3346	96.2492	96.1637	95.8171	95.9823	95.5623	95.9031	95.8206	96.0748	95.9924	94.8648	95.476	95.5248	95.2125	95.3031	95.1298	95.2473	95.043	95.1257	95.6485	95.6485	95.3896
180	P. mendocina	95.7275	95.8101	95.7311	95.8997	95.796	96.0649	95.4684	95.7275	95.3819	95.4684	95.1216	95.7275	95.6412	95.457	95.8101	95.4646	95.6412	95.8136	95.3819	95.7275	96.0715	96.0715	96.0715	95.3819	95.3819	95.2952	95.7275	95.6412	95.5549	95.2044	95.3702	96.3285	96.0682	95.9857	95.5511	95.4684	95.4646	96.0715	96.1249	95.8101	95.8997	95.7275	95.8511	95.6412	95.7239	95.9857	95.9857	95.9857
181	P. fluvialis	95.7382	95.6485	95.7418	95.91	95.7203	96.0748	95.8241	95.7382	95.3935	95.8241	95.4798	95.7382	95.6522	95.8136	96.1637	95.8206	95.9957	96.0814	95.7382	95.7382	96.0814	96.1669	96.1669	95.7382	95.7382	95.6522	95.7382	95.6522	95.8241	95.5623	95.7275	95.9957	96.3346	96.3377	95.9066	95.7382	95.6485	96.2523	96.4788	95.6485	95.7382	95.91	96.0351	95.8241	95.9066	95.91	95.91	95.6522
182	P. pharmacofabricae	95.4798	95.3896	95.4836	95.6522	95.4608	95.8171	95.566	95.4798	95.1339	95.566	95.2205	95.4798	95.3935	95.5549	95.9066	95.5623	95.7382	95.8241	95.4798	95.4798	95.8241	95.91	95.91	95.4798	95.4798	95.3935	95.4798	95.3935	95.566	95.3031	95.4684	95.7382	96.0781	96.0814	95.6485	95.4798	95.3896	95.9957	96.2209	95.3896	95.4798	95.6522	95.7747	95.566	95.6485	95.6522	95.6522	95.3935
183	P. alcaligenes	95.4722	95.8997	95.476	95.6449	95.6266	95.8101	95.5586	95.4722	95.2125	95.5586	95.2125	95.4722	95.3857	95.7203	95.8997	95.5549	95.7311	95.9031	95.4722	95.4722	95.8171	95.7311	95.7311	95.4722	95.4722	95.3857	95.4722	95.3857	95.5586	95.2952	95.3741	96.417	96.1573	96.1605	95.7275	95.5586	95.8136	96.417	96.6447	95.8997	95.9031	96.0748	96.2017	95.989	96.0715	96.0748	96.0748	96.0748
184	P. furukawaii	94.5247	94.52	94.6165	94.6992	94.5892	94.8648	94.4372	94.5247	94.3497	94.612	94.262	94.5247	94.4372	94.4231	94.782	94.4325	94.612	94.7864	94.3497	94.5247	94.5247	94.6992	94.8734	94.5247	94.5247	94.4372	94.5247	94.4372	94.4372	94.1694	94.3353	95.1339	95.043	95.0472	94.6074	94.4372	94.1694	94.7864	94.8299	94.52	94.612	94.4372	94.5477	94.3497	94.4325	94.9603	94.9603	94.9603
185	P. resinovorans	94.8734	95.043	94.7037	94.8734	94.6768	95.0388	94.9603	94.6992	94.4372	94.7864	94.4372	94.8734	94.7864	94.9476	95.1298	94.782	94.9603	95.1339	94.8734	94.8734	95.2205	95.1339	95.1339	94.5247	94.5247	94.4372	94.5247	94.612	94.7864	94.52	94.6858	95.6522	95.3896	95.3935	94.9561	94.7864	94.8691	95.307	95.4416	95.043	95.1339	95.1339	95.2513	94.8734	95.1298	95.307	95.307	95.307
186	P. otitidis	94.782	94.9518	94.612	94.782	94.7599	94.9476	94.8691	94.6074	94.2572	94.6948	94.3449	94.782	94.6948	94.8561	95.2125	94.6903	94.8691	95.043	94.782	94.782	95.1298	94.782	94.782	94.6074	94.6074	94.52	94.6074	94.6948	94.9561	94.6029	94.7688	95.7346	95.4722	95.3896	94.9518	94.8691	94.6029	95.2165	95.2634	94.9518	95.043	94.8691	94.984	94.782	94.8648	95.2165	95.2165	95.2165
187	P. indica	94.5154	93.8065	94.4325	94.5154	94.4922	94.6813	94.2523	94.3401	94.3401	94.1644	93.8118	94.5154	94.5154	94.4137	94.9476	94.2475	94.4278	94.6029	94.1644	94.5154	94.8648	94.4278	94.6029	94.0764	94.0764	94.1644	94.3401	94.4278	94.5154	94.1595	93.8846	95.2992	94.9476	94.8648	94.4231	94.3401	93.6294	94.2523	94.2919	93.8065	94.0764	93.9001	94.0054	93.8118	93.8949	94.9518	94.9518	94.9518
188	P. delhiensis	93.8223	93.3743	93.651	93.8223	93.5297	93.9883	93.9104	93.6457	93.4686	93.9104	93.5572	93.8223	93.9104	93.9832	94.52	93.817	93.9985	94.0864	93.8223	93.8223	94.1743	94.0864	94.0864	93.8223	93.8223	93.9104	93.6457	93.734	93.9985	93.7287	93.6294	94.1743	94.52	94.612	94.0814	93.9985	93.0182	93.6457	93.7695	93.3743	93.4686	93.2911	93.3901	93.2023	93.2854	93.9104	93.9104	93.6457
189	P. humi	94.1743	93.7287	94.0036	94.1743	93.8846	94.3401	94.262	93.9985	93.734	94.1743	93.8223	94.1743	94.1743	94.4231	94.9561	94.2572	94.4372	94.5247	94.1743	94.1743	94.5247	94.4372	94.4372	94.0864	94.0864	94.1743	93.9985	94.0864	94.4372	94.1694	93.9832	94.612	94.8691	94.8734	94.4325	94.262	93.3743	93.9985	94.1247	93.7287	93.8223	93.6457	93.7482	93.5572	93.6403	94.3497	94.3497	94.0864
190	P. citronellolis	94.2572	93.8118	94.0864	94.2572	93.9679	94.4231	94.3449	94.0814	93.817	94.2572	93.9053	94.2572	94.2572	94.5061	95.0388	94.3401	94.52	94.6074	94.2572	94.2572	94.6074	94.52	94.52	94.1694	94.1694	94.2572	94.0814	94.1694	94.52	94.2523	94.0664	94.6948	94.9518	94.9561	94.5154	94.3449	93.4575	94.0814	94.2082	93.8118	93.9053	93.7287	93.8321	93.6403	93.7234	94.4325	94.4325	94.1694
191	P. knackmussii	94.612	93.9934	94.6165	94.7864	94.5015	94.9518	94.3497	94.612	94.262	94.3497	93.9985	94.612	94.5247	94.3353	94.8691	94.3449	94.5247	94.612	94.262	94.612	94.9603	94.8734	94.8734	94.262	94.262	94.3497	94.612	94.5247	94.3497	94.0814	94.0714	94.5247	94.8691	94.8734	94.4325	94.262	93.6403	94.262	94.3899	93.9934	94.0864	93.9104	94.0156	93.8223	93.9053	94.4372	94.4372	94.1743
192	P. panipatensis	94.262	93.817	94.0914	94.262	93.973	94.4278	94.3497	94.0864	93.9104	94.3497	93.9985	94.262	94.3497	94.4231	94.9561	94.2572	94.4372	94.5247	94.262	94.262	94.612	94.3497	94.3497	94.262	94.262	94.3497	94.0864	94.1743	94.4372	94.1694	94.0714	94.612	94.9561	95.0472	94.52	94.4372	93.4631	94.0864	94.1247	93.817	93.9104	93.734	93.8374	93.6457	93.7287	94.3497	94.3497	94.0864
193	P. jinjuensis	94.3497	94.2572	94.5293	94.612	94.5892	94.8648	94.4372	94.3497	94.1743	94.6992	94.262	94.5247	94.5247	94.9476	95.1298	94.9561	94.9603	95.0472	94.6992	94.5247	94.8734	94.612	94.612	94.612	94.7864	94.8734	94.6992	94.612	94.9603	94.6948	94.5108	94.7864	95.043	95.0472	94.9561	94.7864	94.0814	94.612	94.7421	94.2572	94.3497	94.3497	94.4593	94.0864	94.3449	94.6992	94.6992	94.5247
194	P. nitritireducens	95.1339	94.3449	94.9646	95.1339	94.8517	95.2992	94.8734	94.9603	94.612	94.6992	94.3497	95.1339	95.0472	94.8604	95.3896	94.6948	94.8734	94.9603	94.7864	95.1339	95.4798	95.2205	95.2205	94.612	94.612	94.6992	94.9603	95.0472	94.8734	94.6074	94.5983	95.0472	95.3896	95.3935	94.9561	94.7864	93.9934	94.612	94.6542	94.3449	94.4372	94.262	94.3708	94.1743	94.2572	94.7864	94.7864	94.5247
195	P. nitroreducens	95.3624	94.6588	95.1923	95.3624	95.0802	95.5286	95.101	95.1882	94.8387	94.9262	94.5754	95.3624	95.2754	95.2634	95.6192	94.9219	95.101	95.1882	95.0137	95.3624	95.7095	95.4493	95.4493	94.8387	94.8387	94.9262	95.1882	95.2754	95.101	94.8343	94.7377	95.2754	95.6192	95.6229	95.1842	95.0137	94.2181	94.8387	95.0592	94.6588	94.6633	94.4875	94.5992	94.3994	94.4828	95.0137	95.0137	94.751
196	P. multiresinivorans	95.1298	94.3401	94.9603	95.1298	94.8474	95.2952	94.8691	94.9561	94.6074	94.6948	94.3449	95.1298	95.043	94.8561	95.3857	94.6903	94.8691	94.9561	94.782	95.1298	95.476	95.2165	95.2165	94.6074	94.6074	94.6948	94.9561	95.043	94.8691	94.6029	94.5938	95.043	95.3857	95.3896	94.9518	94.782	93.9883	94.6074	94.6497	94.3401	94.4325	94.2572	94.366	94.1694	94.2523	94.782	94.782	94.52
197	P. aeruginosa	93.624	94.0613	93.4519	93.624	93.5968	93.7907	93.7127	93.4464	93.0897	93.5352	93.1791	93.624	93.5352	93.8741	94.0613	93.5297	93.7127	93.8898	93.624	93.624	93.9781	93.8013	93.8013	93.4464	93.4464	93.3574	93.4464	93.5352	93.8013	93.4408	93.6077	94.5938	94.3257	94.2426	93.796	93.7127	93.4408	94.0664	94.2821	94.0613	93.8898	93.7127	93.8162	93.624	93.7074	94.0664	94.0664	94.0664
198	P. composti	95.0472	95.3031	94.8777	95.0472	96.1509	95.2125	95.1339	95.0472	94.7864	94.9603	94.612	94.8734	94.7864	95.1216	95.476	95.1298	95.1339	95.307	95.0472	94.8734	95.2205	95.4798	95.4798	94.8734	96.0814	95.9957	96.0814	95.9957	96.1669	95.9066	96.0715	95.9957	95.7346	95.7382	96.3346	96.1669	95.3031	95.7382	95.7023	95.3031	95.3935	95.2205	95.3388	95.1339	95.2165	95.4798	95.4798	95.4798
199	P. tianjinensis	95.4798	95.7346	95.6558	95.8241	95.2004	95.989	95.2205	95.4798	95.566	95.3935	95.0472	95.6522	95.566	95.4684	94.8691	95.476	95.566	95.7382	95.3935	95.6522	95.9957	95.91	95.91	95.1339	94.7864	94.6992	95.1339	95.0472	94.8734	94.6074	94.7732	95.3935	95.1298	95.1339	95.043	94.8734	95.7346	95.1339	96.1347	95.7346	95.8241	95.6522	95.6007	95.566	95.6485	95.6522	95.6522	96.0814
200	P. thermotolerans	94.0814	93.2797	93.8223	93.817	93.4352	94.0714	94.1694	93.9053	93.4631	93.9053	93.4631	93.9053	93.9053	94.5061	93.8118	94.2523	94.1694	94.2572	94.2572	93.9053	94.2572	93.9934	94.1694	93.6403	93.6403	93.5517	93.5517	93.6403	94.0814	93.7234	93.5352	93.6403	93.9001	93.817	93.9001	93.817	93.0123	93.0182	93.6751	93.2797	93.3743	93.2854	93.2045	93.1074	93.2797	94.1694	94.1694	94.2572
201	P. flexibilis	94.7864	94.52	94.6165	94.7864	94.8517	94.9518	94.8734	94.612	94.262	94.6992	94.3497	94.7864	94.6992	95.0346	94.8691	94.8691	94.8734	94.9603	94.9603	94.7864	95.1339	95.0472	95.0472	94.4372	94.9603	94.8734	94.9603	95.0472	95.2205	94.9561	95.1216	94.6992	95.043	95.0472	95.3031	95.1339	95.2165	94.9603	95.2674	94.52	94.7864	94.9603	95.076	94.6992	94.9561	94.7864	94.7864	94.612
202	P. tuomuerensis	94.6992	94.6074	94.7037	94.8734	94.9391	95.0388	94.7864	94.6992	94.3497	94.7864	94.4372	94.6992	94.612	94.9476	94.782	94.9561	94.9603	95.0472	94.8734	94.6992	95.0472	95.1339	95.1339	94.5247	95.0472	94.9603	95.0472	94.9603	95.1339	94.8691	95.0346	94.612	94.9561	94.9603	95.2165	95.0472	95.3031	95.0472	95.3546	94.6074	94.8734	95.0472	95.1637	94.7864	95.043	94.8734	94.8734	94.6992
203	Azotobacter beijerinckii	94.6992	93.7287	94.5293	94.6992	94.7643	94.5154	94.7864	94.5247	94.1743	94.6992	94.3497	94.6992	94.6992	94.7732	95.1298	94.9561	94.9603	94.6992	94.8734	94.6992	94.6992	94.1743	94.3497	94.612	94.612	94.6992	94.8734	94.9603	95.3935	95.043	94.8604	95.1339	95.3896	95.307	95.2165	95.1339	93.9053	94.5247	94.1247	93.7287	94.1743	94.1743	94.1046	93.9104	94.1694	94.5247	94.5247	94.262
204	Azotobacter chroococcum	94.782	94.1644	94.612	94.782	94.6723	94.9476	94.8691	94.6074	94.2572	94.782	94.4325	94.782	94.782	95.2044	95.2125	95.0388	95.043	95.1298	94.9561	94.782	95.1298	94.6074	94.782	94.52	94.8691	94.782	94.782	94.8691	95.3031	94.9518	94.7688	95.043	95.2992	95.2165	95.1257	95.043	93.9883	94.4325	94.5616	94.1644	94.2572	94.2572	94.366	93.9934	94.2523	94.9561	94.9561	94.6948
205	Azotobacter chroococcum (2)	94.782	94.1644	94.612	94.782	94.6723	94.9476	94.8691	94.6074	94.2572	94.782	94.4325	94.782	94.782	95.2044	95.2125	95.0388	95.043	95.1298	94.9561	94.782	95.1298	94.6074	94.782	94.52	94.8691	94.782	94.782	94.8691	95.3031	94.9518	94.7688	95.043	95.2992	95.2165	95.1257	95.043	93.9883	94.4325	94.5616	94.1644	94.2572	94.2572	94.366	93.9934	94.2523	94.9561	94.9561	94.6948
206	P. oryzae	94.0864	93.4631	93.7393	93.734	94.1496	94.0764	94.0864	93.9104	93.3799	93.9104	93.3799	93.9104	93.9985	94.1595	94.0814	93.9053	93.9985	94.1743	93.9985	93.9104	94.262	93.9985	94.1743	93.6457	94.1743	94.0864	94.0864	94.1743	94.3497	94.0814	93.9832	94.3497	94.2572	94.3497	94.52	94.4372	93.2854	93.734	93.8585	93.4631	93.5572	93.5572	93.6588	93.2911	93.5517	94.1743	94.1743	94.1743
207	P. guangdongensis	94.6992	94.782	94.7037	94.7864	94.7643	95.0388	94.7864	94.6992	94.612	94.9603	94.5247	94.6992	94.7864	94.8604	95.1298	94.8691	95.0472	95.2205	94.6992	94.6992	95.0472	94.7864	94.9603	94.8734	94.7864	94.6992	94.612	94.5247	94.7864	94.52	94.4231	95.6522	95.3896	95.4798	94.9561	94.8734	94.4325	95.0472	95.0927	94.782	94.8734	94.6992	94.9882	94.7864	94.6948	95.3935	95.3935	95.3935
208	P. linyingensis	94.7864	94.52	94.6165	94.7864	94.6768	94.9518	94.6992	94.612	94.262	94.8734	94.5247	94.7864	94.8734	94.6858	95.1298	94.6074	94.7864	94.9603	94.612	94.7864	94.6992	94.3497	94.6992	94.7864	94.7864	94.6992	94.612	94.6992	94.6992	94.6948	94.5108	95.4798	95.3896	95.307	94.782	94.8734	94.2572	94.8734	94.8299	94.52	94.5247	94.5247	94.636	94.262	94.52	94.9603	94.9603	94.9603
209	P. sagittaria	94.6074	94.3401	94.4372	94.6074	94.4968	94.7732	94.52	94.6074	94.0814	94.6948	94.3449	94.6074	94.6948	94.5061	94.9518	94.4278	94.6074	94.782	94.4325	94.6074	94.52	94.1694	94.52	94.6074	94.6074	94.52	94.4325	94.52	94.52	94.5154	94.3305	95.3031	95.2125	95.1298	94.6029	94.6948	94.2523	94.6948	94.6497	94.3401	94.52	94.3449	94.4546	94.0814	94.3401	94.782	94.782	94.782
210	P. pohangensis	95.8241	95.3896	95.6558	95.8241	95.9789	95.989	95.91	95.8241	95.307	95.91	95.6522	95.6522	95.7382	95.7275	95.9924	95.8206	95.9957	96.2523	95.6522	95.6522	95.91	95.91	96.0814	95.8241	96.1669	96.0814	95.9957	95.91	96.0814	95.9066	95.7275	96.0814	96.3346	96.2523	96.2492	96.3377	95.9066	95.8241	96.0484	95.3896	95.9957	95.6522	95.7747	95.566	95.6485	96.0814	96.0814	95.91
211	P. hussainii	93.4686	93.0182	93.2968	93.4686	93.2625	93.6349	93.5572	93.2911	93.2911	93.5572	93.2911	93.4686	93.5572	93.6294	93.9934	93.4631	93.6457	93.9104	93.4686	93.4686	93.8223	93.3799	93.5572	93.4686	93.4686	93.3799	93.2911	93.3799	93.6457	93.3743	93.1849	94.0864	94.3449	94.4372	93.9053	93.8223	93.3743	93.9985	94.036	93.0182	93.4686	93.6457	93.7482	93.5572	93.6403	93.8223	93.8223	93.6457
212	P. populi	93.6457	92.5707	93.7393	93.5572	94.0613	94.0764	93.3799	93.6457	93.1133	93.5572	93.0242	93.734	93.734	93.718	93.4631	93.7287	93.734	93.9985	93.5572	93.734	94.0864	93.9104	94.0864	93.4686	93.8223	93.8223	94.0864	93.9985	93.9104	93.6403	93.4519	93.4686	93.7287	93.734	94.1694	93.9985	92.9289	93.2023	93.5021	92.5707	92.8456	93.0242	93.2104	93.1133	93.0182	93.6457	93.6457	93.4686
213	P. yangmingensis	93.9053	93.1015	93.734	93.9053	93.7907	94.0714	93.9934	93.7287	93.4631	93.817	93.7287	93.9053	93.817	94.0664	94.3401	93.9001	93.9934	94.2572	93.9934	93.9053	94.2572	93.817	93.9934	93.7287	93.817	93.7287	93.817	93.9053	94.0814	93.8118	93.7127	94.4325	94.6903	94.6948	94.3401	94.1694	93.4575	94.0814	94.2967	93.1015	93.3743	93.7287	93.8321	93.4631	93.7234	94.1694	94.1694	93.9934
214	P. pelagia	94.5247	94.0814	94.2669	94.1743	94.3257	94.6029	94.612	94.5247	93.5572	94.3497	93.8223	94.262	94.1743	94.4231	94.1694	94.4325	94.5247	94.7864	94.4372	94.262	94.5247	94.7864	94.7864	94.262	94.262	94.1743	94.262	94.1743	94.262	94.0814	94.1595	94.4372	94.52	94.3497	94.4325	94.4372	94.2572	94.612	95.0927	94.0814	94.3497	94.5247	94.7242	94.612	94.52	94.9603	94.9603	94.6992
215	P. salina	94.4372	94.1694	94.1792	94.0864	94.2377	94.5154	94.5247	94.4372	93.4686	94.4372	93.734	94.1743	94.0864	94.3353	94.0814	94.3449	94.4372	94.6992	94.3497	94.1743	94.4372	94.6992	94.6992	94.1743	94.1743	94.0864	94.1743	94.0864	94.1743	93.9934	94.0714	94.3497	94.4325	94.262	94.3449	94.3497	94.52	94.8734	95.1801	94.1694	94.4372	94.7864	94.9882	94.6992	94.782	94.8734	94.8734	94.612
216	P. salegens	93.1133	92.3009	93.1191	93.2023	93.8846	93.3687	93.0242	93.1133	93.0242	93.2023	93.0242	93.0242	93.1133	93.1849	93.3743	93.1965	93.2023	93.4686	93.0242	93.0242	93.3799	93.2911	93.4686	93.0242	93.9104	93.8223	93.9104	93.8223	93.9104	93.6403	93.4519	93.2911	93.7287	93.8223	94.1694	94.0864	92.4809	92.7562	93.0542	92.3009	92.5771	92.3975	92.4873	92.3075	92.391	93.2911	93.2911	93.1133
217	P. profundi	94.7864	93.817	94.5293	94.4372	94.5015	94.8648	94.8734	94.612	93.9104	94.6992	94.262	94.6992	94.6992	94.9476	94.52	94.8691	94.8734	95.0472	94.8734	94.6992	94.9603	94.6992	94.8734	94.4372	94.4372	94.3497	94.3497	94.4372	94.612	94.6074	94.3353	94.8734	94.782	94.612	94.6948	94.6992	94.0814	94.262	94.8299	93.817	93.9985	94.3497	94.3708	94.0864	94.3449	95.0472	95.0472	94.9603
218	P. xinjiangensis	94.4325	93.8118	94.4372	94.6074	94.4968	94.7732	94.1694	94.4325	94.1694	94.1694	94.0814	94.4325	94.3449	94.1545	94.5154	94.1644	94.3449	94.6074	94.0814	94.4325	94.782	94.6948	94.8691	93.9053	94.0814	94.1694	94.4325	94.3449	94.1694	93.9001	93.8013	94.6074	94.6903	94.6948	94.4278	94.2572	94.1644	94.4325	94.7377	93.8118	94.0814	94.2572	94.543	94.3449	94.2523	94.6074	94.6074	94.4325
219	P. abyssi	94.612	93.9053	94.4419	94.612	95.2004	94.7776	94.3497	94.612	94.0864	94.262	93.9104	94.4372	94.3497	94.3353	94.3449	94.3449	94.3497	94.4372	94.262	94.4372	94.7864	94.6992	94.8734	94.0864	94.9603	94.8734	95.307	95.2205	95.0472	94.782	94.6858	94.3497	94.52	94.5247	95.1298	94.9603	94.2572	94.1743	94.5662	93.9053	94.3497	93.9985	94.2821	94.0864	93.9934	94.4372	94.4372	94.262
220	P. gallaeciensis	94.612	93.9053	94.4419	94.612	95.2004	94.7776	94.3497	94.612	94.0864	94.262	93.9104	94.4372	94.3497	94.3353	94.3449	94.3449	94.3497	94.4372	94.262	94.4372	94.7864	94.6992	94.8734	94.0864	94.9603	94.8734	95.307	95.2205	95.0472	94.782	94.6858	94.3497	94.52	94.5247	95.1298	94.9603	94.2572	94.1743	94.5662	93.9053	94.3497	93.9985	94.2821	94.0864	93.9934	94.4372	94.4372	94.262
221	P. pachastrellae	94.4325	93.7234	94.262	94.4325	95.0221	94.5983	94.1694	94.4325	93.9053	94.0814	93.7287	94.2572	94.1694	94.1545	94.1644	94.1644	94.1694	94.2572	94.0814	94.2572	94.6074	94.52	94.6948	94.2572	95.1298	95.043	95.1298	95.043	94.8691	94.6029	94.5061	94.1694	94.3401	94.3449	94.9518	94.782	94.0764	93.9934	94.3851	93.7234	94.1694	93.817	93.9214	93.7287	93.8118	94.2572	94.2572	94.0814
222	P. aestusnigri	94.3497	93.6403	94.1792	94.3497	95.0263	94.5154	94.0864	94.3497	93.9104	93.9985	93.6457	94.1743	94.0864	94.0714	94.1694	94.0814	94.0864	94.1743	93.9985	94.1743	94.5247	94.4372	94.612	93.8223	94.7864	94.6992	95.1339	95.0472	94.8734	94.6074	94.5108	94.1743	94.3449	94.3497	94.9561	94.7864	93.817	93.9985	94.3016	93.6403	93.9104	93.734	94.0156	93.8223	93.7287	94.262	94.262	94.0864
223	P. oceani	94.3497	93.6403	94.1792	94.3497	95.0263	94.5154	94.0864	94.3497	93.9104	93.9985	93.6457	94.1743	94.0864	94.0714	94.1694	94.0814	94.0864	94.1743	93.9985	94.1743	94.5247	94.4372	94.612	93.8223	94.7864	94.6992	95.1339	95.0472	94.8734	94.6074	94.5983	94.1743	94.3449	94.3497	94.9561	94.7864	93.817	93.9985	94.3016	93.6403	93.9104	93.734	93.8374	93.6457	93.7287	94.262	94.262	94.0864
224	P. sabulinigri	94.6992	93.9053	94.5293	94.6992	95.2873	94.8648	94.4372	94.6992	94.3497	94.4372	94.1743	94.5247	94.5247	94.5108	94.3449	94.52	94.5247	94.7864	94.3497	94.5247	94.8734	94.9603	95.1339	94.0864	94.9603	94.8734	95.2205	95.1339	95.0472	94.782	94.5983	94.5247	94.6948	94.6992	95.3031	95.1339	94.6074	94.3497	94.8299	93.9053	94.3497	94.3497	94.4593	94.262	94.3449	94.6992	94.6992	94.5247
225	P. formosensis	93.0123	93.1849	93.0182	93.3687	93.5187	93.3574	93.1015	93.0123	92.8334	93.1015	93.0123	93.0123	92.9229	93.3517	93.1849	93.363	93.2797	93.4575	93.2797	93.0123	93.3687	93.1907	93.1907	92.8334	93.3687	93.2797	93.3687	93.2797	93.5462	93.1849	93.2625	93.7234	93.4519	93.3687	93.5407	93.4575	93.8065	93.5462	94.2033	93.1849	93.6349	93.6349	93.6479	93.5462	93.6294	93.6349	93.6349	93.8118
226	P. pertucinogena	92.8681	92.3187	92.6939	92.8681	93.1085	93.0362	92.5972	92.8681	92.2344	92.416	92.1435	92.6876	92.5972	92.6876	92.5908	92.6813	92.5972	92.7779	92.5972	92.6876	93.0482	93.2278	93.2278	92.1435	92.6876	92.7779	93.0482	92.9582	92.8681	92.5002	92.578	92.7779	92.6813	92.5972	92.862	92.7779	92.5002	92.5972	93.0122	92.3187	92.416	92.5972	92.6899	92.5067	92.5908	92.7779	92.7779	92.9582
227	P. litoralis	93.9104	93.5517	93.7393	93.9104	94.7643	94.0764	93.9985	93.9104	93.4686	93.8223	93.5572	93.734	93.6457	93.9832	93.9934	93.9934	93.9985	94.1743	93.9104	93.734	94.0864	94.3497	94.3497	93.734	94.612	94.5247	94.612	94.5247	94.6992	94.4325	94.5108	94.3497	94.2572	94.262	94.8691	94.6992	94.2572	94.1743	94.5662	93.5517	93.9985	93.9985	94.1046	93.9104	93.9934	94.1743	94.1743	94.1743
228	P. xiamenensis	92.8395	92.6542	92.7562	93.1965	93.6132	93.0956	92.5707	92.8395	92.75	92.4809	92.4809	92.75	92.6604	92.7314	92.6542	92.7438	92.6604	92.8395	92.6604	92.75	93.1074	93.2854	93.2854	92.391	93.1074	93.0182	93.4631	93.3743	93.1965	92.9229	93.0003	93.1965	92.9229	92.9289	93.3687	93.1965	93.0123	93.0182	93.5858	92.6542	92.9289	93.1074	93.1144	93.0182	93.1015	92.9289	92.9289	93.2854
229	P. bauzanensis	93.9104	93.6403	93.7393	93.8223	94.7643	94.0764	93.9985	93.9104	93.2911	93.8223	93.4686	93.734	93.6457	93.9832	94.0814	93.9934	93.9985	94.1743	93.9104	93.734	94.0864	94.3497	94.3497	93.734	94.6992	94.612	94.6992	94.612	94.7864	94.52	94.5983	94.4372	94.3449	94.3497	94.9561	94.7864	94.3449	94.612	94.7421	93.6403	93.9104	94.262	94.1934	93.9985	94.2572	94.0864	94.0864	94.1743
230	P. saudomassiliensis	93.817	94.1644	93.9104	94.3449	94.0563	94.2475	93.9053	93.817	93.9053	93.9934	93.9934	93.9053	93.817	94.2426	93.9883	94.2523	94.1694	94.3449	94.1694	93.9053	94.2572	94.2572	94.2572	93.7287	93.9053	93.817	93.9053	93.817	93.9934	93.7234	93.8013	94.52	94.2523	94.2572	94.1644	93.9934	94.4278	94.3449	95.176	94.1644	94.4325	94.6074	94.6314	94.52	94.6029	94.4325	94.4325	94.782
231	Ventosimonas gracilis	88.5979	87.6336	88.5132	88.4082	88.5476	88.7674	88.5031	88.5979	88.1227	88.3132	87.8362	88.5979	88.5031	88.7575	88.7772	88.5979	88.5031	88.6925	88.7871	88.5979	88.8815	88.5979	88.5979	88.218	88.4082	88.5031	88.5979	88.6925	88.5979	88.398	88.4727	88.8815	88.7772	88.5979	88.6826	88.6925	87.4413	87.7404	88.0171	87.6336	87.8362	87.5486	87.6839	87.5486	87.5375	88.6925	88.6925	88.9758
232	P. caeni	93.5572	93.4631	93.7393	93.4686	93.1732	93.6349	93.6457	93.5572	92.8456	93.8223	93.0242	93.6457	93.5572	93.274	93.1965	93.6403	93.9104	93.734	93.6457	93.6457	93.3799	93.4686	93.4686	93.4686	92.7562	92.6667	93.1133	93.0242	93.1133	92.9289	93.0956	94.0864	93.817	93.6457	93.1965	93.2023	93.4631	93.9104	93.7695	93.4631	93.9104	93.734	93.4797	93.6457	93.7287	93.734	93.734	93.8223
233	Oblitimonas alkaliphila	93.3574	92.9047	93.5407	93.4464	93.7748	93.4352	93.4464	93.4464	92.9108	93.5352	93.0003	93.4464	93.3574	93.4296	93.0838	93.796	93.7127	93.4464	93.7127	93.4464	93.4464	93.624	93.4464	93.4464	93.4464	93.4464	93.8013	93.7127	93.8898	93.6186	93.7854	93.4464	93.5297	93.5352	93.973	93.8013	93.4408	93.5352	93.5693	92.9047	93.3574	93.5352	93.3673	93.4464	93.5297	93.3574	93.3574	93.2683
234	Thiopseudomonas denitrificans X2	91.584	91.029	91.5003	91.493	92.0934	91.7514	91.3108	91.402	91.0367	91.1282	90.6696	91.584	91.493	91.5622	91.3033	91.3033	91.3108	91.402	91.493	91.584	91.9466	92.037	91.8561	91.0367	91.6748	91.584	92.037	92.1273	91.9466	91.6676	91.8351	91.584	91.3946	91.402	92.0302	91.8561	91.3946	91.3108	91.511	91.029	91.1282	91.3108	91.3893	91.2196	91.3033	91.493	91.493	91.6748
235	Thiopseudomonas denitrificans DSM 28679	91.7655	91.212	91.6819	91.6748	92.2745	91.9328	91.493	91.584	91.2196	91.3108	90.8534	91.7655	91.6748	91.7443	91.4857	91.4857	91.493	91.584	91.6748	91.7655	92.1273	92.2175	92.037	91.2196	91.8561	91.7655	92.2175	92.3075	92.1273	91.8491	92.0165	91.7655	91.5767	91.584	92.2108	92.037	91.5767	91.493	91.6942	91.212	91.3108	91.493	91.5734	91.402	91.4857	91.6748	91.6748	91.8561
236	Cellvibrio japonicum	91.3033	90.5694	91.3108	91.212	91.1739	91.6533	91.029	91.1205	90.6615	91.212	90.8455	91.4857	91.3946	91.2808	90.9294	91.1129	91.212	91.3946	91.3033	91.4857	91.3946	91.212	91.3946	91.3033	91.1205	91.029	91.1205	91.212	90.9373	90.7455	90.8217	91.4857	91.2044	91.029	91.0212	91.029	90.8375	90.8455	91.2277	90.5694	90.9373	90.8455	90.8263	90.8455	90.8375	91.3033	91.3033	91.5767
237	Escherichia coli	83.5142	83.7177	83.4275	83.7177	83.5408	83.7896	83.208	83.4123	83.4123	83.3102	83.3102	83.616	83.5142	83.3971	83.4991	83.1926	83.3102	83.4123	83.3102	83.616	83.616	83.5142	83.5142	83.5142	83.616	83.5142	83.5142	83.616	83.5142	83.2949	83.2642	83.8192	83.7028	83.616	83.3971	83.3102	83.9059	83.9206	84.3114	83.7177	84.0218	83.8192	83.9179	83.8192	83.8044	83.9206	83.9206	83.616
238	Azomonas agilis	95.3935	94.6074	95.6558	95.7382	95.2004	95.5586	95.1339	95.3935	95.6522	95.4798	95.1339	95.566	95.6522	95.1216	94.6948	95.476	95.566	95.307	95.307	95.566	95.566	95.2205	95.3935	95.2205	94.6992	94.612	95.2205	95.1339	95.0472	94.782	94.5983	95.0472	95.2165	95.307	95.1298	95.0472	95.5623	94.9603	95.4416	94.6074	95.566	95.307	95.2513	95.1339	95.3031	95.307	95.307	95.4798
239	Entomomonas moraniae	90.0878	88.6577	90.0027	89.9939	90.0441	90.258	89.6174	90.0878	89.523	89.7117	89.3338	90.0878	90.0878	89.5899	90.2666	89.4284	89.7117	89.8059	89.523	90.0878	89.9939	89.9	90.0878	89.6174	89.9	89.9939	90.1815	90.2751	89.9	89.7027	89.5899	89.9	90.2666	90.0878	89.8911	89.9	88.8488	89.4284	89.3343	88.6577	88.8586	88.9539	89.1042	89.1441	88.9441	89.8059	89.8059	89.4284
[truncated: 191 more columns]
