# Supplementary material for: Genomics in Bacterial Taxonomy: Impact on the Genus Pseudomonas
Source: Genes (Basel). 2020 Jan 29;11(2):139. doi: 10.3390/genes11020139 (PMC7074058; doi:10.3390/genes11020139)
Supplement: Supplementary file 1 [file genes-11-00139-s001.zip › TableS3_4Concagenes 140120_MG.xlsx]

## Sheet: hoja1
	Supplementary Table S3. Four-gene MLSA similarity matrix (16S rDNA, gyrB, rpoB and rpoD) for all species and subspecies of Pseudomonas type strains studied; closest genera were also included.
		1	2	3	4	5	6	7	8	9	10	11	12	13	14	15	16	17	18	19	20	21	22	23	24	25	26	27	28	29	30	31	32	33	34	35	36	37	38	39	40	41	42	43	44	45	46	47	48
1	P. lurida	100	91.2815	97.2436	96.7884	96.3541	96.6151	96.158	95.6962	96.1293	95.5803	95.5223	95.0566	94.8226	95.6056	95.492	95.724	95.0246	95.4643	94.1459	95.4933	95.348	94.4361	95.9852	95.1733	94.9981	95.5223	95.7216	95.6383	94.5585	95.1427	93.6606	94.3525	94.4393	94.5291	94.4098	94.5879	89.6894	91.3379	90.4536	91.2815	92.5866	92.0409	92.8593	92.7676	92.4029	93.4723	93.909	93.7903
2	P. taetrolens	91.2815	100	91.1586	91.7103	91.1149	91.6444	91.7409	91.1586	91.6492	91.2815	91.5269	90.1675	90.7885	91.4582	91.2175	91.6468	91.1534	91.8019	90.7576	91.2508	91.1586	90.4081	91.0354	90.5717	90.1675	90.5407	90.7495	90.7576	90.7266	91.0328	91.174	91.7714	91.5856	91.6492	91.2483	91.343	91.8229	92.9762	93.2926	100	94.3756	93.813	94.6782	94.5229	94.4624	91.8064	91.7409	91.7714
3	P. simiae	97.2436	91.1586	100	97.0163	96.2678	96.8152	96.3305	95.5803	96.4166	95.8697	95.783	95.0274	94.8812	95.5476	95.2302	95.5791	95.4326	95.4643	94.0571	95.2607	95.4933	94.7595	96.3018	95.3189	94.8226	95.0858	95.5766	95.4352	94.2935	94.7038	93.362	94.1163	94.2328	94.5291	94.085	94.205	90.0965	91.3993	90.3913	91.1586	92.6168	92.4959	93.0403	92.7073	92.4635	93.7112	94.0571	94.1459
4	P. canadensis	96.7884	91.7103	97.0163	100	96.4115	96.9292	96.3018	95.8697	96.3018	95.783	96.014	94.8812	94.7053	95.4604	95.2885	95.724	94.8783	95.348	94.0571	95.5223	96.1293	94.3772	95.7252	95.348	95.1441	95.5223	95.6926	95.5803	94.6467	95.0552	93.958	94.676	94.6745	95.1149	94.6451	94.9689	90.0965	91.5526	90.7023	91.7103	92.7977	92.4051	93.1908	92.8278	92.5542	93.7112	93.8794	93.8497
5	P. azotoformans	96.3541	91.1149	96.2678	96.4115	100	97.3518	96.4115	95.8061	96.6695	95.254	95.6031	95.0788	94.8153	95.0454	95.1359	95.2527	94.9589	95.0496	94.2558	95.254	95.2832	94.5461	95.6322	94.9618	95.1373	95.7481	96.1494	95.8639	94.5802	95.2235	93.741	94.3149	94.1951	94.5214	94.6375	94.7272	89.9254	91.6935	90.502	91.1149	92.1208	92.0904	93.0605	92.5759	92.1489	93.403	93.7517	93.573
6	P. extremorientalis	96.6151	91.6444	96.8152	96.9292	97.3518	100	96.6151	95.8963	96.5292	95.6358	96.1847	95.2289	95.1414	95.7192	95.4313	95.8084	95.2553	95.5488	94.526	95.4908	95.7517	94.8739	96.271	94.9368	94.7317	95.258	95.5451	95.8096	94.4671	94.9646	93.5675	94.4966	94.4361	94.8197	94.2886	94.3788	89.8089	91.5477	90.7589	91.6444	92.3705	92.3098	93.2772	92.7935	92.5197	93.7673	94.2607	94.1721
7	P. aylmerense	96.158	91.7409	96.3305	96.3018	96.4115	96.6151	100	95.8697	96.5312	95.2316	95.8986	95.348	95.0566	95.7216	95.6371	95.7819	95.3454	95.6093	94.5291	95.4643	95.4643	94.7595	95.812	94.9104	94.5291	94.9104	95.2275	95.1441	94.4114	95.0552	93.7797	94.676	94.7332	94.7347	94.8797	94.7933	89.8149	91.5526	90.7333	91.7409	92.4051	92.1322	93.2209	92.6469	92.312	93.9494	94.205	93.909
8	P. costantinii	95.6962	91.1586	95.5803	95.8697	95.8061	95.8963	95.8697	100	95.9275	95.2024	95.5513	94.8812	94.7053	94.8768	94.6745	94.9382	94.6142	95.0566	93.9387	95.0858	95.1149	94.3477	95.1149	94.676	94.4997	94.9689	94.7889	94.9981	94.0571	94.5864	93.1823	93.6119	93.8776	94.323	94.1738	93.9387	90.0965	91.2765	90.3913	91.1586	92.3748	91.9191	92.5869	92.2839	92.2514	93.4723	93.9979	93.8794
9	P. salomonii	96.1293	91.6492	96.4166	96.3018	96.6695	96.5292	96.5312	95.9275	100	95.9852	96.5884	95.3771	95.4933	95.6926	95.5211	95.8108	95.6358	95.6383	94.5879	95.4643	95.4933	94.9646	95.9275	95.3771	95.0858	95.4062	95.7216	95.4933	94.8226	95.1427	93.6606	94.323	94.4393	94.7933	94.4981	94.5291	90.1277	91.5526	90.7953	91.6492	92.4051	92.7073	93.281	93.0082	92.7353	94.1571	94.2935	94.4114
10	P. antarctica	95.5803	91.2815	95.8697	95.783	95.254	95.6358	95.2316	95.2024	95.9852	100	96.1005	94.9689	94.8812	95.14	94.8504	95.2885	94.9661	95.1441	93.7309	94.764	94.9104	93.8445	94.9689	94.9397	94.8812	94.8812	95.1108	94.8812	94.676	95.026	93.2722	93.9683	94.7918	94.7347	94.3214	94.3525	90.0965	91.215	90.578	91.2815	92.3748	92.2233	92.9499	93.0082	92.3423	93.562	93.7606	93.9683
11	P. fluorescens	95.5223	91.5269	95.783	96.014	95.6031	96.1847	95.8986	95.5513	96.5884	96.1005	100	94.9397	94.8812	95.1108	94.9382	95.2302	95.1997	94.9981	93.8497	94.7933	94.9689	93.9928	94.8226	94.8519	94.6173	94.6467	95.2275	95.1441	94.676	95.1136	93.4517	93.7309	94.3214	94.7347	94.0555	94.1163	89.7208	91.1534	90.4225	91.5269	92.4051	91.9496	92.8593	92.5866	92.3423	93.3226	93.6417	93.9683
12	P. poae	95.0566	90.1675	95.0274	94.8812	95.0788	95.2289	95.348	94.8812	95.3771	94.9689	94.9397	100	96.7884	94.7008	94.3214	94.6745	94.7023	95.1149	93.5524	94.6173	94.6173	93.517	94.676	94.7347	94.1459	94.4703	94.7008	94.6467	93.82	94.2033	92.8216	93.224	94.1442	93.8497	93.848	93.909	89.3747	90.7522	89.7341	90.1675	91.7055	91.675	92.4959	91.9496	91.7337	92.8415	93.224	93.194
13	P. trivialis	94.8226	90.7885	94.8812	94.7053	94.8153	95.1414	95.0566	94.7053	95.4933	94.8812	94.8812	96.7884	100	94.8182	94.3214	94.9675	94.6142	94.8812	93.3436	94.4703	94.4114	93.6065	94.676	94.5879	94.0275	94.2935	94.5539	94.676	93.9683	94.2624	92.8517	93.2838	94.0555	94.1754	93.8776	93.7309	89.3116	90.4731	90.1104	90.7885	91.9191	91.3072	92.344	91.9496	91.4582	92.8716	93.3734	92.9842
14	P. marginalis	95.6056	91.4582	95.5476	95.4604	95.0454	95.7192	95.7216	94.8768	95.6926	95.14	95.1108	94.7008	94.8182	100	98.6469	98.4795	95.3706	95.9241	94.4361	94.9939	94.9646	94.1359	94.5539	95.14	94.1409	94.7595	95.1943	95.1108	94.4656	94.8754	93.5059	94.2886	94.7874	94.7595	94.464	94.3477	89.586	90.9606	91.0093	91.4582	92.3986	91.9731	93.0041	92.701	92.1231	93.9739	94.2	94.1409
15	P. panacis	95.492	91.2175	95.2302	95.2885	95.1359	95.4313	95.6371	94.6745	95.5211	94.8504	94.9382	94.3214	94.3214	98.6469	100	97.7511	94.8182	95.8975	94.0258	95.0552	94.7332	93.9614	94.3214	94.8797	94.557	95.1719	95.2262	95.2302	94.2033	94.8783	93.6886	94.6158	94.8197	94.8504	94.673	94.557	89.4977	91.3968	90.7926	91.2175	92.2817	91.9168	93.0082	92.5844	92.0972	93.9774	94.1146	93.937
16	P. grimontii	95.724	91.6468	95.5791	95.724	95.2527	95.8084	95.7819	94.9382	95.8108	95.2885	95.2302	94.6745	94.9675	98.4795	97.7511	100	95.4023	96.0129	94.4393	95.3176	94.909	94.1096	94.7038	95.2302	94.2033	94.8797	95.2262	95.1136	94.5276	94.9953	93.8672	94.4393	94.8783	94.7332	94.5554	94.4981	89.8119	91.4889	91.1328	91.6468	92.4937	92.221	92.9478	92.7353	92.431	94.0368	94.0555	94.2328
17	P. extremoaustralis	95.0246	91.1534	95.4326	94.8783	94.9589	95.2553	95.3454	94.6142	95.6358	94.9661	95.1997	94.7023	94.6142	95.3706	94.8182	95.4023	100	96.0695	93.8759	94.4377	94.7023	94.0783	94.4966	94.3198	94.1425	94.3788	94.4624	94.673	94.1425	94.3477	92.727	93.4294	94.1113	94.1425	93.9632	94.0538	89.7461	91.0558	90.6658	91.1534	92.158	91.9145	92.2787	92.5218	91.9121	93.1085	93.3995	93.5785
18	P. veronii	95.4643	91.8019	95.4643	95.348	95.0496	95.5488	95.6093	95.0566	95.6383	95.1441	94.9981	95.1149	94.8812	95.9241	95.8975	96.0129	96.0695	100	93.909	95.3771	95.1441	94.4066	95.0274	95.0274	94.5291	95.0858	95.2567	94.9397	94.4114	94.7625	93.3022	94.8519	94.4981	94.8226	94.6158	94.7053	90.1277	91.7055	90.8572	91.8019	92.7977	92.5261	93.3411	93.2181	92.5844	94.1275	94.323	94.264
19	P. rhodesiae	94.1459	90.7576	94.0571	94.0571	94.2558	94.526	94.5291	93.9387	94.5879	93.7309	93.8497	93.5524	93.3436	94.4361	94.0258	94.4393	93.8759	93.909	100	94.9689	94.1754	93.5469	93.9683	93.8497	93.3734	93.4331	93.8445	93.7606	92.8039	93.4611	92.2165	92.7738	93.1322	93.3734	93.3118	93.0742	89.2801	90.3487	89.8597	90.7576	91.1842	91.3993	92.0086	91.5526	91.5808	92.5089	92.4117	92.3814
20	P. kairouanensis	95.4933	91.2508	95.2607	95.5223	95.254	95.4908	95.4643	95.0858	95.4643	94.764	94.7933	94.6173	94.4703	94.9939	95.0552	95.3176	94.4377	95.3771	94.9689	100	96.617	94.9939	95.2024	94.5879	93.82	93.9979	94.5539	94.9689	93.7606	94.2624	93.1523	93.909	94.3214	94.7053	94.4981	94.5291	89.658	91.3993	90.7333	91.2508	92.1625	92.1018	92.6475	92.1929	92.2817	93.1425	93.2838	93.3137
21	P. nabeulensis	95.348	91.1586	95.4933	96.1293	95.2832	95.7517	95.4643	95.1149	95.4933	94.9104	94.9689	94.6173	94.4114	94.9646	94.7332	94.909	94.7023	95.1441	94.1754	96.617	100	95.4604	95.2898	94.4703	93.8497	94.2345	94.6421	94.8519	93.82	94.1146	93.6904	94.2935	94.6745	94.8226	94.4687	94.4997	90.2213	91.675	90.0478	91.1586	92.0105	91.4607	92.4959	92.1929	92.0995	93.3825	93.4928	93.3137
22	P. palleroniana	94.4361	90.4081	94.7595	94.3772	94.5461	94.8739	94.7595	94.3477	94.9646	93.8445	93.9928	93.517	93.6065	94.1359	93.9614	94.1096	94.0783	94.4066	93.5469	94.9939	95.4604	100	95.4313	93.4574	93.1582	93.3677	94.3724	93.9632	93.2181	93.7535	92.94	93.3079	93.5748	93.785	93.694	93.3976	89.4915	91.0841	89.945	90.4081	91.4225	91.3304	92.0017	91.6065	91.4814	92.8655	93.2481	92.9782
23	P. tolaasii	95.9852	91.0354	96.3018	95.7252	95.6322	96.271	95.812	95.1149	95.9275	94.9689	94.8226	94.676	94.676	94.5539	94.3214	94.7038	94.4966	95.0274	93.9683	95.2024	95.2898	95.4313	100	93.9979	94.1163	94.4997	94.7889	94.9689	93.4928	93.937	93.2722	93.9979	93.8183	94.0275	93.9962	93.8794	89.8776	91.1534	90.0165	91.0354	92.0409	91.522	92.5869	92.1625	92.221	93.6515	93.8497	93.5226
24	P. orientales	95.1733	90.5717	95.3189	95.348	94.9618	94.9368	94.9104	94.676	95.3771	94.9397	94.8519	94.7347	94.5879	95.14	94.8797	95.2302	94.3198	95.0274	93.8497	94.5879	94.4703	93.4574	93.9979	100	95.5803	95.4352	94.7889	94.2935	94.6173	94.9382	92.7915	93.3436	93.9962	94.3525	93.8183	94.0275	89.0587	90.4731	90.2666	90.5717	92.0714	91.675	92.1917	92.1625	91.8253	92.7811	92.9842	93.1641
25	P. cedrina subsp. cedrina	94.9981	90.1675	94.8226	95.1441	95.1373	94.7317	94.5291	94.4997	95.0858	94.8812	94.6173	94.1459	94.0275	94.1409	94.557	94.2033	94.1425	94.5291	93.3734	93.82	93.8497	93.1582	94.1163	95.5803	100	97.5266	94.8182	94.6467	94.7053	94.909	93.2123	93.224	93.6399	94.323	94.2033	94.3819	88.8367	90.5662	89.6397	90.1675	91.3379	91.1534	91.8557	91.675	91.3047	92.7811	93.224	93.1341
26	P. cedrina subsp. fulgida	95.5223	90.5407	95.0858	95.5223	95.7481	95.258	94.9104	94.9689	95.4062	94.8812	94.6467	94.4703	94.2935	94.7595	95.1719	94.8797	94.3788	95.0858	93.4331	93.9979	94.2345	93.3677	94.4997	95.4352	97.5266	100	94.9646	94.764	94.764	95.1136	93.362	93.4928	93.848	94.3525	94.4098	94.2935	89.3432	90.8759	90.0478	90.5407	91.675	91.4607	92.1917	92.1322	91.4889	93.2026	93.463	93.2539
27	P. lactis	95.7216	90.7495	95.5766	95.6926	96.1494	95.5451	95.2275	94.7889	95.7216	95.1108	95.2275	94.7008	94.5539	95.1943	95.2262	95.2262	94.4624	95.2567	93.8445	94.5539	94.6421	94.3724	94.7889	94.7889	94.8182	94.9646	100	96.8143	95.5185	95.9229	94.2197	94.0224	94.5523	94.8182	94.7581	95.0231	89.586	91.3611	90.3829	90.7495	91.6677	91.6983	92.7623	92.3076	91.9098	93.4367	93.666	93.7553
28	P. paralactis	95.6383	90.7576	95.4352	95.5803	95.8639	95.8096	95.1441	94.9981	95.4933	94.8812	95.1441	94.6467	94.676	95.1108	95.2302	95.1136	94.673	94.9397	93.7606	94.9689	94.8519	93.9632	94.9689	94.2935	94.6467	94.764	96.8143	100	95.2316	95.6661	93.8095	93.82	94.5864	94.8812	94.7918	94.8519	89.2485	90.9994	90.3913	90.7576	91.8582	91.8582	92.4655	92.0714	91.9473	92.9018	93.224	93.2838
29	P. libaniensis	94.5585	90.7266	94.2935	94.6467	94.5802	94.4671	94.4114	94.0571	94.8226	94.676	94.676	93.82	93.9683	94.4656	94.2033	94.5276	94.1425	94.4114	92.8039	93.7606	93.82	93.2181	93.4928	94.6173	94.7053	94.764	95.5185	95.2316	100	98.5644	93.75	93.6715	94.4098	94.6467	94.2328	94.4114	89.3432	90.9068	90.0478	90.7266	91.2765	91.2457	91.7945	91.5526	91.3047	93.1425	93.2539	93.2838
30	P. synxantha	95.1427	91.0328	94.7038	95.0552	95.2235	94.9646	95.0552	94.5864	95.1427	95.026	95.1136	94.2033	94.2624	94.8754	94.8783	94.9953	94.3477	94.7625	93.4611	94.2624	94.1146	93.7535	93.937	94.9382	94.909	95.1136	95.9229	95.6661	98.5644	100	93.7779	93.8776	94.5848	94.7625	94.6436	94.6745	89.4977	91.1509	90.4819	91.0328	91.8558	91.7948	92.3113	92.0691	91.7619	93.3206	93.5207	93.5803
31	P. mucidolens	93.6606	91.174	93.362	93.958	93.741	93.5675	93.7797	93.1823	93.6606	93.2722	93.4517	92.8216	92.8517	93.5059	93.6886	93.8672	92.727	93.3022	92.2165	93.1523	93.6904	92.94	93.2722	92.7915	93.2123	93.362	94.2197	93.8095	93.75	93.7779	100	95.1359	95.1637	95.0774	95.1929	95.1359	89.9851	91.8135	90.6549	91.174	91.8746	91.3536	92.1476	92.2402	92.1162	93.8216	94.0766	93.5712
32	P. yamanorum	94.3525	91.7714	94.1163	94.676	94.3149	94.4966	94.676	93.6119	94.323	93.9683	93.7309	93.224	93.2838	94.2886	94.6158	94.4393	93.4294	94.8519	92.7738	93.909	94.2935	93.3079	93.9979	93.3436	93.224	93.4928	94.0224	93.82	93.6715	93.8776	95.1359	100	96.0417	95.8986	95.9841	95.9563	89.9089	92.0105	90.7953	91.7714	92.8278	91.8277	93.0403	92.888	92.524	93.9791	94.3819	94.0867
33	P. brenneri	94.4393	91.5856	94.2328	94.6745	94.1951	94.4361	94.7332	93.8776	94.4393	94.7918	94.3214	94.1442	94.0555	94.7874	94.8197	94.8783	94.1113	94.4981	93.1322	94.3214	94.6745	93.5748	93.8183	93.9962	93.6399	93.848	94.5523	94.5864	94.4098	94.5848	95.1637	96.0417	100	97.1576	97.0724	97.1576	89.7492	91.8863	90.8236	91.5856	92.3423	92.0082	93.249	92.5542	92.3705	93.7988	94.1442	93.7886
34	P. proteolytica	94.5291	91.6492	94.5291	95.1149	94.5214	94.8197	94.7347	94.323	94.7933	94.7347	94.7347	93.8497	94.1754	94.7595	94.8504	94.7332	94.1425	94.8226	93.3734	94.7053	94.8226	93.785	94.0275	94.3525	94.323	94.3525	94.8182	94.8812	94.6467	94.7625	95.0774	95.8986	97.1576	100	97.6107	97.1868	89.6894	91.5832	90.8882	91.6492	92.4959	92.0714	92.9197	92.4051	92.1906	93.6515	94.1163	93.7606
35	P. gessardii	94.4098	91.2483	94.085	94.6451	94.6375	94.2886	94.8797	94.1738	94.4981	94.3214	94.0555	93.848	93.8776	94.464	94.673	94.5554	93.9632	94.6158	93.3118	94.4981	94.4687	93.694	93.9962	93.8183	94.2033	94.4098	94.7581	94.7918	94.2328	94.6436	95.1929	95.9841	97.0724	97.6107	100	97.8925	89.4031	91.4275	90.4819	91.2483	92.0691	91.9778	92.827	92.4332	91.945	93.3506	93.848	93.4909
36	P. meridiana	94.5879	91.343	94.205	94.9689	94.7272	94.3788	94.7933	93.9387	94.5291	94.3525	94.1163	93.909	93.7309	94.3477	94.557	94.4981	94.0538	94.7053	93.0742	94.5291	94.4997	93.3976	93.8794	94.0275	94.3819	94.2935	95.0231	94.8519	94.4114	94.6745	95.1359	95.9563	97.1576	97.1868	97.8925	100	89.4693	91.5832	90.5158	91.343	92.4051	92.1625	92.8593	92.5564	92.1603	93.8899	94.264	93.8794
37	P. endophytica	89.6894	91.8229	90.0965	90.0965	89.9254	89.8089	89.8149	90.0965	90.1277	90.0965	89.7208	89.3747	89.3116	89.586	89.4977	89.8119	89.7461	90.1277	89.2801	89.658	90.2213	89.4915	89.8776	89.0587	88.8367	89.3432	89.586	89.2485	89.3432	89.4977	89.9851	89.9089	89.7492	89.6894	89.4031	89.4693	100	95.0217	90.9705	91.8229	92.0622	91.9098	91.6006	92.0926	92.0599	90.221	90.5014	90.377
38	P. helleri	91.3379	92.9762	91.3993	91.5526	91.6935	91.5477	91.5526	91.2765	91.5526	91.215	91.1534	90.7522	90.4731	90.9606	91.3968	91.4889	91.0558	91.7055	90.3487	91.3993	91.675	91.0841	91.1534	90.4731	90.5662	90.8759	91.3611	90.9994	90.9068	91.1509	91.8135	92.0105	91.8863	91.5832	91.4275	91.5832	95.0217	100	92.1399	92.9762	93.1523	92.701	93.6052	93.601	93.7184	91.8934	92.2839	91.8582
39	P. lundensis	90.4536	93.2926	90.3913	90.7023	90.502	90.7589	90.7333	90.3913	90.7953	90.578	90.4225	89.7341	90.1104	91.0093	90.7926	91.1328	90.6658	90.8572	89.8597	90.7333	90.0478	89.945	90.0165	90.2666	89.6397	90.0478	90.3829	90.3913	90.0478	90.4819	90.6549	90.7953	90.8236	90.8882	90.4819	90.5158	90.9705	92.1399	100	93.2926	93.1386	92.9881	93.2918	93.0182	93.4068	91.1998	91.2279	91.2587
40	P. taetrolens	91.2815	100	91.1586	91.7103	91.1149	91.6444	91.7409	91.1586	91.6492	91.2815	91.5269	90.1675	90.7885	91.4582	91.2175	91.6468	91.1534	91.8019	90.7576	91.2508	91.1586	90.4081	91.0354	90.5717	90.1675	90.5407	90.7495	90.7576	90.7266	91.0328	91.174	91.7714	91.5856	91.6492	91.2483	91.343	91.8229	92.9762	93.2926	100	94.3756	93.813	94.6782	94.5229	94.4624	91.8064	91.7409	91.7714
41	P. versuta	92.5866	94.3756	92.6168	92.7977	92.1208	92.3705	92.4051	92.3748	92.4051	92.3748	92.4051	91.7055	91.9191	92.3986	92.2817	92.4937	92.158	92.7977	91.1842	92.1625	92.0105	91.4225	92.0409	92.0714	91.3379	91.675	91.6677	91.8582	91.2765	91.8558	91.8746	92.8278	92.3423	92.4959	92.0691	92.4051	92.0622	93.1523	93.1386	94.3756	100	94.3477	95.1207	95.7505	95.894	92.5327	92.7073	92.7977
42	P. weihenstephanensis	92.0409	93.813	92.4959	92.4051	92.0904	92.3098	92.1322	91.9191	92.7073	92.2233	91.9496	91.675	91.3072	91.9731	91.9168	92.221	91.9145	92.5261	91.3993	92.1018	91.4607	91.3304	91.522	91.675	91.1534	91.4607	91.6983	91.8582	91.2457	91.7948	91.3536	91.8277	92.0082	92.0714	91.9778	92.1625	91.9098	92.701	92.9881	93.813	94.3477	100	95.8789	95.4023	95.2262	91.8016	91.8887	92.0409
43	P. fragi	92.8593	94.6782	93.0403	93.1908	93.0605	93.2772	93.2209	92.5869	93.281	92.9499	92.8593	92.4959	92.344	93.0041	93.0082	92.9478	92.2787	93.3411	92.0086	92.6475	92.4959	92.0017	92.5869	92.1917	91.8557	92.1917	92.7623	92.4655	91.7945	92.3113	92.1476	93.0403	93.249	92.9197	92.827	92.8593	91.6006	93.6052	93.2918	94.6782	95.1207	95.8789	100	96.8877	96.3984	92.6849	92.98	92.8895
44	P. decepcionensis	92.7676	94.5229	92.7073	92.8278	92.5759	92.7935	92.6469	92.2839	93.0082	93.0082	92.5866	91.9496	91.9496	92.701	92.5844	92.7353	92.5218	93.2181	91.5526	92.1929	92.1929	91.6065	92.1625	92.1625	91.675	92.1322	92.3076	92.0714	91.5526	92.0691	92.2402	92.888	92.5542	92.4051	92.4332	92.5564	92.0926	93.601	93.0182	94.5229	95.7505	95.4023	96.8877	100	97.1553	92.6539	92.9181	92.9782
45	P. psychrophila	92.4029	94.4624	92.4635	92.5542	92.1489	92.5197	92.312	92.2514	92.7353	92.3423	92.3423	91.7337	91.4582	92.1231	92.0972	92.431	91.9121	92.5844	91.5808	92.2817	92.0995	91.4814	92.221	91.8253	91.3047	91.4889	91.9098	91.9473	91.3047	91.7619	92.1162	92.524	92.3705	92.1906	91.945	92.1603	92.0599	93.7184	93.4068	94.4624	95.894	95.2262	96.3984	97.1553	100	92.5306	92.7353	92.8257
46	P. arsenicoxydans	93.4723	91.8064	93.7112	93.7112	93.403	93.7673	93.9494	93.4723	94.1571	93.562	93.3226	92.8415	92.8716	93.9739	93.9774	94.0368	93.1085	94.1275	92.5089	93.1425	93.3825	92.8655	93.6515	92.7811	92.7811	93.2026	93.4367	92.9018	93.1425	93.3206	93.8216	93.9791	93.7988	93.6515	93.3506	93.8899	90.221	91.8934	91.1998	91.8064	92.5327	91.8016	92.6849	92.6539	92.5306	100	97.1497	96.8071
47	P. mandelii	93.909	91.7409	94.0571	93.8794	93.7517	94.2607	94.205	93.9979	94.2935	93.7606	93.6417	93.224	93.3734	94.2	94.1146	94.0555	93.3995	94.323	92.4117	93.2838	93.4928	93.2481	93.8497	92.9842	93.224	93.463	93.666	93.224	93.2539	93.5207	94.0766	94.3819	94.1442	94.1163	93.848	94.264	90.5014	92.2839	91.2279	91.7409	92.7073	91.8887	92.98	92.9181	92.7353	97.1497	100	97.3003
48	P. frederiksbergesis	93.7903	91.7714	94.1459	93.8497	93.573	94.1721	93.909	93.8794	94.4114	93.9683	93.9683	93.194	92.9842	94.1409	93.937	94.2328	93.5785	94.264	92.3814	93.3137	93.3137	92.9782	93.5226	93.1641	93.1341	93.2539	93.7553	93.2838	93.2838	93.5803	93.5712	94.0867	93.7886	93.7606	93.4909	93.8794	90.377	91.8582	91.2587	91.7714	92.7977	92.0409	92.8895	92.9782	92.8257	96.8071	97.3003	100
49	P. prosekii	94.0275	91.4656	94.0867	93.7903	93.6326	94.1721	93.8497	93.9387	94.205	93.82	93.82	93.1042	93.0442	93.8445	93.8776	94.085	93.7273	94.2345	92.3209	93.3734	93.5524	92.7374	93.9979	92.9542	93.3137	93.3436	93.5767	93.3436	93.3734	93.6399	93.6606	94.205	93.937	93.6715	93.4313	93.909	90.1277	91.8277	90.7643	91.4656	92.6168	91.9496	92.4959	92.9181	92.7353	96.4055	96.7599	96.9594
50	P. silesiensis	94.1704	91.5501	94.0521	93.9038	94.0436	94.5214	94.2	93.9335	94.4656	93.666	93.8147	93.4574	93.3079	94.2838	94.3461	94.287	93.8409	94.5833	92.3446	93.6065	93.6363	92.7915	93.9928	93.3976	93.4275	93.8445	93.958	93.5469	93.8445	94.0504	93.8654	94.495	94.2279	94.2	93.9614	94.2886	90.2751	92.1557	91.2819	91.5501	92.6708	92.2165	92.8833	93.0923	92.6083	96.8071	96.9284	96.8999
51	P. lini	94.1113	91.9473	94.1704	94.2296	94.0732	94.5508	94.7008	93.9335	94.8182	93.8741	94.1113	93.6363	93.4275	94.1951	94.2575	94.3165	93.6624	94.1704	92.6168	93.3677	93.4574	92.8216	94.0224	93.2181	93.1882	93.5469	93.7202	93.517	93.666	93.9021	94.3692	94.3182	94.1688	94.0224	94.1096	93.9928	90.5242	92.4289	91.4666	91.9473	92.5499	92.3379	93.0343	92.8216	92.6687	96.4055	96.5855	96.3848
52	P. migulae	93.7256	91.9168	93.5469	93.9038	93.9248	94.0783	94.1704	93.3976	94.2	93.517	93.7256	93.0682	93.0983	93.9283	94.4051	93.9021	93.2143	93.9038	92.1018	93.0682	93.1882	92.8819	93.4872	93.0983	93.2181	93.517	93.8986	93.3378	93.4574	93.6344	94.0436	93.9928	94.2279	94.2886	93.9318	94.1704	90.6484	92.6708	91.3743	91.9168	92.5802	92.3986	92.974	92.8216	92.578	96.1173	96.2987	95.8373
53	P. granadensis	91.9801	90.1277	91.7055	92.0714	92.2728	92.2491	92.3142	91.3686	92.4051	91.3072	91.8582	91.0302	90.7831	91.8511	92.2514	91.8558	91.7313	92.2839	91.2765	91.6444	91.7666	92.0949	92.4051	91.2765	91.7055	92.1018	92.6708	92.2233	92.0409	92.5542	92.3335	91.8887	91.8558	91.8887	92.2514	92.1929	89.3653	91.0224	89.8822	90.1277	91.2381	90.3091	91.0167	91.0841	90.8962	92.7207	93.0682	93.278
54	P. moraviensis	92.3446	90.1277	92.0105	92.1625	92.3942	92.4613	92.4959	91.7972	92.6771	91.7972	91.9496	91.4913	91.3686	92.5802	92.7956	92.312	92.0363	92.1625	91.2765	91.8582	92.1322	92.2469	92.4959	92.0409	91.8887	92.2233	92.7613	92.0105	92.4354	92.5844	92.0294	91.7972	91.7337	91.8277	92.0691	92.0409	89.4915	91.0224	90.1642	90.1277	90.8679	90.2468	91.1096	90.8988	90.8962	92.9921	93.0682	93.0983
55	P. koreensis	92.5261	90.5014	92.2536	92.6771	93.1484	92.7935	92.8579	92.2536	93.0983	91.8582	92.2839	91.8582	91.6138	92.3683	92.5844	92.1603	91.884	92.4354	91.4607	92.4959	92.6168	92.5197	92.7977	92.0714	92.4354	92.7073	93.2423	92.5261	92.6168	92.8859	92.6061	92.6469	92.6448	92.3748	92.7956	92.888	89.7431	91.8511	90.5387	90.5014	91.3918	90.6201	91.6953	91.5759	91.2048	93.2626	93.4872	93.4872
56	P. kribbensis	92.7655	90.6848	92.4937	92.8257	93.2365	93.0923	93.0963	92.7353	93.2462	91.8253	92.5542	91.7337	91.6726	92.578	93.0342	92.3401	91.9426	92.4937	91.8558	92.4332	92.7353	92.578	93.1862	91.9473	92.7655	92.916	93.1804	92.7655	92.7052	92.9441	92.4526	92.4332	92.431	92.7655	92.9741	92.7956	89.3938	91.5734	90.3801	90.6848	91.1432	90.3997	91.6314	91.3586	91.4483	93.1706	93.3957	93.4256
57	P. baetica	93.2481	91.0893	92.888	93.0082	93.2684	93.334	93.2481	92.5261	93.5469	92.3446	92.7977	92.1625	91.8582	92.942	93.3957	92.8558	92.5823	92.6771	92.0105	92.9481	93.2181	92.8216	92.8278	92.3446	92.4657	92.6168	93.2722	93.0983	92.6168	93.0663	92.7873	93.0082	92.7956	92.888	92.8859	92.7676	90.7104	92.2165	90.7562	91.0893	91.8206	90.9915	91.6338	91.9121	91.7571	93.5918	93.785	93.7256
58	P. helmanticensis	92.912	90.8962	92.5197	92.8517	92.8716	93.0282	93.2423	92.5802	93.4816	92.701	92.701	92.0949	91.9731	93.1464	93.3901	93.1204	92.7572	92.8819	92.2469	92.3683	92.5197	92.8757	92.7915	92.3683	92.4591	92.7312	92.9962	92.5499	92.7312	93.1204	92.7811	93.2722	93.0302	93.0322	93.0603	92.942	89.8597	91.8135	90.3744	90.8962	91.5686	90.9527	91.8108	91.9356	91.7499	94.0631	94.1951	94.3724
59	P. mohnii	93.5601	90.8182	93.1706	93.7094	93.7601	93.9144	93.4704	93.2306	93.59	93.2907	93.1105	92.6279	92.5067	93.4947	93.6479	93.5882	92.9559	93.6199	92.2639	92.8696	93.1405	92.7728	93.6199	92.5673	92.9901	93.2907	93.704	93.4105	92.8997	93.1686	93.5808	93.6796	93.5284	93.4105	93.618	93.7392	89.3371	91.4616	90.8873	90.8182	91.738	91.5846	92.3478	92.1048	91.8581	94.852	94.9518	94.7756
60	P. moorei	93.5135	91.0114	93.2432	93.6932	93.5642	93.7793	93.4535	93.2733	93.6632	93.1228	93.0323	92.3656	92.4264	93.3277	93.6315	93.5116	93.0283	93.6632	92.2742	92.851	93.1228	92.6933	93.753	92.851	93.0625	93.0926	93.4479	93.3034	92.9417	93.2413	93.2937	93.5734	93.2714	93.3034	93.3916	93.6034	89.7202	91.5933	90.8321	91.0114	91.9311	91.6548	92.3323	92.3589	92.2347	94.543	94.9389	94.6146
61	P. reinekei	93.5152	91.5783	93.2162	93.694	93.7744	93.8095	93.3658	92.8558	93.8427	93.2162	93.0362	92.5844	92.3727	93.3003	93.5432	93.4237	92.7312	93.8724	92.312	92.7956	92.9762	92.8497	93.8724	92.7052	93.2162	93.1862	93.9266	93.3359	93.694	93.9894	93.9528	93.6344	93.573	93.4555	93.4835	93.7238	90.2723	92.0622	91.0659	91.5783	91.9098	91.8182	92.6694	92.6083	92.4548	95.0397	95.3136	94.9047
62	P. umsongensis	93.7256	91.5501	93.4275	93.517	93.8654	94.3444	94.1704	93.4275	93.9928	93.0983	93.6065	93.0682	92.5866	93.601	94.0504	93.5152	93.2442	93.9038	92.2839	93.1282	93.3677	92.8517	93.6065	92.7977	93.0082	93.0983	93.5115	93.3378	93.0382	93.4555	93.4181	93.6958	93.7535	93.6065	93.5748	93.7256	89.8686	92.2165	91.1277	91.5501	92.0036	91.79	92.3982	92.3076	91.9708	95.0412	95.4023	95.1692
63	P. vancouverensis	93.1282	91.2124	93.1582	93.1882	93.5973	93.5133	93.4574	93.0682	93.6958	92.3748	92.7977	92.3142	91.9191	93.1523	93.6046	93.3658	92.6125	93.278	91.7055	92.4354	92.6469	92.6708	93.2481	92.1929	92.7073	92.8278	93.3321	92.9782	92.7073	93.0663	93.5078	93.3677	92.9461	93.0983	93.1862	93.1582	89.9	91.9426	90.4141	91.2124	91.8816	91.6371	92.2764	92.0036	92.0317	94.512	94.5245	94.2591
64	P. laurylsulfatovorans	93.5469	91.0584	93.3677	93.517	93.5078	94.0487	93.666	93.0082	93.7553	93.1882	93.0983	92.4657	92.2233	93.3321	93.6344	93.306	92.8538	93.4275	91.7972	92.4354	92.6469	92.1861	93.4872	92.7374	92.8579	93.0682	93.5115	93.4275	92.7676	92.8257	92.938	93.2481	93.2761	93.0082	93.0362	93.278	89.586	91.7595	90.7252	91.0584	91.9121	91.4839	92.2155	92.2773	91.7265	94.6888	95.0231	94.7008
65	P. jessenii	93.6868	91.6299	93.3582	93.8654	93.8864	94.3955	94.1029	93.6272	94.2509	93.1784	93.7464	92.938	92.938	93.7708	93.9528	93.8637	93.3544	93.7762	92.6061	93.1784	93.3882	92.8415	93.9842	93.0883	93.3882	93.5376	93.8601	93.6272	93.5376	93.7446	93.9756	93.7166	93.5059	93.5078	93.4162	93.5376	89.9165	92.1748	90.9909	91.6299	92.4179	91.5637	92.5698	92.4483	92.2335	95.1807	95.454	95.1916
66	P. laurylsulfatiphila	93.6958	91.6114	93.7553	93.9928	93.5376	94.2263	94.1113	93.4574	94.3772	93.4275	93.517	92.8278	92.7374	94.1359	94.287	94.1096	93.2143	93.9632	92.5261	93.1882	93.5469	92.701	93.8741	93.0983	92.8579	93.3378	93.5712	93.1282	92.888	93.0663	93.5973	93.9928	93.4853	93.6065	93.3359	93.4574	90.2127	92.034	91.035	91.6114	92.2165	91.5452	92.5805	92.2773	92.0013	95.2459	95.1984	95.1692
67	P. brassicacearum subsp. brassicaceatum	93.3957	90.9015	93.0963	93.2761	93.1765	93.392	93.4256	92.5542	93.6642	92.6146	93.0362	92.5542	92.2817	93.42	93.4237	93.0643	92.8517	93.5748	92.2817	92.916	93.1563	92.4873	93.2761	92.524	92.4937	92.7353	93.2703	92.8859	92.4332	93.0943	92.6947	93.1862	92.8538	93.0663	93.0643	92.7956	89.5199	91.2663	90.6292	90.9015	91.7877	91.2663	92.5783	92.0926	91.938	93.9476	93.9614	94.287
68	P. kilonensis	94.0224	91.3047	93.6363	93.666	93.4181	93.9894	93.9038	93.0382	94.2	93.0682	93.5767	92.7676	92.5866	93.7797	93.8427	93.6344	93.3938	93.8741	92.6771	93.3378	93.6958	92.9721	93.785	92.7374	92.7676	93.1282	93.601	93.3677	92.9481	93.4853	92.9681	93.3976	93.306	93.3976	93.3359	93.3378	89.9	91.6065	90.8802	91.3047	92.3076	91.6677	92.7321	92.5499	92.4873	94.7476	94.6715	94.6715
69	P. thivervalensis	93.3359	90.8396	93.1862	93.3957	93.1464	93.6308	93.4555	92.5844	93.6642	92.675	93.0062	92.7956	92.524	93.3601	93.6028	93.0943	92.9721	93.2761	92.3423	93.2162	93.5152	92.6687	93.3957	92.675	92.4937	92.7956	93.6588	93.2761	92.6146	93.0943	92.9661	93.4256	93.5133	93.2761	93.3938	93.3359	89.4253	91.2663	90.6603	90.8396	91.6653	91.4814	92.4568	92.1535	91.9685	94.0071	93.9021	93.9911
70	P. corrugata	92.9461	90.3742	92.9461	92.9461	92.5132	93.2423	92.9762	91.8558	93.0062	91.9168	92.3727	91.9473	91.8253	92.7291	92.7935	92.7031	92.5802	92.916	91.7337	92.8558	92.7956	92.0926	93.0062	91.9168	91.9473	92.1906	92.2447	92.3727	91.7948	92.2491	91.6911	92.312	92.3705	92.4029	92.0972	91.8558	88.6644	90.3686	89.7535	90.3742	91.1432	90.6484	91.6006	90.958	90.9554	93.2607	93.0362	93.2162
71	P. mediterranea	93.2181	90.7185	92.9481	92.7977	92.6061	93.3938	92.888	92.1018	92.9782	92.1018	92.4354	92.0105	91.8277	93.0623	92.8558	92.9461	92.4613	92.8579	91.9191	92.7977	92.9181	92.0645	93.1582	92.1625	92.1018	92.4959	92.4591	92.4354	92.0105	92.4029	91.6629	92.2233	92.3423	92.2536	92.2514	92.2233	88.4764	90.2468	89.8822	90.7185	91.1149	90.4337	91.4492	91.0532	91.0506	92.9921	93.1282	93.4574
72	P. protegens	92.4959	91.1201	92.7374	92.5564	92.5759	93.0643	93.1282	92.0409	92.8278	92.0409	92.4959	91.7055	91.4913	92.5499	92.524	92.5542	91.9754	92.2839	91.4913	92.0105	92.0409	91.3304	92.7676	91.6138	91.3993	91.522	92.3379	91.9191	91.9191	92.221	91.8769	92.4051	92.3423	92.1018	92.0386	91.8582	89.3022	91.2996	90.1955	91.1201	91.4839	90.6201	91.9099	91.2381	91.1432	92.9018	93.0983	93.0382
73	P. saponiphila	91.8511	90.6794	91.9121	91.8511	91.7781	92.2424	92.4894	91.2073	92.1253	91.4839	91.8816	91.2381	91.0532	91.8135	91.8182	91.6347	91.2356	91.6065	90.6201	91.5759	91.5452	90.8599	91.6677	90.7751	91.0224	91.1457	91.6299	91.2381	91.4839	91.7877	91.2562	91.8206	91.9403	91.5759	91.6653	91.3918	89.1028	90.4564	89.8418	90.6794	90.6429	90.0194	91.1018	90.4253	90.2666	92.2594	92.4894	92.3379
74	P. chlororaphis subsp. aurantiaca	92.6469	90.6255	92.6168	92.4959	92.6968	92.914	93.1582	92.1018	92.9481	92.3142	92.4959	92.1625	92.1929	93.0623	92.916	92.675	92.5521	92.4354	92.3142	93.3378	93.3976	92.5197	93.1282	92.0409	91.9191	91.7972	92.5499	92.3446	92.2536	92.312	92.3032	92.8278	93.0663	92.4354	92.675	92.2839	89.6489	91.2996	90.133	90.6255	91.0532	90.558	91.818	91.1457	90.8962	93.0824	93.1582	93.4872
75	P. chlororaphis subsp. aureofaciens	92.7073	90.6875	92.7374	92.6771	92.8476	93.0643	93.1282	92.1322	92.9782	92.1625	92.5261	92.2233	92.1018	93.0322	92.9461	92.7052	92.431	92.6168	92.2536	93.4872	93.4275	92.5802	93.0983	92.0714	91.8582	92.0105	92.6708	92.2233	92.4959	92.6448	92.4548	92.9782	92.916	92.6168	92.7353	92.4354	89.6489	91.4839	90.4764	90.6875	91.2381	90.6511	91.818	91.2689	91.1123	93.1425	93.278	93.6363
76	P. chlororaphis subsp. chlororaphis	92.6104	90.8033	92.5499	92.4591	92.5089	93.0583	93.0022	92.1253	92.8517	92.1861	92.4289	91.9121	92.0645	93.0262	92.8497	92.9099	92.3032	92.3986	92.2773	93.2423	93.0923	92.3313	92.912	92.0949	92.1253	92.0645	92.3313	92.1861	92.2773	92.3964	92.4483	92.8216	93.0002	92.4894	92.7894	92.4591	89.1978	90.9836	90.2807	90.8033	90.8599	90.3006	91.5034	91.0763	90.7953	93.0764	93.1823	93.4816
77	P. chlororaphis subsp. piscium	92.888	90.5014	92.9181	92.7073	92.9079	93.3041	93.4574	92.3142	93.0983	92.1322	92.4657	92.1322	92.0105	93.1523	93.1563	92.8558	92.5218	92.7977	92.3748	93.5767	93.5469	92.5802	93.0682	92.1625	91.9191	92.1929	92.6406	92.2233	92.4051	92.5542	92.3942	93.0082	93.0062	92.4657	92.675	92.5261	89.6489	91.3304	90.258	90.5014	91.3611	90.6201	91.8486	91.3918	91.0815	93.3825	93.4275	93.785
78	P. batumici	92.8579	90.0652	92.6469	92.5564	93.3882	93.334	93.3378	92.2536	93.0382	91.7055	92.2233	92.0105	91.7361	92.7915	93.1263	92.675	92.6729	93.278	91.1227	92.8579	92.9481	92.3683	93.0382	91.7055	91.9191	92.4959	93.601	93.1882	92.4051	92.7655	92.1816	93.0382	92.7956	92.4657	93.0963	92.7374	88.5083	90.589	90.039	90.0652	90.6821	90.278	91.3876	90.8988	90.7724	92.5392	92.7073	93.1582
79	P. agarici	91.0584	89.1505	90.8423	91.0893	90.9527	91.6983	91.2432	90.4392	91.274	90.377	90.8114	90.377	90.3459	90.9271	91.0558	90.7158	90.7751	91.3354	90.034	90.8423	90.6875	90.2439	91.2124	90.4392	90.3459	90.3459	90.6173	90.8114	90.3148	90.4675	90.2382	90.9041	90.6228	91.1201	90.7468	90.3459	87.3139	89.239	88.6762	89.1505	89.4915	89.0807	89.5429	89.4284	89.4884	91.192	91.0893	91.274
80	P. asplenii	91.2099	89.6833	91.0558	91.4864	91.1971	91.7571	91.6396	90.3742	91.5477	90.6228	91.3329	90.2184	90.4675	91.1149	91.1149	91.2073	90.3997	90.8396	89.7805	91.0867	91.2099	90.9244	91.3329	90.5297	90.156	90.4675	91.1714	90.9015	90.6848	91.2689	89.9851	90.6228	90.837	90.7777	90.6511	90.4364	87.8598	89.6458	89.6936	89.6833	90.2411	89.5514	90.7318	89.9284	90.1445	90.6941	91.025	91.2407
81	P. fuscovaginae	91.0584	89.5921	90.9659	91.4275	91.1997	91.6677	91.6114	90.5324	91.5501	90.5635	91.3047	90.0965	90.4081	90.9271	90.9324	91.0558	90.278	90.6875	89.6894	91.0276	91.2124	90.8343	91.3354	90.4081	90.1901	90.4703	91.0815	90.8732	90.5945	91.0867	90.1758	90.6565	90.6538	90.7495	90.4675	90.2525	87.8634	89.6489	89.6905	89.5921	90.2127	89.523	90.6412	89.8686	90.0849	90.8519	91.1509	91.2124
82	P. abietaeniphila	89.8313	88.9222	89.6113	89.8627	89.6275	89.8254	90.0194	89.4222	90.0194	89.5798	89.9254	89.201	89.3591	89.5076	89.3875	89.5137	89.9509	89.4538	89.2959	89.7057	89.3591	89.3813	89.8313	89.5168	89.1377	89.7057	89.7969	89.2643	88.7884	89.1978	89.0232	89.4222	89.8911	89.3591	89.5137	89.5483	87.4248	88.7147	88.6913	88.9222	89.6966	88.9694	89.4641	89.3813	89.5676	89.8329	90.1133	90.3318
83	P. bohemica	89.4222	88.06	89.5483	89.5168	89.5645	89.6052	89.3275	89.0109	89.8941	89.106	89.2959	88.3096	88.8838	89.0011	88.9123	89.1028	88.9409	88.5653	88.2455	88.6929	88.9791	89.0963	89.1693	88.5973	88.9474	89.0109	89.6052	88.8521	88.4376	88.7214	88.417	88.9156	89.1345	89.1693	89.3243	88.9156	86.9692	87.9457	87.8236	88.06	88.7466	88.2029	88.2825	88.0744	88.1673	89.4226	89.6428	89.5798
84	P. graminis	89.9568	88.6359	90.0507	89.4538	89.7535	89.8881	89.5798	89.3591	89.8313	88.8521	89.4222	89.0426	89.2643	89.476	89.2611	89.3559	89.2579	89.1377	88.4056	88.8521	89.2326	89.2231	90.1758	88.9474	88.9791	89.2643	89.5798	89.4538	88.5973	89.0076	89.719	89.5483	89.4191	89.5168	89.2295	89.201	87.1973	88.5232	88.0818	88.6359	89.1914	88.4593	89.3373	88.9376	89.1883	89.8643	89.7371	89.7057
85	P. lutea	88.7466	88.0493	88.9058	88.4912	88.8256	88.8992	88.5232	88.1708	88.5552	88.0101	88.8103	87.849	87.9135	88.6089	88.6476	88.4558	88.3243	88.1708	87.461	87.9779	88.3953	87.8058	89.0329	87.9457	88.0101	87.8812	88.5552	88.5552	87.849	88.103	88.5668	89.0646	88.6476	88.4593	88.6476	88.5871	86.4987	88.1924	87.4234	88.0493	88.3529	87.7412	88.4972	88.545	88.4776	88.9685	88.874	88.651
86	P. caspiana	89.9431	89.4156	90.2242	89.7865	89.4569	90.156	89.7865	89.661	90.2553	90.3487	89.9431	89.3778	89.8805	89.8716	89.5951	89.9089	89.8432	90.0994	89.2201	89.4094	89.5667	89.8403	90.2242	88.9352	89.1252	89.2201	89.7147	89.5667	89.3463	89.5951	89.9881	90.0057	89.7835	89.7552	89.5951	89.3148	88.2845	89.6833	89.4098	89.4156	89.7461	89.6519	90.0813	90.0594	90.1503	90.5981	90.6283	90.3176
87	P. cichorii	89.2137	88.0742	89.0238	88.7063	89.4507	89.2706	88.8652	88.9921	89.1821	88.5789	88.6744	88.4512	88.3554	89.3053	88.9572	89.084	88.4764	89.2769	88.6744	89.2137	88.7699	88.5687	89.2453	88.4832	88.6426	88.8652	89.4253	88.5789	88.8017	88.8937	88.8136	89.0238	89.0206	88.8335	88.7666	89.1505	86.9196	88.7281	87.9421	88.0742	88.5368	87.5406	88.3607	88.1848	88.3096	89.5583	89.5921	89.6549
88	P. asturiensis	89.2453	88.5537	88.897	88.5789	88.9759	89.2706	89.1505	88.4832	89.4031	88.4832	88.8652	88.6107	88.7381	88.7917	88.5755	88.8302	89.0174	89.2137	87.8421	88.5789	88.5789	88.5049	89.1821	88.4193	88.1312	88.3874	88.281	88.1312	88.3234	88.5755	88.3667	89.0238	88.5436	88.2594	88.0635	88.2914	87.2776	88.441	88.9914	88.5537	89.1409	88.8236	89.1912	89.0141	89.0743	89.2421	89.0238	89.4031
89	P. viridiflava	89.7238	89.1948	89.9744	89.6296	89.5829	90.0311	89.661	89.2832	90.0369	89.0936	89.5038	89.4094	89.3148	89.1156	89.2169	89.5637	89.5921	89.9431	88.5856	89.1569	89.3778	89.3369	90.3487	88.9986	88.84	88.7765	89.589	89.5982	88.8083	89.1853	89.0743	89.661	89.5322	89.3778	89.3432	89.062	88.1242	89.3369	88.9025	89.1948	89.589	89.4631	89.6092	89.6205	89.6174	89.7535	89.4094	89.5038
90	P. floridensis	88.9352	87.76	88.9986	88.6175	88.8871	89.2137	88.6811	88.4262	89.4094	88.7129	88.7765	88.9986	88.9352	88.8937	88.5504	88.7732	88.7381	89.1885	88.4581	88.7447	88.49	88.6074	89.5982	88.6493	88.3942	88.4581	88.9254	88.6175	88.49	88.7096	87.7308	88.5856	88.2949	88.1703	87.9422	88.2664	87.0903	88.5436	88.2636	87.76	88.7348	88.3199	88.7199	88.1919	88.3485	89.2168	89.2201	89.3148
91	P. cannabina	89.8716	89.2485	89.7147	89.6205	90.0762	90.0223	89.9969	89.7147	90.4337	89.6519	89.7147	89.9656	89.9656	89.8313	89.9939	89.7431	89.5514	90.3091	89.1156	89.6519	89.5261	89.2959	90.0907	89.5575	89.5261	89.589	89.8313	89.4316	89.4	89.3969	89.6966	90.0282	89.46	89.5261	89.5545	89.2422	88.6577	89.1377	89.2738	89.2485	89.8313	89.5798	89.7894	89.5483	89.6397	90.3716	90.589	90.4648
92	P. avellanae	89.5353	88.5924	89.7552	89.5667	89.8657	89.9685	89.7552	89.7865	90.0682	89.1885	89.5667	89.4724	89.6296	89.4631	89.1537	89.5951	89.2453	89.7552	88.5537	89.1252	89.2201	88.7348	90.0369	89.2832	89.2832	89.3778	89.2105	89.3463	89.0936	89.2485	89.1377	89.7238	89.2801	89.2517	89.1853	89.0936	87.5444	88.9254	88.8707	88.5924	89.5575	88.9889	89.7039	89.4946	89.5545	90.2239	90.5352	90.193
93	P. coronafaciens	89.3369	88.932	89.7775	89.3369	89.2579	89.3306	89.5261	89.1473	89.4946	89.084	89.2422	89.2738	89.084	89.3591	89.2706	89.2706	89.0141	89.3685	88.4798	89.0206	88.8302	88.4056	89.4946	89.1789	88.7666	88.7348	89.0109	89.1789	88.7666	89.0174	88.5871	89.2738	88.8269	89.3053	89.1124	88.9254	87.6626	88.5653	88.8927	88.932	89.9568	89.3275	89.2516	89.2643	89.5768	89.112	89.5575	89.7147
94	P. congelans	89.7865	88.9734	90.193	89.2201	89.3938	89.9685	89.6924	89.2517	89.8179	89.4409	89.6296	89.8805	89.5353	89.4946	89.0904	89.658	89.6235	90.0994	88.6175	89.0303	89.0936	89.084	90.2553	89.7865	89.3148	89.3148	89.6205	89.5353	89.4724	89.7208	89.106	89.5353	89.3747	89.5038	89.5007	89.0303	87.8026	88.5755	88.8389	88.9734	89.8403	89.4	89.9871	89.8403	89.9	89.596	89.7865	90.0057
95	P. syringae subsp. syringae	89.7865	88.9734	90.193	89.4094	89.5514	90.156	89.9744	89.4724	90.0369	89.5038	89.8805	89.7865	89.6924	89.6519	89.2801	89.8462	89.7805	90.2553	88.9035	89.4094	89.3778	89.1473	90.4109	89.9744	89.3463	89.1252	89.903	89.6924	89.7238	89.9715	89.106	89.661	89.5322	89.6296	89.658	89.1885	87.9314	88.8619	88.807	88.9734	89.8403	89.4	89.9557	89.7147	89.8373	89.4698	89.9118	90.1618
96	P. cerasi	90.0369	88.7831	90.1618	89.661	89.8029	90.3742	89.9118	89.5982	90.0369	89.5667	89.8805	89.8492	89.7552	89.4631	89.2169	89.5951	89.6549	90.0057	88.6175	89.5353	89.5353	89.4316	90.6902	89.8179	89.2832	89.5982	89.7461	89.7865	89.5982	89.7522	88.9791	89.661	89.4062	89.8492	89.7835	89.3463	88.1563	88.7984	88.7752	88.7831	89.9656	89.2105	90.0185	89.8089	89.7745	89.5645	90.1618	90.0057
97	P. caricapapayae	90.0994	88.7196	90.3798	89.5982	89.8029	90.0623	89.5982	89.6924	90.0057	89.5982	89.7238	89.7865	89.5982	89.5575	89.3747	89.5007	89.6549	90.0994	88.7765	89.3463	89.0936	89.3053	90.5042	89.4724	89.8492	89.8179	89.8716	89.5982	89.5667	89.8149	88.8521	89.5982	89.0904	89.4094	89.5007	89.1252	87.8348	88.9572	88.8389	88.7196	90.0594	89.1473	89.9871	89.7461	89.7745	89.7849	90.1306	90.3176
98	P. amygdali	89.7865	88.4968	90.1306	89.7552	89.6144	89.9685	89.6296	89.661	89.9431	89.661	89.9118	89.5353	89.4409	89.4316	89.3116	89.658	89.5291	89.9744	88.3303	89.5353	89.3148	89.4316	90.3798	89.6296	89.2201	89.661	89.7147	89.5667	89.3778	89.5637	89.106	89.3148	89.2485	89.5353	89.4378	89.5038	87.7059	88.3839	88.8389	88.4968	89.903	89.1473	89.6092	89.5575	89.6174	89.596	89.8492	89.8492
99	P. tremae	89.9744	88.8149	90.4731	89.8805	89.8657	90.312	89.8805	89.7865	90.0994	89.8179	90.0057	89.7865	89.6924	89.7775	89.5951	89.9089	89.7805	90.3487	88.5856	89.8179	89.6924	89.5575	90.6593	89.9431	89.5667	89.9431	89.9343	89.7865	89.4724	89.6894	89.2959	89.5353	89.4693	89.6924	89.5951	89.7238	87.8348	88.6392	89.0296	88.8149	89.9343	89.2738	89.7984	89.6833	89.7431	90.0047	90.2553	90.1618
100	P. ficuserectae	90.0507	89.1757	90.363	89.7999	89.8792	90.2013	89.6113	89.6113	90.207	89.7371	89.8313	89.6742	89.8941	89.7341	89.2927	89.7341	89.7939	90.1133	88.5973	89.5483	89.5168	89.3181	90.1445	89.7999	89.2959	89.6742	89.6651	89.3275	89.2959	89.4507	89.0549	89.4222	89.3243	89.5483	89.3559	89.3275	87.9099	88.651	89.112	89.1757	89.6021	89.1598	89.4958	89.6651	89.7565	89.7354	89.8313	89.8941
101	P. meliae	89.7492	88.4581	90.1873	89.5291	89.5137	90.2439	89.6235	89.6864	89.9372	89.4977	89.8746	89.7492	89.8432	89.589	89.3053	89.7147	89.8686	90.0936	88.3874	89.3085	89.4977	89.5829	90.2184	89.8119	89.4031	89.6235	89.5514	89.34	89.2453	89.2738	89.0044	89.3085	89.1789	89.4662	89.3053	89.4662	87.6016	88.5049	88.7114	88.4581	89.6144	88.9824	89.6347	89.4569	89.6113	89.6845	89.9998	89.9998
102	P. syringae subsp. savastanoi	89.8746	88.9986	90.312	90.0936	89.9225	90.5242	89.7805	89.8119	90.2808	89.9059	90.0311	89.9685	89.9998	89.9656	89.5575	90.1219	89.8373	90.312	88.7063	89.4977	89.9059	89.7087	90.3742	89.9998	89.5291	89.8746	89.8029	89.4977	89.4662	89.5575	89.2263	89.5921	89.5261	89.7178	89.5261	89.6864	87.7308	88.6962	88.6795	88.9986	89.4569	89.1409	89.7293	89.5829	89.6742	90.0616	90.1248	90.0936
103	P. turukhanskensis	86.8779	86.2643	87.3328	87.3328	87.6699	87.3252	87.3975	86.6821	86.8127	86.8453	86.8453	86.584	86.6167	86.9313	87.4908	87.0368	86.7395	87.4622	85.7946	86.4202	86.943	86.8987	87.3328	86.0257	87.0407	87.3975	87.9993	87.4299	86.5513	87.0368	87.6663	87.3975	87.8135	87.6238	88.2309	87.8171	85.3458	86.7028	85.5524	86.2643	86.8661	86.5719	87.1052	86.6047	86.8295	87.421	87.5592	87.4946
104	P. coleopterorum	88.53	87.5083	88.53	88.6896	88.3529	89.0646	88.9759	87.6303	88.7851	88.4981	88.562	88.4341	88.7214	88.4558	88.6862	88.6224	88.1387	88.6896	87.7595	87.8884	88.2099	88.0387	88.7851	88.3061	88.6896	88.9441	88.874	88.6896	88.3381	88.4947	88.3494	88.53	88.75	88.6896	88.4307	88.274	85.7142	87.4248	86.6468	87.5083	87.8454	86.8712	87.372	87.3599	87.161	88.624	88.8806	88.6258
105	P. rhizosphaerae	88.5586	87.3101	88.6224	88.7181	88.4776	88.7752	88.7818	87.9171	88.75	88.4947	88.4947	88.1743	88.4627	88.4204	88.5232	88.3632	88.3918	88.5586	87.3999	87.7558	88.0458	87.9707	88.5905	88.1422	88.0458	88.5586	88.807	88.8136	88.4307	88.8422	87.6044	88.4627	88.4912	88.4307	88.4273	88.0779	85.5103	87.1935	86.9052	87.3101	87.7449	87.3236	87.4985	87.2911	87.4173	88.5246	88.9091	88.6862
106	P. japonica	88.4764	86.7068	88.3805	88.7314	88.651	88.9474	88.5721	88.1563	88.5402	87.867	88.1884	87.7381	87.7381	88.3701	88.7281	88.1848	87.6663	88.5402	86.8622	87.8026	88.1884	87.7595	88.2204	87.7381	88.0921	88.3805	88.7214	87.7704	88.1242	88.409	87.8131	88.4444	88.249	87.9314	88.1848	87.7381	84.7926	86.6869	86.7244	86.7068	87.0135	86.4573	87.546	86.8177	86.977	88.0531	88.2845	88.2845
107	P. qingdaonensis	89.2169	87.4013	89.4062	89.0904	89.0743	89.5261	89.2485	88.7096	88.932	87.9422	88.4227	88.2949	88.1989	88.9222	89.3716	88.6744	88.4478	88.9954	87.6846	88.4227	88.5185	87.9957	88.8685	88.0385	88.2949	88.7414	88.8904	88.6778	88.5504	89.0555	88.4021	88.4227	88.547	88.6141	88.4512	88.1348	86.0046	87.5444	86.9979	87.4013	87.8992	87.609	88.3321	87.867	87.799	88.417	89.0904	88.7732
108	P. donghuensis	88.3805	86.7721	88.3805	88.6359	88.3632	89.0426	89.0807	88.5083	88.7632	88.3805	88.3165	88.1563	87.867	88.6577	88.441	88.409	88.3096	88.5402	87.2528	88.06	88.1884	87.824	88.2204	88.3165	87.6413	88.1884	88.274	87.8992	88.1242	88.6962	87.3923	87.7059	87.6053	87.6413	87.6376	87.6736	85.4613	86.5558	87.182	86.7721	87.5332	87.1112	87.546	87.3063	87.4647	88.1818	88.1563	88.4764
109	P. wadenswillerensis	88.4444	87.0654	88.5083	88.6996	88.1066	88.8521	88.9539	88.2845	88.7314	88.0279	88.1563	87.8992	87.7704	88.5939	88.5049	88.441	88.1171	88.2204	87.0252	87.7059	87.7381	87.7272	88.3805	88.0279	87.609	88.2845	88.0493	87.867	88.0279	88.5368	87.4896	87.7059	87.5083	87.4473	87.6053	87.4797	85.7603	86.883	87.1494	87.0654	87.3387	87.0787	87.546	87.3063	87.2375	88.3104	88.4444	88.3485
110	P. vranovensis	88.2309	86.8166	88.3269	88.5185	87.892	88.3199	88.7096	87.8457	88.3908	88.0385	87.9743	87.5555	87.8457	88.3805	88.5151	88.2594	88.0956	88.5822	87.1668	87.6201	87.9422	87.1878	88.1989	87.6201	87.329	87.8457	87.8026	87.8457	87.7813	88.3874	87.0787	87.7168	87.8099	87.8135	87.6164	87.7168	85.2414	86.8622	87.0632	86.8166	87.4149	86.7642	87.297	87.3501	87.3463	88.2887	88.6141	88.6459
111	P. alkylphenolica	87.799	86.2108	87.8312	88.0886	87.3274	88.0815	87.8312	87.5083	87.9278	87.4111	87.3139	87.1189	86.9887	87.7881	87.6986	87.6663	87.4685	87.6699	87.1189	87.1515	87.6376	87.0748	87.8956	87.184	87.2489	87.5083	87.1725	86.5639	87.0864	87.3101	86.9979	87.2165	87.3425	87.4435	87.3101	87.0213	85.2235	86.4861	86.8188	86.2108	87.0422	86.5518	86.9222	86.781	86.8425	87.8236	87.8956	88.0243
112	P. reidholzensis	87.91	86.0299	87.7813	87.8779	87.7631	87.9028	88.0706	87.6201	87.5232	86.9066	87.4585	87.0693	86.9717	87.7704	87.9386	87.5195	86.7682	87.6846	86.4489	87.6201	87.5555	87.5444	87.4908	87.4908	87.0368	86.9717	87.8992	87.3938	87.1993	87.4871	87.2413	87.4908	87.6487	87.7491	87.6487	87.5232	84.8736	86.7642	86.0454	86.0299	86.8948	86.3382	86.9706	86.5679	86.367	87.2873	87.5555	87.3938
113	P. cremoricolorata	86.6374	85.3879	86.5064	86.408	86.8791	87.184	86.6047	86.1779	86.6374	85.6824	85.7817	85.914	85.7817	86.5926	86.7642	86.2396	85.6074	86.079	85.3835	86.3423	86.3095	86.5926	87.029	85.6161	85.5497	86.3095	86.5598	86.1449	85.5165	85.7443	85.7228	86.6374	86.4695	86.2766	86.3382	86.112	83.9532	85.5034	85.0046	85.3879	85.7689	85.0364	86.14	85.2703	85.6319	86.0659	86.3752	85.914
114	P. fulva	86.0869	84.9314	86.0869	86.0539	86.363	86.4082	86.0539	85.6564	85.9547	85.5567	85.0898	85.4902	85.4902	85.7099	85.7848	85.4192	85.5147	85.9216	85.2235	85.59	85.7228	86.2723	86.4821	85.8885	86.2188	86.4821	86.8673	86.4821	86.2847	86.3465	85.2634	86.2188	86.3794	86.0208	86.6421	86.2188	83.4801	85.21	85.0779	84.9314	85.21	84.6058	85.8157	85.1097	85.2055	85.8126	85.6896	85.6232
115	P. parafulva	86.2725	85.1547	86.4039	86.3382	86.7444	86.527	86.3053	85.7112	85.9758	85.5785	85.2125	85.4124	85.5121	85.7314	85.8394	85.6074	85.2703	85.5785	84.9451	85.6781	86.2396	86.0292	86.5679	85.8106	86.2725	86.5679	86.3957	86.0748	86.1078	86.3012	85.5191	85.9098	85.9716	85.8767	86.1696	86.3382	83.7443	85.6983	84.7985	85.1547	85.5322	84.8644	86.0032	85.4657	85.2279	85.8008	86.1408	86.0419
116	P. guariconensis	86.4367	84.9208	86.4408	86.4039	86.7444	86.8869	86.5351	85.6781	86.6006	85.5785	86.1737	85.7775	85.6781	86.293	86.3998	86.0377	86.2313	86.6006	84.9116	86.1737	85.9428	86.1612	86.6661	85.6781	85.6781	85.8436	86.8504	86.3382	86.1737	86.3012	85.3525	86.3711	86.5639	86.3711	86.3341	86.1737	83.8804	85.199	85.2345	84.9208	85.7977	84.8644	85.7707	85.1322	85.1611	85.8629	86.3382	86.4367
117	P. mosselii	87.0693	85.3679	87.329	87.3938	87.3101	87.8385	87.5555	86.9717	87.2966	86.4161	86.8087	86.58	86.1533	86.8948	87.0654	86.7721	86.6374	87.2642	85.691	87.0043	87.2642	87.0903	87.2642	86.874	86.874	87.0693	87.512	86.9391	86.6781	86.87	86.1283	87.1668	87.4548	87.1993	87.2928	87.1343	84.0647	85.9758	85.5813	85.3679	85.9758	85.3791	86.6428	85.7112	85.74	86.7652	86.8413	86.9066
118	P. soli	86.6781	85.0681	86.6127	86.9391	87.05	87.029	86.8087	86.4489	86.8087	85.8234	86.0545	86.1862	85.9225	86.4039	86.4777	86.0503	85.7486	86.4489	85.5584	86.5472	86.8087	86.8295	86.6454	86.4489	86.7108	86.7761	87.1228	86.7434	86.6781	86.87	86.0953	86.7108	86.9352	86.6454	87.098	86.9391	83.9969	85.2458	85.0472	85.0681	85.3458	84.9116	86.0159	85.2792	85.1746	86.2394	86.6454	86.4161
119	P. entomophila	87.3463	85.3169	87.2165	87.1515	87.0997	87.6303	87.4435	86.7602	87.3463	86.1036	86.5311	86.5311	86.3998	87.2375	87.4722	87.05	86.6214	87.3787	86.3012	87.184	87.0538	87.2375	87.2489	86.5311	86.3998	87.2489	86.9117	87.0538	86.9561	87.2451	86.2105	86.9561	87.2776	87.1515	87.1476	86.7929	84.1809	85.9259	85.8297	85.3169	85.7271	85.2947	86.2639	85.328	85.357	86.7165	86.9235	86.7602
120	P. taiwanensis	86.0173	84.729	86.2478	86.0832	86.1612	86.5351	86.1491	85.5872	86.0503	85.786	85.5872	85.6536	85.2881	85.6406	85.8479	85.3169	85.3791	86.0832	85.088	85.5209	86.0173	85.6737	85.9843	85.6867	85.9843	85.8191	86.7602	86.0173	85.8191	85.9801	85.5278	86.0503	86.2108	85.8852	85.9801	85.8852	83.7882	85.0075	85.21	84.729	85.041	84.6386	85.7128	85.1078	85.2369	86.037	86.4449	86.4777
121	P. hunanensis	86.9717	85.2681	86.4161	86.8413	87.0174	87.451	86.6454	86.1533	86.6781	85.9555	86.1862	85.9885	85.7241	86.6006	86.7721	86.3136	85.6492	86.7434	85.6579	86.874	86.58	86.4367	86.7434	86.4817	86.1862	86.4489	86.7642	86.2848	86.58	86.9026	86.4245	86.4817	86.9678	86.58	86.4777	86.3177	84.4365	85.9098	85.88	85.2681	85.4456	85.3791	86.4454	85.4124	85.6737	86.7979	87.0693	86.6781
122	P. plecoglossida	86.9066	85.4676	86.7434	86.9066	86.8869	87.3863	87.3614	86.5472	87.1993	86.1203	86.4817	86.2191	86.2848	86.6334	86.7721	86.5759	86.4408	86.7761	85.7241	87.1343	87.1018	86.7315	86.8087	86.5145	86.4817	86.6781	86.6334	86.6454	86.6781	87.0329	85.7977	86.6127	86.9678	86.7761	86.87	86.7761	84.0986	85.6781	85.8469	85.4676	85.7443	85.2792	86.3135	85.6117	85.6737	86.6012	86.5145	86.6127
123	P. putida	86.9717	86.0299	87.4261	87.6201	87.2126	87.8385	87.2966	86.7108	87.4261	86.6127	86.874	86.2191	86.4489	87.2203	87.098	86.8374	86.4736	87.1343	86.0545	86.8413	87.329	87.0903	87.0043	86.7108	86.6781	87.0368	87.4797	86.8413	86.58	87.0004	86.3259	86.6454	87.0004	86.874	86.9352	86.7761	84.2002	85.7443	86.1775	86.0299	86.6661	85.7112	87.0033	86.4695	86.0707	87.0593	87.4908	87.2642
124	P. monteilii	86.7434	85.534	86.6781	86.874	87.0174	87.4834	86.7108	86.3177	87.0043	85.8895	86.3505	85.9555	85.8895	86.4367	86.6414	86.2478	85.881	86.8087	85.691	86.6454	86.9391	86.6334	86.7761	86.1533	86.252	86.4489	86.6334	86.5145	86.1533	86.5759	85.5655	86.4817	86.6087	86.5472	86.3464	86.2191	83.9969	85.8767	85.9793	85.534	85.8767	85.1457	86.3135	85.4456	85.2414	86.0743	86.5145	86.5472
125	P. asiatica	86.9717	85.534	87.1018	87.2966	87.4398	87.774	87.1018	86.5145	87.329	86.252	86.5145	86.3505	86.0545	86.9274	87.1954	86.5104	86.3095	87.0368	85.5916	87.0043	87.1668	86.8948	87.1018	86.5472	86.6127	86.8413	87.0577	86.874	86.6127	87.0654	85.8308	86.58	86.9352	86.9717	86.9678	86.7761	83.7932	86.0748	85.7805	85.534	85.8436	85.4456	86.5442	85.6781	85.4412	86.4699	86.7434	86.7434
126	P. pyomelaminifaciens	87.0043	85.534	86.9717	87.3614	87.4398	87.774	87.1018	86.4489	87.3938	86.252	86.58	86.3505	86.0874	87.0903	87.2279	86.6741	86.2766	87.0043	85.5584	86.8413	87.1018	86.7969	87.0368	86.5145	86.5145	86.8413	87.0252	86.7761	86.7108	87.163	85.7646	86.5145	86.87	86.8087	86.87	86.6781	83.7251	86.0748	85.7805	85.534	85.9428	85.4789	86.577	85.6781	85.408	86.6341	86.7761	86.8413
127	P. massiliensis	85.1259	84.3302	85.4256	85.3258	85.3702	86.0461	85.8234	85.7572	85.5252	85.1259	85.4256	85.5252	85.0591	85.4124	85.0546	85.2214	85.4168	85.9555	85.0591	85.7572	85.6248	85.2792	85.691	85.2259	85.4588	85.6248	85.4789	85.492	85.4256	85.4212	85.2324	85.0925	85.4544	85.5916	85.2881	85.1926	83.4182	84.475	84.408	84.3302	84.5423	83.8661	85.0154	83.7981	84.5713	84.8077	85.2925	85.3591
128	P. mangrovi	85.1123	83.9291	85.2792	84.7104	84.9558	85.2703	85.2125	84.6096	84.9451	85.0121	85.1457	84.8446	84.475	84.7637	84.974	84.8065	84.9025	85.2125	84.0696	84.744	85.0121	84.6965	85.1457	84.5086	84.576	84.7776	84.7637	84.6768	84.7104	84.84	84.4466	85.1123	85.408	85.5121	85.3747	85.2792	82.8985	83.8612	83.2694	83.9291	84.6292	83.8513	84.5296	84.1228	84.2534	84.6591	84.9451	85.1791
129	P. sichuanensis	87.5804	86.1737	87.6127	87.451	87.5619	87.6376	87.6773	86.9639	87.4834	87.029	87.289	87.1916	86.408	87.1801	87.4797	87.0252	86.8909	87.8385	86.2437	87.2241	87.3863	87.2451	87.5804	87.1591	86.9639	87.2566	87.4074	87.1266	87.451	87.8348	86.9078	87.5804	87.7059	87.5804	87.9957	87.5804	84.8736	86.5351	86.2682	86.1737	87.0174	86.2642	87.0282	86.4286	86.5886	87.4097	87.3863	87.6127
130	P. argentinensis	86.2396	84.6526	86.4367	86.3711	86.6133	86.5598	86.2066	86.0419	86.6334	85.9428	85.9428	86.1408	85.5121	86.2601	86.6621	86.2025	85.603	86.1408	85.3125	86.2066	86.5023	85.5987	86.3053	85.9428	86.5023	86.8948	86.8504	86.8948	86.3711	86.7602	86.6093	86.3053	86.5311	86.5351	86.7929	86.4695	83.5055	85.2658	84.7312	84.6526	85.3325	85.0653	85.5041	84.8308	85.2279	85.9292	86.2066	86.1737
131	P. straminea	85.6074	84.2098	85.7069	85.74	86.2477	86.2271	85.7069	85.6737	85.8063	85.2747	85.5742	85.408	84.6722	85.8928	86.1983	85.5366	84.8979	85.9055	85.0744	85.8063	85.9386	85.6608	85.7732	85.4412	86.0377	86.2025	86.4533	86.2025	85.9055	86.1983	85.7805	85.8394	85.9013	85.541	85.9674	85.9055	83.2265	84.9604	84.2536	84.2098	84.9939	84.0162	85.2991	84.8598	84.6872	85.626	86.2025	86.2025
132	P. punonensis	86.1696	85.1168	86.5311	86.2354	86.7404	86.5558	86.3341	85.8394	86.3341	85.8063	85.6737	85.7069	85.1078	86.223	86.5926	86.0665	85.5322	86.0046	85.2414	85.541	85.9716	85.6608	86.1696	86.0046	86.3998	86.7602	86.6173	86.2354	86.1696	86.4942	86.2105	86.1366	86.3957	85.9386	86.4286	86.4327	84.147	85.8928	85.3303	85.1168	85.7271	84.9939	86.0985	85.428	85.4902	86.1897	86.6294	86.4655
133	P. flavescens	85.603	84.2726	85.8682	85.802	85.4481	86.025	85.603	84.936	85.8351	85.3369	85.3369	85.5034	85.5698	85.4569	85.8639	85.4657	85.2947	85.4701	84.1953	85.4368	85.4035	85.3236	85.6694	85.3036	85.5366	85.5698	85.4236	85.7357	85.3369	85.3991	85.4437	85.5034	85.6983	85.6694	85.5987	85.7026	83.3002	84.5282	84.587	84.2726	85.0228	83.8414	84.7567	84.5525	84.5141	85.0535	85.4035	85.4035
134	P. seleniipraecipitatans	86.5558	84.974	86.3916	86.0292	86.7979	86.7444	86.0623	86.0292	86.1283	86.1942	85.6651	85.8639	85.6983	86.0827	86.5846	86.1571	85.756	86.1942	85.199	86.1283	86.3916	86.5108	86.1612	86.0623	86.2601	86.293	86.5765	86.3916	86.1942	86.3218	86.2682	86.5886	86.8464	86.3588	86.5189	86.1942	83.8754	85.7271	85.3882	84.974	85.5524	84.817	85.8909	85.2858	85.3481	86.2144	86.4245	86.3916
135	P. anguilliseptica	85.603	84.6768	86.0665	85.6362	85.4481	86.0911	85.8682	85.2035	85.8682	85.1701	85.1701	85.3036	84.7011	85.2902	85.3658	85.2992	85.6608	85.603	85.3036	85.5034	86.1654	85.6564	86.1324	84.5666	84.4992	84.936	85.756	85.003	84.2292	84.4945	85.1097	85.8682	85.3991	85.1367	85.3991	85.6362	83.5979	84.6535	83.7043	84.6768	84.9893	84.35	85.0261	85.0898	84.8841	85.4883	85.7689	85.9013
136	P. peli	85.9343	84.744	86.0665	86.0995	86.0124	86.2889	86.2971	85.4701	85.9013	85.2035	85.3702	85.7689	85.1367	85.5235	85.9301	85.9301	85.8928	85.9674	85.3369	85.5034	85.9013	85.3903	85.7357	85.2369	85.1033	85.3702	86.3506	86.0995	84.7011	84.9314	85.5103	85.8351	85.9962	85.9343	86.1612	86.1324	84.0404	85.4569	84.147	84.744	84.9558	84.9223	85.6955	85.4569	85.2858	85.221	85.7357	85.5366
137	P. guineae	84.3449	83.745	84.3449	84.4123	84.4223	84.234	84.446	84.2098	84.1083	84.176	83.8031	84.176	83.9389	84.0599	84.4413	84.475	83.963	84.2773	83.905	84.0745	84.2098	84.0599	83.9728	83.871	83.905	83.8031	85.0364	84.547	83.7691	83.9679	84.0453	84.446	84.4413	84.3786	84.6096	84.547	83.9193	84.3305	83.6169	83.745	84.263	84.2968	84.6357	84.3643	84.4608	83.7143	84.0067	83.871
138	P. cuatrocienegasensis	87.1591	85.492	87.1591	87.2241	87.0422	87.1189	87.2566	86.5719	86.8008	86.408	86.4736	86.4408	86.408	86.7236	87.0577	87.0252	86.2354	86.7355	85.914	86.7682	86.7355	86.6254	86.8661	86.5064	86.5064	86.6701	87.2451	86.8661	86.0131	86.4039	86.4163	87.4187	87.2203	87.0941	87.3825	87.0616	84.5619	85.6362	85.1051	85.492	86.4614	85.7689	86.6347	86.1324	86.5886	86.4288	86.5719	86.408
139	P. marincola	84.8019	83.7301	85.1033	85.2369	85.1476	85.3947	84.6675	84.7683	84.7011	85.2703	85.1701	84.7683	84.8019	84.7544	85.1322	84.7301	84.0501	84.8354	84.4318	84.9025	85.3369	84.8216	84.5666	84.4318	84.7683	84.5666	85.8554	84.9025	84.4655	84.7301	85.2434	85.1701	85.2658	85.5034	84.6628	84.6675	83.4954	84.788	84.0111	83.7301	84.2486	83.9094	84.8915	84.35	84.5478	84.4809	84.7011	84.6675
140	P. segetis	84.0938	83.6961	84.4318	83.9581	84.3066	84.2195	84.2292	84.0599	84.2292	84.2292	83.9921	83.7202	83.7202	83.8414	84.0889	83.9193	83.7443	84.2968	83.8902	84.869	84.4318	84.3162	84.0599	83.5156	83.7542	83.3789	84.8552	84.2292	83.6179	83.9872	84.2002	84.3643	84.9314	84.936	84.3258	84.0938	82.3586	84.1809	83.7043	83.6961	83.7393	83.3978	84.1129	83.9774	84.3452	84.3795	83.8562	84.0599
141	P. taeanensis	84.2341	83.9385	84.3695	84.3357	84.6835	84.9665	84.3357	84.2002	84.2002	84.0306	83.9287	84.3695	83.9287	84.1857	84.4999	84.6011	84.0208	84.6395	83.9627	84.1324	84.3695	84.2536	84.4033	84.2341	84.6732	84.8077	84.6011	84.268	84.2002	84.5674	84.78	84.7068	85.1051	84.8413	84.9039	84.9085	83.0527	84.1857	83.9816	83.9385	84.0499	84.2197	84.322	83.9479	84.2826	84.8242	85.1766	84.8749
142	P. benzenivorans	86.4983	84.8492	86.2396	86.0707	86.0166	86.7196	86.2354	85.7732	85.9055	85.6406	86.367	85.541	85.5077	85.8597	86.0995	85.7026	85.6983	85.8394	85.5077	86.1036	86.1036	85.5943	86.0707	85.3747	85.5077	85.9386	86.5189	86.1696	85.9716	86.0665	85.9793	86.2025	86.1983	86.4327	85.9343	85.6406	83.3293	84.8598	84.4904	84.8492	85.2947	84.759	85.366	84.8933	85.2902	85.7922	86.1036	85.6737
143	P. borbori	86.0461	84.4218	85.881	85.5497	85.7603	86.3998	86.0461	85.2503	85.5497	85.1502	85.7817	85.05	84.8492	85.603	85.7775	85.4124	85.6074	85.881	85.1836	85.6161	86.112	85.4035	85.7817	85.05	85.2836	85.5165	86.1983	85.881	85.05	85.4789	85.6896	85.9801	86.1408	86.112	86.0748	85.5165	83.5447	85.003	84.8367	84.4218	85.1701	84.936	85.107	85.3036	85.1656	85.834	86.1449	85.881
144	P. luteola	80.6503	79.4828	80.5438	80.3302	80.3707	80.6737	81.1455	80.4727	80.3659	79.9013	80.1518	80.2946	80.0445	80.3117	80.1098	80.0741	80.3179	80.3302	79.7218	79.9371	80.2232	80.0615	80.1518	79.578	79.9013	79.8654	80.7032	80.0088	79.8654	80.0025	80.1859	80.5082	80.5732	80.1161	79.9667	79.9729	80.0741	80.6148	79.6578	79.4828	80.0257	79.5586	80.4754	79.954	80.555	80.3337	80.5082	80.5082
145	P. zeshuii	80.5671	79.3255	80.5671	80.3535	80.3227	80.6616	81.2043	80.4248	80.2822	79.9245	80.2465	80.2822	80.032	80.442	80.2403	80.2046	80.3055	80.2108	79.6011	79.8169	80.1036	79.9414	80.032	79.6011	79.9245	79.9604	80.6555	80.032	79.8169	80.0257	80.2092	80.5671	80.4543	80.1036	79.954	79.9245	79.8464	80.4248	79.5727	79.3255	80.1564	79.5818	80.4631	79.9773	80.4715	80.3928	80.3892	80.496
146	P. duriflava	80.1036	79.5355	80.3179	80.3179	80.4297	80.4125	80.3535	80.032	80.2822	79.8169	80.6382	80.2822	79.5291	79.8337	80.0973	79.9182	80.3769	80.2108	79.2401	80.0678	80.1751	79.8696	79.9604	79.2401	79.9604	80.496	79.9773	79.9245	79.8528	80.0615	80.4593	80.496	80.5255	80.5316	80.276	80.2108	79.7386	80.0678	80.3632	79.5355	79.6539	80.1564	80.5346	80.049	80.1501	80.5	80.5671	80.8864
147	P. oryzihabitans	83.9532	81.9689	83.6129	83.5447	83.4852	84.147	84.1228	82.9965	83.3738	83.1682	83.5788	83.647	83.0652	83.5295	83.4713	83.1287	83.0204	83.6811	82.6518	83.8173	83.9872	83.427	83.5105	83.4422	83.647	83.6811	83.6661	83.4422	83.4422	83.642	83.1079	83.7152	83.7443	83.6811	84.1179	83.5788	80.7386	82.428	81.9715	81.9689	82.8774	82.1152	82.8032	82.3239	82.0748	83.2986	83.3396	83.3738
148	P. psychrotolerans	84.0018	82.09	83.628	83.662	83.4662	84.1615	84.2388	83.1152	83.4916	83.2865	83.7641	83.7301	83.1495	83.5788	83.4524	83.1786	83.1048	83.6961	82.8058	83.8661	84.205	83.4764	83.662	83.4574	83.6961	83.7641	83.647	83.662	83.5939	83.7592	83.187	83.7301	83.8612	83.7301	84.0986	83.628	80.8276	82.4443	82.0581	82.09	82.9621	82.1666	82.9229	82.4096	82.3001	83.4357	83.5598	83.5257
149	P. chloritidismutans	82.6757	82.2361	82.9172	82.8827	82.545	83.01	82.5719	82.4334	82.4681	82.0511	82.6065	82.4681	81.7718	82.4865	82.3933	82.4626	82.6304	82.7102	82.5027	82.6065	82.7793	82.5558	82.8482	82.1903	82.2946	82.6065	82.0748	82.364	81.8767	82.2544	82.192	82.5027	82.8085	82.5373	82.7049	82.3293	81.959	82.625	82.3789	82.2361	82.8669	82.4171	83.1039	83.0392	82.8616	82.8989	82.8827	83.0204
150	P. kunmingensis	82.7049	82.2306	83.2557	83.2214	82.7128	83.2797	82.8085	82.4626	82.6703	82.3586	82.8774	82.6012	81.7662	82.4811	82.4919	82.4919	82.9703	82.9463	82.6012	82.774	83.2899	82.6543	83.1183	82.4973	82.5666	82.6703	82.1738	82.5319	82.2196	82.4572	82.4995	82.8085	83.0788	82.8774	83.0444	82.774	81.6734	82.6197	82.3735	82.2306	82.758	82.3074	83.2022	82.8961	82.7527	82.8591	82.9463	82.9463
151	P. songnenensis	83.3978	82.2361	83.432	83.5004	83.2007	83.627	83.6711	83.1579	83.3978	82.9516	83.2608	83.0892	82.6065	83.451	83.6661	83.2899	83.4219	83.5687	82.7447	83.2265	83.4662	83.0736	83.2265	83.1922	83.5004	83.637	83.2505	82.9516	83.1579	83.3927	82.5049	83.4662	83.6661	83.3636	83.9045	83.4662	81.7492	83.211	82.3093	82.2361	82.7979	81.7198	83.2418	82.6942	82.758	83.5525	83.3978	83.2951
152	P. perfectomarina	82.2946	80.975	82.0511	82.2599	82.1627	82.5612	82.4334	81.8767	81.8767	81.2102	81.7019	82.2251	81.9116	81.7198	82.2196	81.9409	81.6554	82.0163	81.4915	81.6668	82.1208	81.5094	82.0859	81.9465	81.9465	82.4334	81.9702	81.9465	82.0511	82.3586	82.1572	82.3293	82.5666	81.9465	82.15	81.9116	80.833	82.4865	81.2927	80.975	81.6848	80.6616	81.6399	81.122	81.7492	82.135	82.3987	82.2599
153	P. stutzeri	83.5346	81.9228	83.2951	83.5004	83.4751	83.8996	83.6029	83.1235	83.3978	83.0548	83.7733	83.0892	82.986	83.0047	83.427	83.2899	82.9755	83.3293	82.5027	83.7052	83.3978	83.3825	83.5687	82.9172	83.0548	83.3978	83.2162	83.2608	83.2265	83.5295	83.2642	83.9434	83.7684	83.4662	83.5637	83.0892	81.1867	82.7288	81.8553	81.9228	82.6596	81.8248	82.8619	82.5211	82.7234	83.3467	83.2951	83.3978
154	P. balearica	82.5005	81.817	82.5351	82.4659	82.0567	82.8005	82.6387	81.7359	81.8755	81.7708	82.1886	82.0148	81.631	82.311	82.5988	82.2873	81.8294	82.6732	81.2452	82.1192	82.2234	81.7888	82.3274	81.701	82.1886	82.3621	82.8641	82.2234	82.1539	82.4951	82.1208	82.9143	82.7368	82.6732	82.7713	82.8455	80.1937	81.9284	81.1514	81.817	82.033	80.8749	81.8497	81.4737	81.1514	82.0232	82.0496	82.2581
155	P. saudiphocaensis	82.2763	82.1831	82.5189	82.7262	82.9066	83.1287	82.7262	82.311	82.4497	82.1374	82.2416	81.7189	82.1026	82.5373	82.6864	82.4443	82.2654	82.5881	81.7539	82.4843	82.7607	82.8827	82.9329	82.5189	82.8296	83.1391	83.1631	83.1734	82.9329	83.2025	83.2454	83.1734	83.3053	83.242	83.7152	83.0704	81.0632	81.8767	82.1168	82.1831	82.5373	82.0859	82.531	82.2251	82.428	82.6035	82.6572	82.1374
156	P. xanthomarina	82.2946	81.5381	82.3293	82.9172	82.545	82.8722	82.8138	82.6065	82.5373	82.3987	82.364	82.364	82.0511	82.3129	82.1848	82.1848	82.04	82.5719	82.2251	82.6065	82.6757	82.3129	82.7102	82.4681	81.4915	81.9814	82.3531	82.2251	82.3293	82.5319	82.1223	82.7447	82.5666	82.3293	82.4626	82.2251	81.1161	81.7898	81.9953	81.5381	82.3477	81.1926	81.956	81.5094	81.7141	82.8298	82.5027	82.6757
157	P. zhaodongensis	81.1044	81.1514	81.351	81.7369	80.9333	81.3394	81.0691	80.6798	81.0338	80.4665	80.6443	80.9631	80.7152	81.3335	81.1691	80.9572	80.8096	81.0691	80.7507	80.7861	81.1749	80.9453	81.1749	80.7861	80.4309	81.2102	80.8096	80.5732	80.4309	80.4604	80.6434	81.1397	81.4858	81.2102	81.0632	80.8216	80.1206	80.6261	81.0098	81.1514	81.0867	80.6261	81.1809	80.8036	81.2925	81.2221	80.8216	81.3861
158	P. azotifigens	82.9965	81.2336	82.5135	82.4789	82.6596	82.9516	83.1339	81.7831	82.5481	81.5381	82.4789	82.3749	82.2361	82.4973	82.681	82.3695	82.1556	82.4789	82.0274	82.3056	82.6518	82.2544	82.7209	81.9228	82.2361	82.5481	82.6757	82.5481	82.097	82.5427	82.3769	82.9277	82.3348	82.5827	82.6119	82.1318	79.7746	81.3803	81.1985	81.2336	81.906	80.8864	82.2121	81.4506	81.2689	82.875	82.6518	82.7209
159	P. urumqiensis	82.5535	80.7807	82.415	82.5881	82.2141	83.0944	82.6917	81.8935	82.2069	81.8935	82.033	82.3804	81.8586	82.2946	82.5481	82.4789	82.2654	82.1374	81.8586	82.6917	82.7262	82.4681	82.5535	82.2069	82.2416	82.5189	82.4388	82.415	81.9633	81.9577	82.1738	82.4843	82.7554	82.7607	82.8933	82.415	80.1751	81.2454	80.7085	80.7807	81.7369	81.0338	81.8327	81.1749	81.4506	82.3953	82.5189	82.3804
160	P. matsuisoli	82.4605	81.4967	82.5643	82.5297	82.1903	82.8296	82.8746	81.7652	82.5297	81.4151	82.1484	82.3566	82.1831	82.4443	82.1776	82.2471	81.8935	82.322	81.7652	81.9396	82.4605	81.9925	82.8058	81.7302	82.2179	82.1484	82.3749	82.5643	82.2526	82.5934	82.2196	82.1484	82.4551	82.2179	82.5243	82.2526	80.3659	81.6082	81.4275	81.4967	81.8181	81.1514	82.089	81.2923	81.4271	82.5396	82.7713	82.7713
161	P. kuykendallii	85.1251	83.3723	84.6928	84.8229	84.968	85.3838	85.192	84.3842	84.6545	83.977	84.5195	84.9573	84.3165	84.809	85.0199	84.8183	84.6788	84.8901	83.977	84.7892	85.058	84.7219	84.9909	84.6882	84.6882	85.058	84.809	85.058	84.6207	84.6835	84.336	85.4594	85.4216	85.058	85.221	84.7556	82.5125	83.6893	82.8619	83.3723	84.21	83.6652	84.2102	83.631	84.1033	84.844	84.5532	84.5532
162	P. chengduensis	86.1449	85.0591	86.5064	86.3423	86.1571	86.3012	86.6701	85.7817	86.0131	85.6824	86.2108	85.6824	85.6824	86.1324	86.0748	85.9758	85.8063	86.112	85.1502	85.9471	86.2437	85.6694	85.8479	86.0131	85.7817	85.6492	86.0004	85.4833	85.0166	85.3125	85.4902	86.3423	86.1408	86.0461	85.9428	85.5829	83.9193	84.869	85.0716	85.0591	85.7026	84.6675	85.6752	85.3369	85.3658	85.4349	85.8148	86.1779
163	P. sihuiensis	85.9428	84.5181	86.1078	85.7775	86.1859	85.9013	86.2066	85.6117	85.4789	85.3125	85.5785	85.3791	85.3125	85.8308	85.8725	85.5077	85.4035	85.6781	84.6432	85.5453	85.9428	85.4657	85.5785	85.5453	85.8106	85.6781	86.0623	85.6117	85.1791	85.3414	85.5856	85.9428	85.8725	85.8106	85.9055	85.4456	83.4029	84.6628	84.4952	84.5181	85.2992	84.2243	85.1024	84.9649	84.9268	85.1965	85.6117	85.7775
164	P. toyotomiensis	85.8308	85.0075	86.0292	86.0623	85.9089	86.0539	86.4245	85.6319	85.7314	85.5987	85.9301	85.5322	85.3991	85.6521	85.5943	85.2947	85.5235	86.0292	84.9649	85.8639	86.0623	85.5191	85.7314	85.6319	85.5322	85.4657	85.8511	85.7646	85.2658	85.4946	85.239	85.897	86.0911	85.9301	85.6939	85.3658	83.6611	84.6488	84.9863	85.0075	85.6521	84.6488	85.7911	84.9847	85.1142	85.0825	85.5655	85.897
165	P. alcaliphila	86.079	85.2925	86.112	86.3752	85.9589	86.3012	86.408	85.6824	85.881	85.7155	86.1779	85.6492	85.45	86.0995	86.0419	85.7443	85.74	86.0461	85.1502	86.0131	86.4736	85.9343	85.7155	85.881	85.5497	85.7155	86.0995	85.9801	85.2503	85.5121	85.4902	86.3752	86.1408	86.2108	86.0748	85.5165	84.1567	85.0699	84.9711	85.2925	85.7357	84.8354	85.7418	85.802	85.7314	85.6014	86.1779	86.4408
166	P. sedimidis	86.0461	85.2259	85.914	86.1449	86.1571	86.1366	86.079	85.881	85.7486	85.7486	85.8479	85.5497	85.5165	85.6694	85.8436	85.3791	85.308	85.8479	85.3169	85.7486	86.112	85.9343	85.8148	85.7155	85.6492	85.8148	86.2642	85.7817	85.2503	85.4789	85.8223	86.4408	86.2725	86.3423	86.2066	85.881	83.9872	85.3369	84.7695	85.2259	85.2369	84.4992	85.5419	85.0699	85.2324	85.7012	86.1779	86.1779
167	P. indoloxydans	85.992	84.4318	85.6276	85.6276	85.6391	85.7185	85.7603	85.1611	85.2279	85.4946	85.428	85.328	85.1277	85.4148	85.59	85.357	85.4192	85.6608	84.2534	85.4946	85.5278	85.2479	85.2613	85.0608	85.2613	85.1946	85.7805	85.5943	84.8598	85.357	84.9329	85.4946	85.7891	85.5278	85.5567	85.1611	83.1767	84.6778	84.2391	84.4318	84.9802	84.1712	85.2856	84.7451	84.6395	84.6742	85.2613	85.6608
168	P. oleovorans subsp. oleovorans	85.9878	84.6292	85.59	85.6896	85.7344	85.5813	85.7891	85.1232	85.1566	85.0228	85.2235	84.9893	85.0563	85.4104	85.6189	85.3525	85.3481	85.59	84.1131	85.3903	85.5235	85.3436	85.1232	85.2569	85.3236	85.2569	85.5436	85.5567	84.8216	85.2524	85.1631	85.4236	85.7517	85.5235	85.3859	85.1566	83.2059	84.7405	84.2003	84.6292	84.9421	84.268	85.2812	84.6395	84.6011	84.737	85.4569	85.4236
169	P. pseudoalcaligenes subsp. pseudoalcaligenes	86.0665	84.744	85.7026	85.802	85.8137	85.6608	85.9013	85.2369	85.2703	85.1367	85.3369	85.1033	85.1701	85.5235	85.7314	85.4657	85.4613	85.7026	84.2292	85.5034	85.6362	85.3903	85.2035	85.3369	85.4368	85.3702	85.6564	85.6694	84.936	85.3658	85.2769	85.5698	85.8639	85.6362	85.499	85.2703	83.3242	84.8216	84.3504	84.744	85.0563	84.3838	85.395	84.7544	84.7161	84.8855	85.5366	85.5366
170	P. guguanensis	85.4412	83.8031	85.2414	85.308	85.6189	85.6983	85.6737	84.7058	85.0075	84.6049	84.9071	85.0075	84.7394	85.2279	85.3036	85.1033	84.7301	84.8065	84.6386	85.408	85.3747	84.9268	85.6406	84.7394	85.0744	85.1412	85.8597	85.8063	85.2414	85.5034	84.7788	85.1412	85.3702	85.208	85.7689	85.308	82.4681	83.9483	83.8117	83.8031	84.321	83.7443	84.5587	83.9483	84.1809	84.2487	84.6049	84.6049
171	P. mendocina	86.0665	84.2726	85.802	86.0335	85.9793	86.3547	85.9013	85.3702	85.5366	85.4035	85.6694	85.2369	84.936	85.5567	85.9301	85.5987	85.328	85.3369	84.6339	85.5698	86.1324	85.6232	86.0004	85.003	85.3369	85.5034	86.2188	86.2313	85.1367	85.5655	85.21	86.0004	85.5987	85.5698	85.2324	85.003	83.2214	84.6872	84.0111	84.2726	85.1901	84.5525	85.2946	84.788	85.1187	85.0535	85.5366	85.6362
172	P. fluvialis	83.7343	82.7846	83.632	83.632	83.2986	83.7584	84.0064	83.2557	83.3585	83.2557	83.2214	83.427	83.3927	83.8216	84.1034	84.0694	83.9627	84.2099	83.2557	83.8705	83.9045	83.8266	84.2099	83.5295	83.4612	83.3585	84.268	83.7002	83.5637	83.5587	83.6461	84.0404	84.5768	84.4466	84.0015	83.9045	81.8835	83.3431	83.1352	82.7846	83.1371	83.1027	83.4432	83.1371	83.338	83.7968	83.9385	83.9045
173	P. pharmacofabricae	83.6661	82.7501	83.4954	83.6661	83.1267	83.6902	83.8365	83.1183	83.2557	83.1527	83.187	83.3242	83.1527	83.7534	84.0355	83.9336	83.7925	84.176	83.2214	83.7684	83.8365	83.7584	84.1421	83.4612	83.2899	83.1527	84.1324	83.632	83.427	83.4903	83.6119	83.9385	84.4756	84.2776	83.8315	83.8024	81.7785	83.3088	82.9973	82.7501	83.1371	83.1027	83.3056	83.0339	83.4066	83.6943	83.8705	83.8365
174	P. alcaligenes	85.5725	83.6511	85.1386	85.3726	85.0489	85.5638	85.6723	84.9039	85.0046	84.8031	84.8367	85.0716	84.5336	85.3926	85.6347	85.2679	85.3971	85.5392	84.1615	85.3058	85.4059	84.9283	85.5392	85.0381	84.9375	85.1386	85.5594	85.2724	85.0046	85.201	85.1205	85.8715	85.7676	85.5725	85.834	85.3392	82.5635	84.3842	84.3508	83.6511	84.6545	83.7726	85.0278	84.6207	84.6498	84.7276	84.8031	84.7695
175	P. furukawaii	83.1837	81.7416	83.3549	83.2865	83.1922	83.3789	83.2865	82.7024	83.2522	82.4259	82.8058	83.1495	82.4605	83.1682	83.2471	83.2128	82.8296	82.909	81.835	83.2865	83.2865	82.7209	83.662	82.5297	82.7368	83.1152	83.2025	83.3207	82.6333	83.0069	82.4626	82.8746	83.0756	82.8402	83.0069	82.4605	80.863	82.6173	81.7785	81.7416	82.0622	81.8879	82.5766	82.097	82.2654	82.6782	82.909	82.7368
176	P. resinovorans	83.9001	82.4713	83.934	83.934	84.1131	84.0938	84.3401	83.4574	83.8661	83.218	83.3891	83.4574	83.5257	84.1228	84.3015	84.4028	83.7882	84.1711	82.8746	83.934	84.0696	83.4422	83.9001	83.3891	83.5257	83.934	83.9193	83.662	83.1495	83.623	83.4954	84.0696	84.3691	84.0018	83.9291	83.8321	81.4973	83.1682	82.7872	82.4713	83.2025	83.0996	84.0546	83.408	83.3687	83.4357	83.6961	83.8661
177	P. otitidis	83.7592	82.1192	83.657	83.963	83.3927	84.0889	84.1325	82.766	83.5889	82.9726	83.3156	83.623	83.2128	83.8804	84.1615	83.7882	83.408	83.7932	82.697	83.9291	84.1663	83.1974	83.7932	83.3498	83.4865	83.7251	83.6761	83.7251	83.3498	83.4473	83.5245	84.3353	84.2292	83.8951	83.9921	83.7251	81.3861	82.9568	82.4008	82.1192	82.7846	82.2306	83.2281	82.888	82.9172	83.6018	83.4865	83.2471
178	P. indica	83.1016	81.4497	83.3411	82.93	83.11	83.2967	83.307	82.101	83.033	82.6547	82.7925	82.93	82.6547	83.0174	83.4385	83.0278	82.8508	82.9644	82.1357	83.4777	83.3411	82.7766	83.2728	82.8613	83.4094	83.4777	82.8455	82.6892	83.1016	83.4044	82.6917	83.614	83.813	83.5459	83.5408	83.1016	80.4616	82.1192	82.0455	81.4497	82.0148	81.8406	82.944	82.2927	82.3913	83.2848	83.0673	83.5799
179	P. delhiensis	83.8738	81.6285	83.4966	83.5997	83.5744	83.8297	84.0446	82.7712	83.2211	82.5975	83.1866	83.359	82.5975	83.6875	83.9714	83.4915	82.934	83.4966	82.8753	83.8054	83.634	83.5501	83.8738	83.1866	83.6683	83.9422	83.6189	83.2901	83.1866	83.5603	83.0169	83.8738	83.7319	83.1521	83.5946	83.2556	80.8133	82.5464	81.7007	81.6285	82.4179	81.7169	82.8998	82.2432	82.4473	83.0946	83.3246	83.0138
180	P. humi	83.6079	81.5088	83.2317	83.3345	83.4459	83.8705	83.8123	82.3695	83.06	82.5081	83.1631	83.1631	82.4388	83.5245	83.8414	83.5687	82.9808	83.5396	82.681	83.6761	83.6761	83.3191	83.8464	83.0256	83.2317	83.6079	83.5587	83.2659	83.0944	83.3978	82.9598	83.6761	83.3978	82.9913	83.2951	82.9913	80.3769	81.9353	81.4748	81.5088	82.2836	81.48	82.5202	81.8654	82.2086	83.1404	83.2659	83.2317
181	P. citronellolis	83.0892	81.1514	82.986	83.2951	83.4408	83.4903	83.5346	82.364	82.9172	81.9465	82.6411	83.0892	82.2599	83.2454	83.3242	83.0152	82.665	82.8482	82.0163	83.1922	83.0204	83.0392	83.0892	82.7102	82.7447	83.0204	83.2454	82.986	82.6065	83.0496	82.3313	82.7793	83.0152	82.9516	83.0496	82.7447	79.9414	81.5094	81.3633	81.1514	81.7898	81.3335	82.1661	81.5796	81.5739	82.6167	82.8827	82.4681
182	P. knackmussii	84.0015	81.7369	84.1373	83.9676	83.8067	84.3647	84.2051	83.2505	83.7975	83.0444	83.5587	83.2848	82.8377	83.5435	84.0306	83.6561	83.1027	83.627	82.8377	83.8996	83.9676	83.8507	84.5093	83.1819	83.5587	83.4903	84.0015	83.8315	82.8722	83.6561	83.4255	84.1034	84.3018	83.7634	84.268	83.7975	80.9274	82.9598	81.7739	81.7369	82.8563	82.093	83.0243	82.6835	82.8855	83.7085	84.0694	83.5587
183	P. panipatensis	83.5738	82.033	83.5396	83.4371	83.1715	83.3242	83.642	82.888	82.9568	82.6119	83.3002	82.9224	82.5427	83.4903	83.8414	83.3636	83.0152	83.1287	82.4042	83.2659	83.5738	83.4561	83.1974	82.9224	83.3345	83.642	83.7733	83.5396	82.7501	83.2265	83.2694	83.4371	83.6029	83.3345	83.6029	83.2659	80.4482	82.3531	81.8259	82.033	82.2836	82.2489	82.555	82.5265	82.4171	82.968	82.9568	82.8191
184	P. jinjuensis	84.0694	82.0511	84.0015	83.8996	83.909	84.297	84.408	83.3191	83.6952	83.0444	83.7293	83.7293	83.4561	83.8848	83.9287	84.1663	83.7193	84.2051	83.01	83.6611	83.6952	83.1663	84.3066	83.5245	83.7293	84.4756	83.9676	83.8996	83.8996	84.2002	83.9721	83.7293	83.9966	83.627	84.0985	83.6952	81.069	82.9942	82.1239	82.0511	82.8563	82.302	83.3349	82.4062	82.92	83.9475	83.5587	83.6611
185	P. nitritireducens	84.5039	82.0844	84.3353	84.1325	84.0743	84.6292	84.4028	83.5889	84.234	83.5206	83.8951	83.963	83.5889	83.7102	84.1276	83.8902	83.7833	84.1325	82.8005	83.8612	84.1325	83.3002	84.4028	83.4865	84.0309	84.0309	84.1857	84.234	83.963	84.4655	83.6611	83.9291	84.3643	83.9291	84.026	83.8612	81.2806	83.1631	81.8429	82.0844	83.1287	82.4388	83.3657	82.8535	82.7793	83.5676	83.7932	83.5889
186	P. nitroreducens	84.5336	82.3531	84.297	84.1954	84.0353	84.6254	84.3985	83.6511	84.1615	83.5827	83.8557	83.8897	83.4801	83.8408	84.2584	83.8507	83.6752	84.1954	82.8271	83.8557	84.1615	83.3964	84.7358	83.4801	84.0937	84.0257	84.3165	84.2632	83.9237	84.4276	83.7577	84.0937	84.4276	84.1276	84.2245	84.0597	81.2691	83.1215	82.0079	82.3531	83.1903	82.4301	83.3934	82.8457	82.7713	83.8694	84.0597	83.7534
187	P. aeruginosa	83.9823	82.1721	83.5396	83.5055	83.5486	83.7684	83.7443	83.0944	83.1287	82.7846	83.3345	83.0256	82.9224	83.8655	84.2824	83.7052	83.084	83.8464	82.888	83.642	83.7783	82.9755	83.5396	83.1631	83.5396	83.4713	83.8655	83.3002	83.06	83.3978	83.4408	84.0162	83.6711	83.3687	83.7052	83.4029	80.839	82.7341	82.2103	82.1721	82.2141	82.04	83.0055	82.3531	82.5558	83.5867	83.2659	83.0944
188	P. composti	84.8354	83.3891	84.7347	84.3981	85.1142	84.7254	84.4655	83.8902	84.4318	83.8222	84.5329	83.9242	83.8222	84.35	84.8644	84.3258	84.1179	84.2968	83.6861	84.4318	84.5666	84.147	84.6675	84.2292	84.936	84.9025	85.2569	84.869	84.7011	84.9984	84.6732	84.8354	84.5282	84.1953	84.8644	84.4655	82.3586	84.2486	82.9838	83.3891	83.7052	83.3636	84.215	83.7393	83.9385	84.3213	84.1953	84.2968
189	P. thermotolerans	83.1203	81.292	83.0517	82.8455	82.8535	83.11	83.5648	82.3967	82.9487	82.4313	82.983	82.9143	82.4313	83.0361	82.8402	82.6679	82.7315	83.36	82.1539	82.7422	83.0174	82.7262	83.3942	82.3621	82.6042	82.9143	82.8296	82.5696	82.5005	82.7713	82.5027	82.7766	83.0465	82.7077	82.8746	82.7766	80.2651	81.9633	80.833	81.292	81.7888	81.2629	82.4083	81.5438	82.0274	82.4409	82.4313	82.7077
190	P. flexibilis	83.165	81.1983	82.5804	82.9248	82.7952	83.086	83.1992	82.3037	82.7872	82.2343	82.8904	83.4044	83.0964	83.1152	83.1255	83.0912	82.6042	83.3702	82.3383	83.3019	83.0621	82.7024	82.8216	82.856	83.1992	83.4726	83.4233	82.6839	82.7872	83.1598	82.5827	82.7183	83.1255	82.856	83.2283	83.0278	80.491	81.6953	81.7255	81.1983	82.4951	81.6603	82.6274	81.8699	82.2124	82.6596	82.7183	82.5804
191	P. tuomuerensis	82.9592	81.1983	82.4421	82.7183	82.6226	82.983	83.0964	82.4421	82.7183	82.3037	82.9248	83.165	83.0621	82.9434	82.9883	82.9883	82.5005	83.3019	82.3383	83.165	82.8904	82.5988	82.7528	82.5804	83.0621	83.336	83.218	82.5804	82.6149	83.1255	82.4096	82.6494	83.0912	82.856	83.1598	82.9248	80.491	81.6953	81.6204	81.1983	82.4259	81.5903	82.6621	81.7652	82.0733	82.6942	82.7872	82.6494
192	Azotobacter beijerinckii	82.7077	81.4674	82.6042	82.6042	82.6119	82.5243	83.086	81.9104	82.2234	82.0496	82.7077	82.3621	81.9452	82.5189	82.9778	82.6333	82.7315	82.8111	82.2234	83.0517	82.9487	82.6226	82.3274	82.3621	82.2581	82.8455	82.8985	82.6387	82.3621	82.7713	82.364	82.8455	82.8402	82.7422	83.0808	82.4659	80.2651	81.7539	81.2925	81.4674	81.6139	81.4386	82.0946	81.5789	82.1318	82.1279	82.0844	82.3967
193	Azotobacter chroococcum	82.9248	81.5139	82.4076	82.8216	82.8296	82.9487	83.0964	82.0955	82.269	82.0607	82.5458	82.7528	82.269	83.0808	83.2283	82.644	82.4313	83.0278	81.9912	83.0964	83.1992	82.6333	82.5113	82.4421	82.4767	83.0278	83.0122	82.9592	82.8216	83.0912	82.3056	83.0964	82.9883	82.9592	82.9883	82.6839	79.8486	81.2042	81.6204	81.5139	81.7302	81.1338	82.3148	81.4502	81.6546	82.6942	82.4076	82.4421
194	Azotobacter chroococcum (2)	82.9248	81.5139	82.4076	82.8216	82.8296	82.9487	83.0964	82.0955	82.269	82.0607	82.5458	82.7528	82.269	83.0808	83.2283	82.644	82.4313	83.0278	81.9912	83.0964	83.1992	82.6333	82.5113	82.4421	82.4767	83.0278	83.0122	82.9592	82.8216	83.0912	82.3056	83.0964	82.9883	82.9592	82.9883	82.6839	79.8486	81.2042	81.6204	81.5139	81.7302	81.1338	82.3148	81.4502	81.6546	82.6942	82.4076	82.4421
195	P. oryzae	83.672	81.718	83.1941	83.0226	83.1339	83.2522	83.5017	82.2635	82.9883	82.9195	83.1941	82.7819	82.2289	83.3498	83.4966	83.1889	83.1152	83.7741	82.713	83.3309	83.3651	82.8349	83.5017	83.0912	83.5017	83.7401	83.7932	83.2967	83.3309	83.667	83.1631	82.8508	83.3258	83.0569	83.4966	83.1941	80.5914	82.1081	82.1738	81.718	82.3165	82.1081	82.7952	82.0385	82.1374	82.9306	82.9883	83.1941
196	P. guangdongensis	83.4916	82.4713	83.4233	83.218	83.1922	83.7202	83.8321	82.7368	83.3549	83.218	83.662	83.1152	82.5643	83.5105	83.963	83.4524	83.4131	84.0696	82.7368	83.628	83.5939	83.0652	83.3549	83.5939	83.8661	83.7301	83.7152	83.4574	83.4574	83.7932	83.1527	83.6961	83.5206	83.9679	83.963	83.4574	81.1455	82.5827	82.5796	82.4713	82.9277	82.7554	83.5423	83.0309	82.9568	83.2642	83.2522	83.4574
197	P. linyingensis	84.4507	82.6202	83.9099	84.0116	83.9872	84.205	84.6861	83.5017	84.147	83.7741	84.147	83.9099	83.3309	84.2678	84.8492	84.1422	84.1373	84.7868	83.3993	84.619	84.1808	83.8272	83.9777	83.7061	84.3159	84.5181	84.3691	84.147	83.9438	84.3449	84.2195	84.6861	84.4797	84.6526	84.7822	84.0793	81.4737	83.3156	83.0736	82.6202	83.1546	82.983	84.0062	83.1203	83.218	83.9917	83.9099	84.0455
198	P. sagittaria	84.2098	82.5113	83.9389	83.9389	83.9823	84.3691	84.6479	83.633	84.0067	83.633	83.9728	83.7351	83.3258	84.1615	84.6768	84.1035	83.963	84.7151	83.1889	84.2436	83.9389	83.652	84.0067	83.905	84.4123	84.5134	84.6339	84.2098	84.176	84.4413	84.2824	84.8492	84.475	84.8492	84.9451	84.4797	81.4328	83.1391	82.9995	82.5113	83.1837	82.9434	84.0013	83.3207	83.384	83.9868	83.905	84.1422
199	P. pohangensis	81.7369	81.6962	81.7718	81.7019	82.1683	82.04	82.0859	81.5617	81.9814	81.6668	82.0511	81.7019	82.2599	82.3824	82.4626	82.1848	82.04	82.5027	81.5617	81.5968	82.0511	81.7312	82.0511	81.5968	81.8767	81.7369	82.1556	81.7369	81.8068	82.0455	81.9297	82.4334	82.3239	81.9116	82.3933	82.2251	80.8685	81.7198	81.6097	81.6962	82.139	81.5445	82.3755	81.8598	82.1334	81.7264	81.6668	81.9465
200	P. hussainii	79.2269	78.8783	79.4432	79.6229	79.5189	79.3221	79.8739	79.1546	79.8381	79.1546	79.7306	79.4791	78.8287	79.9265	80.1178	80.0464	79.7896	79.9097	79.1546	79.7664	79.7306	79.5318	79.2269	79.1546	79.5511	79.2269	79.6037	79.5511	79.6947	79.9391	79.2959	79.4791	79.5806	79.6588	80.0821	80.124	78.3645	79.171	79.3782	78.8783	79.0263	79.4958	79.6938	79.5677	79.5973	79.3717	79.6229	79.6588
201	P. yangmingensis	78.4764	77.3491	78.659	78.4033	78.3689	78.7548	78.8774	78.586	78.5495	78.2934	78.513	78.8774	78.1467	78.346	78.7615	78.9434	78.9368	79.059	78.2568	78.4398	78.7683	78.4993	78.8774	77.8524	78.1467	78.3301	79.1908	78.513	78.3667	78.798	78.2658	78.513	79.1249	79.1315	79.0524	78.659	77.6393	78.529	78.2609	77.3491	77.8681	77.7204	78.3963	77.5354	78.1556	78.054	77.8893	77.9997
202	P. salegens	77.5916	75.8909	78.033	77.7022	78.2181	78.4216	77.6653	77.6285	77.739	77.8861	77.5916	77.9229	77.9229	78.0487	77.9893	77.8423	77.688	77.9596	76.4018	77.1477	77.8494	77.2	78.1429	77.6653	78.0696	77.5547	78.7426	78.581	77.8494	78.0993	78.0644	77.1105	78.0626	78.033	78.1359	77.9963	76.8951	77.0514	77.3717	75.8909	76.7906	76.8652	77.3952	77.0886	77.2669	77.4015	77.739	77.5916
203	P. pelagia	78.9997	77.2894	79.3255	78.3804	78.6386	79.3125	79.2171	78.0872	78.6725	78.8545	78.4901	79.1085	78.6725	78.5792	78.7022	78.4832	78.4398	78.6725	78.1239	78.3438	78.8545	79.0161	79.3255	78.3438	78.417	78.234	78.9798	78.8908	78.8908	78.9205	78.2658	78.4535	78.8478	78.3438	78.775	78.6725	77.6536	78.2132	77.7957	77.2894	77.5127	77.4386	78.263	77.8822	78.2062	78.5612	78.9271	78.7089
204	P. salina	78.8745	78.4877	78.9471	78.8019	78.9864	79.3321	79.2729	78.7292	78.5835	79.0921	78.9108	79.4893	78.6928	79.0723	79.1941	78.9405	78.7521	78.8382	78.6564	78.9108	79.1645	78.2706	78.8019	78.5835	78.1448	78.547	79.1809	79.2729	78.5835	78.9042	79.0161	79.0921	79.1579	78.5835	79.1217	78.9471	77.675	78.7817	78.2955	78.4877	78.5266	78.0505	78.7237	78.5266	78.227	78.8007	78.8745	78.8382
205	P. profundi	78.4079	78.129	78.7359	78.3713	78.3369	78.6496	78.5538	77.7843	77.9683	77.7843	78.1884	77.9683	77.7475	78.7521	78.6564	78.4741	77.7701	78.0784	77.563	77.9315	78.5903	78.1676	78.1884	78.0784	78.0784	78.0784	78.6428	78.5538	78.1151	78.6564	78.0365	78.1151	78.6928	78.2616	78.2547	78.1884	76.1151	77.4675	78.0084	78.129	77.8736	77.3934	78.4009	77.8736	78.0137	77.817	78.1151	77.9683
206	P. xinjiangensis	79.4367	78.3257	79.3286	79.0033	79.3682	79.4598	78.9671	78.531	79.1119	78.6402	78.6038	79.1119	78.6402	79.2006	79.2499	79.3221	79.0263	79.2564	77.7248	78.6038	78.9671	79.0559	79.3286	79.1119	79.3646	79.5087	79.2729	79.0395	79.1842	79.3221	79.2533	79.4367	79.1776	78.6038	79.1776	78.8946	77.0665	79.0559	78.6089	78.3257	78.8019	77.7404	79.1446	78.547	78.9405	79.148	79.3646	79.0395
207	P. abyssi	79.7664	78.5514	80.4088	79.8739	80.6269	80.3966	79.8739	79.1546	79.8023	78.9737	79.1908	79.9097	79.4072	79.6037	79.5806	79.7242	79.4662	79.6229	78.9737	79.5511	80.0526	79.6756	80.2309	79.5511	79.6947	80.0883	80.4971	80.3377	79.3711	79.7959	80.0866	79.9097	79.7601	79.9097	80.5093	80.3022	78.2181	79.3877	78.798	78.5514	79.3516	79.3155	79.8379	79.2072	79.2368	79.6603	79.6947	79.8739
208	P. gallaeciensis	80.0169	78.6969	80.5508	80.0169	80.7687	80.6096	80.0883	79.263	80.0169	79.2269	79.4432	80.0526	79.7306	79.8191	79.7242	80.0106	79.6819	79.8739	79.0461	79.6947	80.124	79.7115	80.3377	79.6229	79.587	80.2666	80.6745	80.5154	79.6588	80.1535	80.0866	79.8023	79.9391	79.8023	80.5448	80.2666	78.3279	79.4958	78.8707	78.6969	79.3877	79.4598	80.0176	79.3155	79.3451	79.7682	79.6588	79.9454
209	P. pachastrellae	80.3672	79.4496	80.5448	80.4738	80.9397	80.8161	80.4738	79.5087	80.2604	79.4727	79.6883	80.0464	79.9034	80.2062	80.1472	80.4321	79.4237	80.1891	79.3286	80.0106	80.4382	79.7769	80.5093	79.9749	80.0821	80.3672	80.7393	80.6866	80.296	80.3966	80.6148	80.3672	80.1472	80.1891	80.9281	80.4382	79.3386	80.2418	80.0194	79.4496	79.6332	79.8486	80.2264	79.4533	79.5549	80.1921	80.1891	80.722
210	P. aestusnigri	78.6834	78.3691	78.8287	78.3554	79.1941	78.9967	78.865	77.9526	78.9375	78.3189	78.6834	78.9012	77.9893	78.6631	78.531	78.312	78.6335	78.6106	78.1359	78.7561	79.0099	79.6037	79.4432	77.8791	78.5742	78.7924	78.99	79.0823	78.9012	79.1842	79.4043	78.9012	79.4007	78.7561	79.2564	79.0461	77.5189	78.8812	77.8822	78.3691	78.225	78.0784	78.9695	78.5174	78.4741	78.5724	78.9012	78.7924
211	P. oceani	79.1185	77.9299	79.263	78.7197	79.4828	79.3581	79.1185	78.2092	78.9375	78.026	78.0993	78.9737	78.2092	78.6267	78.4945	78.713	78.4147	78.7561	77.9526	78.4284	78.647	78.6631	79.4432	78.1726	78.8287	79.0823	79.0625	78.865	78.647	78.822	79.1151	79.1546	78.822	78.4649	79.148	78.7197	77.1111	79.1349	77.8084	77.9299	78.1884	77.5999	78.6777	77.8947	78.0347	78.3163	78.6834	78.647
212	P. sabulinigri	80.6572	79.276	80.6926	80.6572	80.7333	80.7514	80.4799	79.9454	80.5508	80.1953	80.6926	80.2666	79.8023	80.5681	80.4738	80.7574	80.5032	81.081	79.8023	79.9097	80.3377	80.5326	81.1162	79.6229	80.4088	80.3733	81.1338	81.292	80.4444	80.5802	80.1223	80.4444	80.5448	80.3377	80.6157	80.5154	79.0559	79.7832	79.1249	79.276	79.8549	79.6756	80.447	79.8907	80.0276	79.9119	79.8739	79.8381
213	P. formosensis	78.005	77.5034	77.9683	77.5999	78.0435	78.7224	77.8947	77.0812	77.3781	77.2669	77.6368	77.3781	77.4151	77.9104	77.6297	77.5558	77.991	78.1517	77.0812	77.563	78.225	78.5334	78.3348	77.1184	77.4521	77.8947	78.3873	78.3348	77.6368	77.9612	78.2201	78.4809	78.4741	78.3713	78.6199	77.8579	77.2377	78.3873	78.3024	77.5034	78.1676	77.7262	78.4376	78.5334	78.5631	78.0014	78.4809	78.4809
214	P. pertucinogena	78.5885	77.4613	78.5885	78.2221	78.3344	78.6845	78.5519	78.1486	78.1486	77.7801	78.0014	78.3322	77.9646	78.0014	77.9575	77.736	77.8767	78.5519	77.5581	78.1486	78.8439	79.0422	79.2797	78.0382	78.2588	78.8439	79.4114	78.5154	77.8539	78.1784	78.3275	78.1118	78.1416	77.8908	78.5451	77.9277	76.9705	78.054	77.7374	77.4613	78.3482	77.7587	78.6558	78.7508	78.1943	78.4468	78.3689	78.4055
215	P. litoralis	78.417	77.8806	78.8181	78.4535	79.1117	78.9864	78.8181	78.1239	78.3072	78.1239	78.3072	78.3804	78.1239	78.7251	78.5563	78.6293	78.1467	78.8181	77.6083	78.636	79.4338	79.1612	79.614	78.0505	78.4901	78.8181	78.798	79.2171	78.8181	78.8841	78.887	78.7817	79.3551	78.8181	79.3912	79.1809	77.5796	78.6887	78.0909	77.8806	78.2132	77.1787	78.6302	77.919	77.912	78.4513	78.5631	78.1973
216	P. xiamenensis	78.713	78.1063	78.6766	78.7857	79.0426	79.0625	78.9671	78.312	78.6766	78.1656	78.4945	78.4216	78.2388	78.9108	78.9604	79.1053	78.5903	78.9308	77.6142	78.4945	79.1842	79.0921	78.9671	78.2754	78.822	79.3286	79.0921	79.2203	78.9308	79.0691	78.8545	78.9671	79.0691	78.713	79.4662	78.9308	77.3265	79.1283	78.4993	78.1063	78.5835	77.998	78.671	78.1448	78.2844	78.4559	78.6766	78.5674
217	P. bauzanensis	79.0921	79.0691	79.4533	78.9471	79.5651	79.8718	79.6332	78.8019	79.3451	79.1283	79.3451	78.7655	78.7292	79.542	79.5189	79.6268	78.9338	79.1283	78.6199	78.8745	79.2006	79.2533	79.8127	78.8382	79.1645	79.3812	79.5059	79.8844	79.7051	79.8781	79.3421	79.3451	79.6268	79.5613	79.9139	79.4893	78.1537	79.036	79.2435	79.0691	79.2533	78.3804	79.1248	78.9634	78.9568	78.6182	78.9108	79.0196
218	P. saudomassiliensis	79.2368	78.3051	79.4893	79.0921	79.4569	79.6564	79.7051	78.6928	79.5613	79.4172	79.2006	79.0196	78.8382	79.578	79.6987	79.8064	79.2237	79.5613	78.1081	79.0196	79.7051	79.6499	79.6692	78.7292	78.9834	79.4533	79.542	79.6332	79.1645	79.3747	79.1612	79.6332	79.9497	79.4893	79.9497	79.4893	77.9699	79.614	79.4245	78.3051	79.1809	78.4535	79.4151	78.7817	78.8478	79.0192	79.5253	79.5613
219	Ventosimonas gracilis	74.4241	73.4546	74.2698	74.6165	74.3823	74.7536	74.6165	74.1152	74.0765	74.3084	74.0378	74.4626	74.6165	74.5532	74.6082	74.6165	74.137	74.7701	74.4626	74.2312	74.4241	74.399	73.8439	74.2698	74.3855	74.5011	74.9233	74.8467	74.4626	74.7618	74.6437	74.9233	74.6466	74.8467	75.6012	74.9233	72.8793	73.2807	73.9525	73.4546	74.707	73.8181	73.8535	74.051	74.0813	74.6793	74.5011	74.9616
220	P. caeni	76.0561	76.2219	76.1314	76.2066	76.3562	76.2288	76.3192	76.2066	75.943	76.6189	76.0561	75.1849	75.6785	75.9197	75.9353	76.2365	75.9275	76.1314	75.8675	75.943	76.3568	75.7307	75.7542	75.4511	75.1467	75.527	76.2588	75.6785	76.3192	76.2741	76.7234	76.5441	76.1613	75.9053	75.8975	76.2066	76.9249	76.7458	76.8057	76.2219	75.6928	75.9197	75.5822	75.9952	76.2887	76.4233	76.4317	76.1314
221	Oblitimonas alkaliphila	75.0357	75.2429	75.3031	74.8441	75.5299	75.4776	75.6455	75.4935	75.3031	75.4555	75.2268	75.4555	75.1122	75.279	74.9126	75.4094	75.5157	74.498	75.3031	74.8825	75.1122	75.3935	74.8057	74.8057	74.7289	74.9974	75.8351	75.4935	75.6455	75.5997	75.8639	75.0357	75.2951	75.3031	75.6376	75.6076	75.5378	75.5077	75.7566	75.2429	75.0879	75.1261	75.0122	75.2408	75.1563	75.5584	74.9974	75.2268
222	Thiopseudomonas denitrificans X2	77.5702	77.1403	77.9753	78.1587	77.9402	77.998	78.3417	77.1257	77.4963	77.3112	77.3853	77.9018	77.9018	77.807	77.7475	77.7475	77.9612	78.122	76.5664	77.9385	78.2685	78.1448	77.9753	77.0142	77.9753	77.9018	78.1011	77.9385	78.1953	78.0784	78.5563	78.0487	78.225	78.1953	78.9538	78.4147	76.2734	77.8438	77.3128	77.1403	77.8438	77.3636	78.04	77.3636	77.5785	78.1188	78.0854	77.865
223	Thiopseudomonas denitrificans DSM 28679	77.644	77.2145	78.0487	78.2319	78.0137	78.0714	78.4147	77.2	77.5702	77.3853	77.4593	77.9753	77.9753	77.8806	77.8211	77.8211	78.0347	78.1953	76.6412	78.012	78.3417	78.2181	78.0487	77.0886	78.0487	77.9753	78.1745	78.012	78.2685	78.1517	78.6293	78.122	78.2982	78.2685	79.0263	78.4877	76.3486	77.9174	77.3871	77.2145	77.9174	77.4377	78.1137	77.4377	77.6523	78.1923	78.1587	77.9385
224	Azomonas agilis	76.5217	76.7607	76.7831	77.192	76.6337	76.6189	76.5965	77.0065	76.8949	76.6339	76.5217	76.372	76.7458	76.3116	76.1014	76.8502	76.5066	76.4843	76.5217	76.8576	77.0807	76.6114	76.1467	76.5217	76.3345	76.2219	76.8726	76.7458	76.5591	76.5142	76.1382	76.297	76.8875	77.0436	77.1105	76.7458	76.4166	76.8354	77.3789	76.7607	76.574	77.5773	76.4305	75.973	76.2288	76.476	76.4094	76.5965
225	Entomomonas moraniae	67.3286	67.6902	67.7526	67.7103	67.8664	67.6034	66.8167	67.7949	67.4985	68.3002	66.9023	67.201	67.7103	67.0817	67.3174	67.1584	67.4337	67.4136	67.2861	67.2861	67.1158	67.5922	67.8793	67.2436	67.7526	67.7526	67.9215	67.6257	67.5409	67.4873	67.6436	67.7949	67.8683	67.4561	67.4873	67.6257	69.3419	68.6449	68.4858	67.6902	67.6346	67.6346	67.6482	68.2676	67.8352	67.4602	67.3711	67.4561
226	Cellvibrio japonicum	71.1076	69.343	70.8652	70.6221	70.5727	70.9266	70.2967	70.5815	70.1743	70.2559	70.0107	70.7843	69.7648	70.5111	70.531	70.0825	70.2766	70.4595	69.8059	70.2967	69.9698	70.3989	70.3374	70.0925	70.2559	70.5815	70.8359	70.5002	69.9289	69.9597	70.359	70.5815	69.9187	70.5002	70.1642	70.1743	70.134	70.9573	70.4823	69.343	70.0623	69.8984	70.0846	70.0623	69.9702	70.309	70.1334	70.2151
227	Escherichia coli	65.9593	64.9038	65.655	65.9159	66.4197	65.9355	65.4805	65.5678	65.9159	64.9108	65.742	65.655	65.7855	66.4233	66.337	66.2506	65.8921	66.9505	65.4368	66.5642	66.3919	66.0657	65.6985	65.7855	65.829	66.2623	65.7932	65.6114	65.4805	65.7736	65.8008	66.3055	65.8605	65.9593	65.5121	65.9593	64.5522	65.4879	65.646	64.9038	66.046	65.3057	65.2666	66.0893	66.0775	66.2628	65.9593	65.829
[truncated: 179 more columns]
