# Supplementary material for: Genomics in Bacterial Taxonomy: Impact on the Genus Pseudomonas
Source: Genes (Basel). 2020 Jan 29;11(2):139. doi: 10.3390/genes11020139 (PMC7074058; doi:10.3390/genes11020139)
Supplement: Supplementary file 1 [file genes-11-00139-s001.zip › TableS4_ComparisonConca4HesseParks_VS2MG.xlsx]

## Sheet: Hoja1
Supplementary Table S4. Correlation among the 4-genes, 100-genes MLSAs and the genera proposed in the GTDB Taxonomy. According to the GTDB Taxonomy the proposed genus Pseudomonas_E could be also subdivided in different clusters as highlited with different colors.
Phylogenetic assignation based on the 4-genes MLSA			Phylogenetic assignation based on 100-genes MLSA				GTDB Taxonomy
Species and strain analysed	Group	Subgroup	Species analysed	Strain	Group	Subgroup
Pseudomonas lurida P 513/18	fluorescens	fluorescens	lurida	LMG 21995	fluorescens	fluorescens	Pseudomonas_E
Pseudomonas simiae Oli	fluorescens	fluorescens	simiae	CCUG 50988	fluorescens	fluorescens	Pseudomonas_E
Pseudomonas canadensis 2-92	fluorescens	fluorescens					Pseudomonas_E
Pseudomonas azotoformans LMG 21611	fluorescens	fluorescens	azotoformans	LMG 21611	fluorescens	fluorescens	Pseudomonas_E
Pseudomonas extremorientalis LMG 19695	fluorescens	fluorescens	extremorientalis	LMG 19695	fluorescens	fluorescens	Pseudomonas_E
Pseudomonas aylmerense S1E40	fluorescens	fluorescens
Pseudomonas costantinii LMG 22119	fluorescens	fluorescens	costantinii	LMG 22119	fluorescens	fluorescens	Pseudomonas_E
Pseudomonas salomonii LMG 22120	fluorescens	fluorescens	salomonii	ICMP 14252	fluorescens	fluorescens	Pseudomonas_E
Pseudomonas antarctica LMG 22709	fluorescens	fluorescens	antarctica	LMG 22709	fluorescens	fluorescens	Pseudomonas_E
Pseudomonas fluorescens ATCC 13525	fluorescens	fluorescens	fluorescens	ATCC 13525	fluorescens	fluorescens	Pseudomonas_E
Pseudomonas poae LMG 21465	fluorescens	fluorescens	poae	LMG 21465	fluorescens	fluorescens	Pseudomonas_E
Pseudomonas trivialis LMG 21464	fluorescens	fluorescens	trivialis	LMG 21464	fluorescens	fluorescens	Pseudomonas_E
Pseudomonas marginalis ATCC 10844	fluorescens	fluorescens	marginalis	NCPPB 667	fluorescens	fluorescens	Pseudomonas_E
Pseudomonas panacis CIP108524	fluorescens	fluorescens
Pseudomonas grimontii ATCC BAA-140	fluorescens	fluorescens	grimontii	DSM 17515	fluorescens	fluorescens	Pseudomonas_E
Pseudomonas extremaustralis DSM 17835	fluorescens	fluorescens	extremaustralis	DSM 17835	fluorescens	fluorescens	Pseudomonas_E
Pseudomonas veronii LMG 17761	fluorescens	fluorescens	veronii	LMG 17761	fluorescens	fluorescens	Pseudomonas_E
Pseudomonas rhodesiae LMG 17764	fluorescens	fluorescens	rhodesiae	LMG 17764	fluorescens	fluorescens	Pseudomonas_E
Pseudomonas kairouanesis KC12	fluorescens	fluorescens
Pseudomonas nabeulensis E10B	fluorescens	fluorescens
Pseudomonas palleroniana LMG 23076	fluorescens	fluorescens	palleroniana	LMG 23076	fluorescens	fluorescens	Pseudomonas_E
Pseudomonas tolaasii ATCC 33618	fluorescens	fluorescens	tolaasii	NCPPB 2192	fluorescens	fluorescens	Pseudomonas_E
Pseudomonas orientalis DSM 17489	fluorescens	fluorescens	orientalis	LMG 23660	fluorescens	fluorescens	Pseudomonas_E
Pseudomonas cedrina subsp. cedrina CFML 96-198;DSM 17516	fluorescens	fluorescens	cedrina	LMG 23661	fluorescens	fluorescens	Pseudomonas_E
Pseudomonas cedrina subsp. fulgida DSM 14938;LMG21467	fluorescens	fluorescens
Pseudomonas lactis DSM29167	fluorescens	fluorescens					Pseudomonas_E
Pseudomonas paralactis DSM 29164	fluorescens	fluorescens
Pseudomonas libanensis CIP 105460	fluorescens	fluorescens	libanensis	DSM 17149	fluorescens	fluorescens	Pseudomonas_E
Pseudomonas synxantha ATCC 9890	fluorescens	fluorescens	synxantha	LMG 2190	fluorescens	fluorescens	Pseudomonas_E
Pseudomonas mucidolens LMG 2223	fluorescens	gessardii	mucidolens	LMG 2223	fluorescens	gessardii	Pseudomonas_E
Pseudomonas yamanorum LMG 27247	fluorescens	gessardii	yamanorum	LMG 27247	fluorescens	fluorescens	Pseudomonas_E
Pseudomonas brenneri DSM 15294	fluorescens	gessardii	brenneri	DSM 15294	fluorescens	gessardii	Pseudomonas_E
Pseudomonas proteolytica CIP 108464	fluorescens	gessardii	proteolytica	LMG 22710	fluorescens	gessardii
Pseudomonas gessardii LMG 21604	fluorescens	gessardii	gessardii	LMG 21604	fluorescens	gessardii	Pseudomonas_E
Pseudomonas meridiana CIP 108465	fluorescens	gessardii
Pseudomonas endophytica BSTT44;CECT 8691T	fluorescens	fragi	endophytica	BSTT44	fluorescens	fragi	Pseudomonas_E
Pseudomonas helleri DSM 29165	fluorescens	fragi	helleri	DSM 29165	fluorescens	fragi	Pseudomonas_E
Pseudomonas lundensis ATCC 49968	fluorescens	fragi	lundensis	LMG 13517	fluorescens	fragi	Pseudomonas_E
Pseudomonas taetrolens LMG 2336	fluorescens	fragi	taetrolens	LMG 2336	fluorescens	fragi	Pseudomonas_E
Pseudomonas versuta L10.10	fluorescens	fragi					Pseudomonas_E
Pseudomonas weihenstephanensis DSM29166	fluorescens	fragi	weihenstephanensis	DSM 29166	fluorescens	fragi	Pseudomonas_E
Pseudomonas fragi CECT 446	fluorescens	fragi	fragi	NRRL B-727	fluorescens	fragi	Pseudomonas_E
Pseudomonas deceptionensis CECT 7677	fluorescens	fragi	deceptionensis	LMG 25555	fluorescens	fragi	Pseudomonas_E
Pseudomonas psychrophila DSM17535	fluorescens	fragi	psychrophila	LMG 24276	fluorescens	fragi	Pseudomonas_E
Pseudomonas arsenicoxydans CECT 7543	fluorescens	mandelii	arsenicoxydans	CECT 7543	fluorescens	mandelii	Pseudomonas_E
Pseudomonas mandelii LMG 21607	fluorescens	mandelii	mandelii	LMG 21607	fluorescens	mandelii	Pseudomonas_E
Pseudomonas frederiksbergensis LMG 19851	fluorescens	mandelii	frederiksbergensis	LMG 19851	fluorescens	mandelii	Pseudomonas_E
Pseudomonas prosekii LMG 26867	fluorescens	mandelii	prosekii	LMG 26867	fluorescens	mandelii	Pseudomonas_E
Pseudomonas silesiensis A3	fluorescens	mandelii
Pseudomonas lini CFBP 5737	fluorescens	mandelii	lini	DSM 16768	fluorescens	mandelii	Pseudomonas_E
Pseudomonas migulae CCUG 43165	fluorescens	mandelii	migulae	LMG 21608	fluorescens	mandelii	Pseudomonas_E
Pseudomonas granadensis DSM 28040	fluorescens	koreensis	granadensis	LMG 27940	fluorescens	koreensis	Pseudomonas_E
Pseudomonas moraviensis DSM 16007	fluorescens	koreensis	moraviensis	LMG 24280	fluorescens	koreensis	Pseudomonas_E
Pseudomonas koreensis LMG21318	fluorescens	koreensis	koreensis	LMG 21318	fluorescens	koreensis	Pseudomonas_E
Pseudomonas kribbensis DSM 100278	fluorescens	koreensis
Pseudomonas baetica CECT 7720	fluorescens	koreensis	baetica	LMG 25716	fluorescens	koreensis	Pseudomonas_E
Pseudomonas helmanticensis CECT 8548	fluorescens	koreensis	helmanticensis	LMG 28168	fluorescens	koreensis
Pseudomonas mohnii CCUG 53115	fluorescens	jessenii	mohnii	DSM 18327	fluorescens	jessenii	Pseudomonas_E
Pseudomonas moorei CCUG 53114	fluorescens	jessenii	moorei	DSM 12647	fluorescens	jessenii	Pseudomonas_E
Pseudomonas reinekei CCUG 53116	fluorescens	jessenii	reinekei	DSM 18361	fluorescens	jessenii	Pseudomonas_E
Pseudomonas umsongensis LMG 21317	fluorescens	jessenii	umsongensis	LMG 21317	fluorescens	jessenii	Pseudomonas_E
Pseudomonas vancouverensis ATCC 700688	fluorescens	jessenii	vancouverensis	LMG 20222	fluorescens	jessenii	Pseudomonas_E
Pseudomonas laurylsulfatovorans AP3_22	fluorescens	jessenii
Pseudomonas jessenii ATCC 700870	fluorescens	jessenii	jessenii	LMG 21605	fluorescens	jessenii	Pseudomonas_E
Pseudomonas laurylsulfatiphila AP3_16	fluorescens	jessenii
Pseudomonas brassicacearum subsp. brassicacearum DSM 13227	fluorescens	corrugata	brassicacearum	LMG 21623	fluorescens	corrugata	Pseudomonas_E
Pseudomonas kilonensis DSM 13647	fluorescens	corrugata	kilonensis	DSM 13647	fluorescens	corrugata	Pseudomonas_E
Pseudomonas thivervalensis DSM 13194	fluorescens	corrugata	thivervalensis	DSM 13194	fluorescens	corrugata	Pseudomonas_E
Pseudomonas corrugata ATCC 29736	fluorescens	corrugata	corrugata	LMG 2172	fluorescens	corrugata	Pseudomonas_E
Pseudomonas mediterranea CFBP 5447	fluorescens	corrugata	mediterranea	DSM 16733	fluorescens	corrugata	Pseudomonas_E
Pseudomonas protegens DSM 19095	fluorescens	chlororaphis	protegens	CHA0	fluorescens	protegens	Pseudomonas_E
Pseudomonas saponiphila DSM 9751	fluorescens	chlororaphis	saponiphila	DSM 9751	fluorescens	protegens	Pseudomonas_E
Pseudomonas chlororaphis subsp. chlororaphis DSM 50083	fluorescens	chlororaphis	chlororaphis subsp. chlororaphis	ATCC 9446	fluorescens	chlororaphis	Pseudomonas_E
Pseudomonas chlororaphis subsp. piscium DSM 21509	fluorescens	chlororaphis	chlororaphis subsp. piscium	DSM 21509	fluorescens	chlororaphis	Pseudomonas_E
Pseudomonas chlororaphis subsp. aurantiaca NCIB 10068	fluorescens	chlororaphis	chlororaphis subsp. aurantiaca	LMG 21630	fluorescens	chlororaphis	Pseudomonas_E
Pseudomonas chlororaphis subsp. aureofaciens DSM 6698	fluorescens	chlororaphis	chlororaphis subsp. aureofaciens	ATCC 13985	fluorescens	chlororaphis	Pseudomonas_E
Pseudomonas batumici UCM_B-321	asplenii	-	batumici	UCM B-321	fluorescens	asplenii	Pseudomonas_E
Pseudomonas agarici ATCC 25941	asplenii	-	agarici	LMG 2112	fluorescens	asplenii	Pseudomonas_E
Pseudomonas asplenii LMG 2137	asplenii	-	asplenii	ATCC 23835	fluorescens	asplenii	Pseudomonas_E
Pseudomonas fuscovaginae LMG 2158	asplenii	-	fuscovaginae	LMG 2158	fluorescens	asplenii	Pseudomonas_E
Pseudomonas abietaniphila ATCC 700689	lutea	-	abietaniphila	ATCC 700689	lutea		Pseudomonas_E
Pseudomonas bohemica IA19	lutea	-
Pseudomonas graminis LMG 21661	lutea	-	graminis	DSM 11363	lutea		Pseudomonas_E
Pseudomonas lutea LMG 21974	lutea	-	lutea	DSM 17257	lutea		Pseudomonas_E
Pseudomonas caspiana FBF102	syringae	-					Pseudomonas_E
Pseudomonas cichorii ATCC 10857	syringae	-	cichorii	ATCC 10857	syringae		Pseudomonas_E
Pseudomonas asturiensis LMG 26898	syringae	-	asturiensis	LMG 26898	syringae		Pseudomonas_E
Pseudomonas viridiflava ATCC 13223	syringae	-	viridiflava	ICMP 2848	syringae		Pseudomonas_E
Pseudomonas floridensis GEV388	syringae	-					Pseudomonas_E
Pseudomonas cannabina LMG 5096	syringae	-	cannabina	ICMP 2823	syringae		Pseudomonas_E
Pseudomonas avellanae CIP 105176	syringae	-	avellanae	BPIC 631	syringae
Pseudomonas coronafaciens LMG 5060	syringae	-					Pseudomonas_E
Pseudomonas congelans LMG 21466	syringae	-	congelans	DSM 14939	syringae		Pseudomonas_E
Pseudomonas syringae NCPPB 281	syringae	-	syringae	ICMP 3023	syringae		Pseudomonas_E
Pseudomonas cerasi LMG 28609	syringae	-
Pseudomonas caricapapayae LMG 2152	syringae	-	caricapapayae	ICMP 2855	syringae		Pseudomonas_E
Pseudomonas amygdali LMG 13184	syringae	-	amygdali	CFBP 3205	syringae		Pseudomonas_E
Pseudomonas tremae LMG 22121	syringae	-	tremae	ICMP 9151	syringae
Pseudomonas ficuserectae CCUG 32779	syringae	-	ficuserectae	ICMP 7848	syringae		Pseudomonas_E
Pseudomonas meliae CCUG 51503	syringae	-	meliae	ICMP 6289	syringae		Pseudomonas_E
Pseudomonas savastanoi LMG 2209	syringae	-	savastanoi	4352	syringae		Pseudomonas_E
Pseudomonas turukhanskensis IB-1.1	-	-
Pseudomonas coleopterorum CECT 8695	-	-	coleopterorum	LMG 28558	putida
Pseudomonas rhizosphaerae LMG 21640	-	-	rhizosphaerae	DSM 17497	putida		Pseudomonas_E
Pseudomonas japonica JCM 21532	putida	-	japonica	NBRC 103040	putida		Pseudomonas_E
Pseudomonas qingdaonensis JJ3	putida	-
Pseudomonas donghuensis HYS	putida	-	donghuensis	HYS	putida		Pseudomonas_E
Pseudomonas wadenswillerensis CCOS 864	putida	-
Pseudomonas vranovensis DSM 16006	putida	-	vranovensis	DSM 16006	putida		Pseudomonas_E
Pseudomonas alkylphenolica JCM 16553	putida	-					Pseudomonas_E
Pseudomonas reidholzensis CCOS 865	putida	-
Pseudomonas cremoricolorata DSM 17059	putida	-	cremoricolorata	DSM 17059	putida		Pseudomonas_E
Pseudomonas fulva ATCC 31418	putida	-	fulva	DSM 17717	putida		Pseudomonas_E
Pseudomonas parafulva DSM 17004	putida	-	parafulva	DSM 17004	putida		Pseudomonas_E
Pseudomonas guariconensis LMG 27394	putida	-	guariconensis	LMG 27394	putida		Pseudomonas_E
Pseudomonas mosselii ATCC BAA-99	putida	-	mosselii	DSM 17497	putida		Pseudomonas_E
Pseudomonas soli LMG 27941	putida	-	soli	LMG 27941	putida		Pseudomonas_E
Pseudomonas entomophila L48T	putida	-	entomophila	L48	putida		Pseudomonas_E
Pseudomonas taiwanensis DSM 21245	putida	-	taiwanensis	DSM 21245	putida		Pseudomonas_E
Pseudomonas hunanensis NCCB 100446	putida	-
Pseudomonas plecoglossicida ATCC 700383	putida	-	plecoglossicida	DSM 15088	putida		Pseudomonas_E
Pseudomonas putida ATCC 12633	putida	-	putida	NBRC 14164	putida		Pseudomonas_E
Pseudomonas monteilii ATCC 700476	putida	-	monteilii	DSM 14164	putida		Pseudomonas_E
Pseudomonas asiatica RYU5	putida	-
Pseudomonas pyomelaminifaciens MR 02	putida	-
"Pseudomonas massiliensis" CB1	none	-					Pseudomonas_E
Pseudomonas mangrovi TC-11	none	-
"Pseudomonas sichuanensis" WCHPs060039;TC-11	none	-
Pseudomonas argentinensis LMG 22563	straminea	-	argentinensis	LMG 22563	straminea		Pseudomonas_E
Pseudomonas straminea LMG21615	straminea	-	straminea	JCM 2783	straminea		Pseudomonas_E
Pseudomonas punonensis CECT 8089	straminea	-	punonensis	CECT 8089	straminea
Pseudomonas flavescens LMG 18387	straminea	-	flavescens	LMG 18387	straminea		Pseudomonas_E
Pseudomonas seleniipraecipitans LMG 25475	straminea	-	seleniipraecipitans	LMG 25475	straminea		Pseudomonas_E
Pseudomonas anguilliseptica LMG 21629	anguilliseptica	-	anguilliseptica	DSM 12111	anguilliseptica		Pseudomonas_E
Pseudomonas peli LMG 23201	anguilliseptica	-	peli	DSM 17833	anguilliseptica		Pseudomonas_E
Pseudomonas guineae M8	anguilliseptica	-	guineae	LMG 24016	anguilliseptica		Pseudomonas_E
Pseudomonas cuatrocienegasensis CIP 109853	anguilliseptica	-	cuatrocienegasensis	CIP 109853	none		Pseudomonas_E
Pseudomonas marincola JCM 14761	anguilliseptica	-	marincola	JCM 14761	anguilliseptica		Pseudomonas_E
Pseudomonas segetis IMSNU 14101	anguilliseptica	-	segetis	CIP 108523	anguilliseptica		Pseudomonas_E
Pseudomonas taeanensis KCTC 22612	anguilliseptica	-	taeanensis	MS3	anguilliseptica		Pseudomonas_E
Pseudomonas benzenivorans DSM 8628	anguilliseptica	-	benzenivorans	DSM 8628	anguilliseptica		Pseudomonas_E
Pseudomonas borbori LMG 23199	anguilliseptica	-	borbori	DSM 17834	anguilliseptica		Pseudomonas_E
Pseudomonas pohangensis DSM 17875	none	-	pohangensis	DSM 17875	none
Pseudomonas chloritidismutans AW-1	stutzeri	-	chloritidismutans	AW-1	stutzeri
Pseudomonas kunmingensis DSM 25974	stutzeri	-	kunmingensis	DSM 25974	stutzeri		Pseudomonas_A
Pseudomonas songnenensis NEAU-ST5-5	stutzeri	-
Pseudomonas perfectomarina ATCC 14405 = CCUG 16156	stutzeri	-
Pseudomonas stutzeri ATCC 17588	stutzeri	-	stutzeri	CGMCC 1.1803	stutzeri		Pseudomonas_A
Pseudomonas balearica DSM 6083	stutzeri	-	balearica	DSM 6083	stutzeri		Pseudomonas_A
Pseudomonas saudiphocaensis 20 BN	stutzeri	-					Pseudomonas_A
Pseudomonas xanthomarina CCUG 46543	stutzeri	-	xanthomarina	LMG 23572	stutzeri		Pseudomonas_A
Pseudomonas zhaodongensis DSM 27559	stutzeri	-
Pseudomonas azotifigens DSM 17556	stutzeri	-	azotifigens	6H33b	stutzeri		Pseudomonas_N
Pseudomonas urumqiensis T3	stutzeri	-
Pseudomonas matsuisoli CCMHH0089	stutzeri	-
Pseudomonas kuykendallii NRRL B-59562	stutzeri	-	kuykendallii	NRRL B-59562	none		Pseudomonas_O
Pseudomonas indica LMG 23066	none	-	indica	JCM 21544	none		Pseudomonas_M
Pseudomonas chengduensis DSM 26382	oleovorans	-	chengduensis	DSM 26382	oleovorans		Pseudomonas_E
"Pseudomonas sihuiensis" KCTC 32246	oleovorans	-	sihuiensis	KCTC 32246	oleovorans		Pseudomonas_E
Pseudomonas toyotomiensis NCIMB 14511	oleovorans	-	toyotomiensis	JCM 15604	oleovorans		Pseudomonas_E
Pseudomonas alcaliphila LMG 23134	oleovorans	-	alcaliphila	JCM 10630	oleovorans		Pseudomonas_E
Pseudomonas sediminis PI11	oleovorans	-					Pseudomonas_E
"Pseudomonas indoloxydans" JCM 14246	oleovorans	-					Pseudomonas_E
Pseudomonas oleovorans subsp. oleovorans ATCC 8062	oleovorans	-	oleovorans	RS1	oleovorans		Pseudomonas_E
Pseudomonas pseudoalcaligenes subsp. pseudoalcaligenes LMG 1225	oleovorans	-	pseudoalcaligenes	NBRC14167	oleovorans		Pseudomonas_E
Pseudomonas guguanensis JCM18416	oleovorans	-	guguanensis	JCM 18416	oleovorans		Pseudomonas_E
Pseudomonas mendocina ATCC 25411	oleovorans	-	mendocina	NBRC 14162	oleovorans		Pseudomonas_E
Pseudomonas fluvialis ASS-1	none	-
Pseudomonas pharmacofabricae ZYSR67-Z	none	-
Pseudomonas alcaligenes ATCC 14909	none	-	alcaligenes	NBRC 14159	none		Pseudomonas_E
Pseudomonas linyingensis LMG 25967	linyingensis	-	linyingensis	LMG 25967	linyingensis		Pseudomonas_K
Pseudomonas sagittaria JCM 18195	linyingensis	-	sagittaria	JCM 18195	linyingensis		Pseudomonas_K
Pseudomonas guangdongensis CCTCC 2012022	linyingensis	-	guangdongensis	CCTCC AB 2012022	linyingensis		Pseudomonas_K
Pseudomonas oryzae KCTC 32247	linyingensis	-	oryzae	KCTC 32247	linyingensis		Pseudomonas_K
Azotobacter chroococcum ATCC 9043	-	-					Azotobacter
Azotobacter beijerinckii ICMP 8673	-	-					Azotobacter
Pseudomonas flexibilis ATCC 29606	none	-	flexibilis	JCM 14085	none		Pseudomonas_H
Pseudomonas tuomuerensis CECT 7766	none	-
Pseudomonas thermotolerans CIP 107795	none	-	thermotolerans	DSM 14292	none		Pseudomonas_G
Pseudomonas furukawaii KF707	resinovorans	-
Pseudomonas resinovorans LMG 2274	resinovorans	-	resinovorans	DSM 21078	resinovorans		Pseudomonas_F
Pseudomonas otitidis DSM 17224	resinovorans	-	otitidis	DSM 17224	resinovorans		Pseudomonas_F
Pseudomonas aeruginosa ATCC 10145	aeruginosa	-	aeruginosa	DSM 50071	aeruginosa		Pseudomonas
Pseudomonas composti C2	aeruginosa	-	composti	CCUG 59231	oleovorans		Pseudomonas_E
Pseudomonas nitritireducens LMG 25966	aeruginosa	-
Pseudomonas nitroreducens ATCC 33634	aeruginosa	-	nitroreducens	LMG 21614	aeruginosa		Pseudomonas
Pseudomonas jinjuensis LMG 21316	aeruginosa	-	jinjuensis	JCM 21621	aeruginosa		Pseudomonas
Pseudomonas panipatensis CCM 7469T	aeruginosa	-	panipatensis	LMG 24738	aeruginosa		Pseudomonas
Pseudomonas knackmussii LMG 23759	aeruginosa	-	knackmussii	B13	aeruginosa		Pseudomonas
Pseudomonas citronellolis LMG 18378	aeruginosa	-	citronellolis	LMG 18378	aeruginosa		Pseudomonas
Pseudomonas delhiensis RLD-1	aeruginosa	-	delhiensis	CCM 7361	aeruginosa
Pseudomonas humi CCA1	aeruginosa	-					Pseudomonas
Pseudomonas oryzihabitans ATCC 43272	oryzihabitans	-	oryzihabitans	NBRC 102199	oryzihabitans		Pseudomonas_B
Pseudomonas psychrotolerans LMG 21977	oryzihabitans	-	psychrotolerans	DSM 15758	oryzihabitans		Pseudomonas_B
Pseudomonas duriflava KCTC 22129	oryzihabitans	-	duriflava	CGMCC 1.6858	oryzihabitans
Pseudomonas luteola LMG 7041	oryzihabitans	-	luteola	JCM 3352	oryzihabitans		Pseudomonas_B
Pseudomonas zeshuii KACC 15471	oryzihabitans	-	zeshuii	KACC 15471	oryzihabitans
Pseudomonas hussainii JCM 19513	pertucinogena	-	hussainii	JCM 19513	none		Pseudomonas_L
Pseudomonas yangmingensis DSM 24213	pertucinogena	-	yangmingensis	DSM 24213	pertucinogena		Pseudomonas_D
Pseudomonas salegens CECT 8338	pertucinogena	-	salegens	CECT 8338	pertucinogena		Pseudomonas_D
Pseudomonas pelagia JCM 15562	pertucinogena	-	pelagia	CL-AP6	pertucinogena		Pseudomonas_D
Pseudomonas salina XCD-X85	pertucinogena	-
Pseudomonas profundi M5	pertucinogena	-
Pseudomonas xinjiangensis NRRLB-51270	pertucinogena	-	xinjiangensis	NRRL B-51270	pertucinogena		Pseudomonas_D
Pseudomonas abyssi MT5	pertucinogena	-
Pseudomonas gallaeciencis V113	pertucinogena	-
Pseudomonas pachastrellae CCUG 46540	pertucinogena	-	pachastrellae	JCM 12285	pertucinogena		Pseudomonas_D
Pseudomonas aestusnigri GXO14	pertucinogena	-	aestusnigri	CECT 8317	pertucinogena		Pseudomonas_D
Pseudomonas oceani DSM 100277	pertucinogena	-
Pseudomonas sabulinigri KCTC 22137	pertucinogena	-	sabulinigri	JCM 14963	pertucinogena		Pseudomonas_D
Pseudomonas formosensis JCM 18415	pertucinogena	-	formosensis	JCM 18415	pertucinogena		Pseudomonas_D
Pseudomonas pertucinogena LMG 1874	pertucinogena	-	pertucinogena	DSM 18268	pertucinogena
Pseudomonas litoralis 2SM5	pertucinogena	-	litoralis	2SM5	pertucinogena		Pseudomonas_D
Pseudomonas xiamenensis JCM 13530	pertucinogena	-	xiamenensis	DSM 22326	pertucinogena
Pseudomonas bauzanensis DSM 22558	pertucinogena	-	bauzanensis	DSM 22558	pertucinogena		Pseudomonas_D
Pseudomonas saudimassiliensis 12M76	pertucinogena	-					Pseudomonas_D
Pseudomonas caeni CECT 7778	none	-	caeni	DSM 24390	none		Pseudomonas_C
Thiopseudomonas denitrificans DSM 28679	-	-					Thiopseudomonas
Thiopseudomonas denitrificans X2	-	-					Thiopseudomonas
Ventosimonas gracilis CV58	-	-					Ventosimonas
Oblitimonas alkaliphila B4199	-	-					Oblitimonas
Azomonas agilis DSM 375	-	-
Entomomonas moraniae QZS01	-	-
Cellvibrio japonicus Ueda107	-	-					Cellvibrio
Escherichia coli ATCC 11775= DSM 30083	-	-					Escherichia
P. aestus, P. asuensis, P. glareae, P. gregormendelii, P. laurentiana, P. multiresinivorans, P. oleovorans subsp. lubricantis, P. populi, P. sesami, P. tianjinensis and P. uticensis are not included in the concatenated analysis because some of the 4-genes are missing. P. tarimensis has not been sequenced yet.
